# Supplementary material for: Cytoplasmic protein misfolding titrates Hsp70 to activate nuclear Hsf1
Source: eLife. 2019 Sep 25;8:e47791. doi: 10.7554/eLife.47791 (PMC6779467; doi:10.7554/eLife.47791)
Supplement: Figure 5—source data 1. — Data from three independent cultures of each strain (I, II, III) are provided. [file elife-47791-fig5-data1.xlsx]

## Sheet: Sheet1
ENSEMBL_ID	Gene_ID	WT_I	WT_II	WT_III	WT_HS_I	WT_HS_II	WT_HS_III	fes1D_I	fes1D_II	fes1D_III	fes1D_HS_I	fes1D_HS_II	fes1D_HS_III
15S_rRNA	15S_RRNA	0	0	0	0	0	0	0	0	0	0	0	0
21S_rRNA	21S_RRNA	0	0	0	0	0	0	0	0	0	0	0	0
HRA1	HRA1	0	0	0	0	0	0	0	0	0	0.440783	0.433058	0
ICR1	ICR1	4.84324	4.84291	3.91121	7.80447	7.46075	7.58577	5.02894	5.01704	4.38842	7.12203	5.86388	8.46208
LSR1	LSR1	6.30377	8.88756	5.00181	9.9038	5.29978	6.23474	6.85631	7.57078	5.60164	5.65693	4.98582	5.44745
NME1	NME1	21.7014	9.09765	9.66733	35.1834	42.3772	43.7925	14.6986	16.0816	6.41444	116.536	83.2613	104.946
PWR1	PWR1	0	0	0	0	0	0	0	0	0	0	0	0
Q0010	Q0010	0	0	0	0	0	0	0	0	0	0	0	0
Q0017	Q0017	0	0	0	0	0	0	0	0	0	0	0	0
Q0032	Q0032	0	0	0	0	0	0	0	0	0	0	0	0
Q0045	COX1	0	0	0	0	0	0	0	0	0	0	0	0
Q0050	AI1	0	0	0	0	0	0	0	0	0	0	0	0
Q0055	AI2	0	0	0	0	0	0	0	0	0	0	0	0
Q0060	AI3	0	0	0	0	0	0	0	0	0	0	0	0
Q0065	AI4	0	0	0	0	0	0	0	0	0	0	0	0
Q0070	AI5_ALPHA	0	0	0	0	0	0	0	0	0	0	0	0
Q0075	AI5_BETA	0	0	0	0	0	0	0	0	0	0	0	0
Q0080	ATP8	0	0	0	0	0	0	0	0	0	0	0	0
Q0085	ATP6	0	0	0	0	0	0	0	0	0	0	0	0
Q0092	Q0092	0	0	0	0	0	0	0	0	0	0	0	0
Q0105	COB	0	0	0	0	0	0	0	0	0	0	0	0
Q0110	BI2	0	0	0	0	0	0	0	0	0	0	0	0
Q0115	BI3	0	0	0	0	0	0	0	0	0	0	0	0
Q0120	BI4	0	0	0	0	0	0	0	0	0	0	0	0
Q0130	OLI1	0	0	0	0	0	0	0	0	0	0	0	0
Q0140	VAR1	0	0	0	0	0	0	0	0	0	0	0	0
Q0142	Q0142	0	0	0	0	0	0	0	0	0	0	0	0
Q0143	Q0143	0	0	0	0	0	0	0	0	0	0	0	0
Q0144	Q0144	0	0	0	0	0	0	0	0	0	0	0	0
Q0160	SCEI	0	0	0	0	0	0	0	0	0	0	0	0
Q0182	Q0182	0	0	0	0	0	0	0	0	0	0	0	0
Q0250	COX2	0	0	0	0	0	0	0	0	0	0	0	0
Q0255	Q0255	0	0	0	0	0	0	0	0	0	0	0	0
Q0275	COX3	0	0	0	0	0	0	0	0	0	0	0	0
Q0297	Q0297	0	0	0	0	0	0	0	0	0	0	0	0
R0010W	FLP1	46.4947	44.1221	45.2201	22.3751	29.7622	25.2843	27.5034	27.5134	64.8566	68.7717	64.4993	76.1212
R0020C	REP1	502.205	479.761	520.11	450.341	441.822	474.699	413.089	406.405	786.398	844.712	785.699	1384.13
R0030W	RAF1	290.836	223.602	295.519	384.671	384.264	398.162	240.488	229.561	578.835	551.401	554.485	1016.78
R0040C	REP2	533.143	473.66	530.865	606.561	559.626	592.419	356.326	382.001	842.135	722.434	668.803	1534.83
RDN18-1	RDN18-1	907.171	663.335	677.775	811.014	686.898	664.473	641.743	478.027	440.847	671.08	626.927	781.499
RDN18-2	RDN18-2	907.201	663.337	677.813	809.863	686.946	664.452	641.739	478.098	440.847	671.003	626.779	781.486
RDN25-1	RDN25-1	517.494	552.449	504.574	580.227	415.357	423.732	411.274	340.884	363.969	382.987	387.256	519.146
RDN25-2	RDN25-2	518.129	552.474	504.593	580.465	415.362	423.771	411.4	340.849	364.014	383.046	387.257	519.117
RDN37-1	RDN37-1	1.89991	2.29823	2.77747	2.05808	0.978792	3.56943	1.59036	2.2175	2.61607	2.19672	2.12527	5.00994
RDN37-2	RDN37-2	1.89975	2.29568	2.77744	2.05825	0.97878	3.56937	1.5903	2.2175	2.61607	2.1967	2.12525	5.00995
RDN5-1	RDN5-1	212.002	51.4327	119.624	0	0	316.418	0	188.966	271.602	179.864	175.866	0
RDN5-2	RDN5-2	102.181	61.968	252.048	0	0	0	0	0	0	216.498	0	0
RDN5-3	RDN5-3	102.181	61.968	252.048	0	0	0	0	0	0	216.498	0	0
RDN5-4	RDN5-4	102.181	61.968	252.048	0	0	0	0	0	0	216.498	0	0
RDN5-5	RDN5-5	102.181	61.968	252.048	0	0	0	0	0	0	216.498	0	0
RDN5-6	RDN5-6	212.002	51.4327	119.624	0	0	316.418	0	188.966	271.602	179.864	175.866	0
RDN58-1	RDN58-1	786.99	530.214	347.018	1325.76	448.261	555.58	503.099	405.243	257.391	709.849	237.878	453.204
RDN58-2	RDN58-2	786.992	509.9	347.018	1325.76	448.261	555.581	503.1	405.243	257.391	709.849	237.879	453.204
RNA170	RNA170	0	0	0	0	0	0	29.4059	0	0	0	0	0
RPM1	RPM1	0	0	0	0	0	0	0	0	0	0	0	0
RPR1	RPR1	1.95265	1.14489	4.86895	16.6542	12.0158	12.9797	0	2.41096	3.66671	2.88918	17.5456	11.8736
RUF20	RUF20	10.4719	7.97388	15.6369	8.76189	5.8817	4.09231	10.9261	7.62791	12.3044	6.4353	5.60363	5.75256
RUF21	RUF21	0.226976	0	0	0.296277	0	0	0	0	0	0	0	0
RUF22	RUF22	0.409535	0	0	0	0	0	0	0	0	0	0	0
RUF23	RUF23	0	4.66565	5.1091	5.9389	0	4.80088	0	0	0	5.97906	6.19188	0
RUF5-1	RUF5-1	3.83186	5.34735	3.48976	19.1202	17.5626	21.7336	6.72404	8.1001	13.8843	15.6727	16.9662	19.9407
RUF5-2	RUF5-2	3.83186	5.34735	3.48976	19.1202	17.5626	21.7336	6.72404	8.1001	13.8843	15.6727	16.9662	19.9407
SCR1	SCR1	17.9071	17.8755	16.8088	65.4645	92.7485	63.4879	14.2594	11.1429	9.36482	71.3563	85.0568	119.373
snR10	SNR10	61.7578	54.0554	71.4656	69.1954	45.1621	38.9114	43.1523	42.5756	39.532	6.89548	28.5437	15.839
snR11	SNR11	42.9824	21.8973	62.1836	16.6825	8.00382	13.5226	47.802	24.3672	45.7169	0	17.4703	12.6913
snR128	SNR128	0	0	239.978	0	0	211.509	208.607	756.725	0	0	236.525	0
snR13	SNR13	0	0	0	0	0	0	0	0	0	0	0	0
snR14	SNR14	0	0	0	52.0624	0	0	0	0	0	0	0	0
snR161	SNR161	0	0	0	0	0	0	0	0	0	0	0	0
snR17a	SNR17A	6.85599	14.7042	13.8942	23.9965	24.2704	16.8537	6.34008	10.4214	8.62091	18.8902	21.4669	19.7093
snR17b	SNR17B	33.2544	18.1686	28.095	20.2228	11.5477	13.6307	25.6413	33.3747	19.168	4.24541	6.51501	8.86462
snR18	SNR18	45979.4	0	21309.8	0	44253.9	0	18633.9	0	19505.2	43161.7	0	0
snR189	SNR189	0	16.6315	0	0	16.8042	17.0683	0	0	0	0	0	0
snR19	SNR19	13.4124	10.8516	13.2919	14.2259	10.7571	13.7412	13.7438	10.8668	10.7784	15.6291	20.0422	26.3012
snR190	SNR190	0	16.2273	0	42.9831	16.369	0	49.5311	0	0	0	20.3101	49.0015
snR191	SNR191	22.6009	30.9728	26.0639	25.9679	40.2143	17.7265	44.0954	26.4694	35.9224	13.3265	18.3983	14.7302
snR24	SNR24	0	0	0	0	0	0	0	0	0	0	0	0
snR3	SNR3	0	0	0	0	14.7712	30.2565	0	17.3431	0	0	0	0
snR30	SNR30	18.6882	12.1999	13.8554	18.7735	19.0087	17.4665	13.0624	12.2979	10.9889	10.6308	13.0268	11.7112
snR31	SNR31	125.498	92.4093	51.6414	79.8694	80.8693	94.9327	38.7453	61.75	88.7336	58.216	60.0517	34.3376
snR32	SNR32	55.6983	0	0	0	17.2549	34.9944	17.354	20.1609	35.9539	20.8654	0	25.7563
snR33	SNR33	142.54	193.773	244.711	309.151	375.666	357.93	197.397	184.042	347.614	141.683	120.219	175.849
snR34	SNR34	39.1739	36.0349	0	0	11.8649	0	12.1805	42.0827	12.6316	14.8857	30.5341	36.1147
snR35	SNR35	19.1628	0	13.3272	46.3096	23.1808	48.2631	29.7852	41.1393	12.3568	0	29.9092	17.6605
snR36	SNR36	0	0	0	52.9304	0	0	0	23.6391	0	0	0	0
snR37	SNR37	15.3094	10.8943	10.5424	16.7518	9.55034	12.2388	11.018	12.4773	17.0073	9.8977	2.49303	2.53383
snR38	SNR38	0	0	0	0	0	0	0	0	0	0	0	0
snR39	SNR39	0	0	0	0	0	0	0	0	0	0	0	0
snR39B	SNR39B	0	0	0	0	0	0	0	0	0	0	0	0
snR4	SNR4	205.085	268.968	164.426	190.412	364.134	386.433	109.549	191.138	151.303	43.8149	0	27.1022
snR40	SNR40	0	0	0	0	0	0	0	0	0	0	0	0
snR41	SNR41	0	0	0	0	0	0	0	0	0	0	0	0
snR42	SNR42	4.58855	9.49096	12.9652	6.60273	11.8414	6.9913	3.93955	7.16722	1.43902	5.18309	7.03081	10.7147
snR43	SNR43	34.4409	31.6942	23.8826	41.5026	10.3368	32.543	42.7717	12.2743	22.1957	0	13.5177	15.8408
snR44	SNR44	239.53	385.146	171.612	53.0237	128.515	52.0373	153.774	246.86	263.947	25.2827	25.9921	15.183
snR45	SNR45	0	0	30.3935	35.2085	0	0	0	0	83.4839	0	0	0
snR46	SNR46	56.0577	96.2011	62.6151	0	27.4128	0	69.8003	96.7863	72.3416	0	34.6926	0
snR47	SNR47	0	0	0	0	0	0	0	0	0	0	0	0
snR48	SNR48	0	0	0	0	0	0	0	0	0	0	0	0
snR49	SNR49	214.643	294.481	151.488	43.9047	68.7405	167.877	133.486	157.487	207.624	0	0	0
snR5	SNR5	28.7441	35.2574	26.6543	15.4365	46.3617	60.3289	47.6564	13.7131	61.7839	29.1529	14.9546	52.9814
snR50	SNR50	0	0	0	0	0	0	0	0	0	0	0	0
snR51	SNR51	0	0	0	0	0	0	0	0	0	0	0	0
snR52	SNR52	0	0	0	0	0	0	0	0	0	0	0	0
snR53	SNR53	0	0	0	0	0	0	0	0	0	0	0	0
snR54	SNR54	0	0	0	0	0	0	0	0	0	0	0	0
snR55	SNR55	0	0	0	0	0	0	0	0	0	0	0	0
snR56	SNR56	0	0	0	0	0	0	0	0	0	0	0	0
snR57	SNR57	0	0	0	0	0	0	0	0	0	0	0	0
snR58	SNR58	0	0	0	0	0	0	0	0	0	0	0	0
snR59	SNR59	0	0	0	0	0	0	0	0	0	0	0	0
snR6	SNR6	0	0	0	0	0	0	0	0	0	0	0	0
snR60	SNR60	0	0	0	0	0	0	0	0	0	0	0	0
snR61	SNR61	0	0	0	0	0	0	0	0	0	0	0	0
snR62	SNR62	0	0	0	0	0	0	0	0	0	0	0	0
snR63	SNR63	97.5883	82.6534	40.2001	11.6827	12.6316	14.1758	9.12462	61.4709	57.5278	11.7744	6.09706	0
snR64	SNR64	0	0	0	0	0	0	0	0	0	0	0	0
snR65	SNR65	0	0	0	0	0	0	0	0	0	0	0	0
snR66	SNR66	0	0	0	0	0	0	0	0	0	0	0	0
snR67	SNR67	0	0	0	0	0	0	0	0	0	0	0	0
snR68	SNR68	0	0	0	0	120.187	0	0	0	115.792	128.651	0	0
snR69	SNR69	0	0	0	0	0	0	0	0	0	0	0	0
snR7-L	SNR7-L	15.5363	0	10.7406	0	18.4342	0.00022817	0	0	0	24.5424	0.000255798	0.000303016
snR7-S	SNR7-S	0.00547309	0	0	0	22.3421	66.4044	0	0	0	103.239	53.2563	97.9579
snR70	SNR70	166.364	101.421	156.578	136.155	106.708	104.074	68.96	81.4145	214.541	364.907	122.761	307.524
snR71	SNR71	0	0	0	0	0	0	0	0	0	0	0	0
snR72	SNR72	0	0	0	0	0	0	0	0	0	0	0	0
snR73	SNR73	0	0	0	0	0	0	0	0	0	0	0	0
snR74	SNR74	0	0	0	0	0	0	0	0	0	0	0	0
snR75	SNR75	0	0	0	0	0	0	0	0	0	0	0	0
snR76	SNR76	0	0	0	0	0	0	0	0	0	0	0	0
snR77	SNR77	0	0	0	0	0	0	0	0	0	0	0	0
snR78	SNR78	0	0	0	0	0	0	0	0	0	0	0	0
snR79	SNR79	0	0	0	0	0	0	0	0	0	0	0	0
snR8	SNR8	0	0	18.5587	0	16.369	16.6538	16.5104	0	34.2083	19.8922	20.3101	0
snR80	SNR80	22.2213	27.131	0	0	0	55.6788	0	0	0	0	0	41.1115
snR81	SNR81	0	0	0	0	0	0	0	0	0	0	0	0
snR82	SNR82	30.8093	48.8642	44.8846	42.6936	23.7872	7.74193	25.9972	33.1929	27.4612	24.2174	25.0831	37.7645
snR83	SNR83	61.2646	67.1235	52.5651	30.445	23.6259	20.7704	34.9079	36.1143	49.2376	20.2623	17.8923	12.3443
snR84	SNR84	15.0086	16.3867	16.339	13.7823	12.1895	17.9515	13.5229	13.6879	17.6837	3.72544	6.41108	2.86696
snR85	SNR85	22.2213	27.131	0	0	0	0	0	0	0	0	0	0
snR86	SNR86	47.5245	52.4651	50.637	24.3827	34.6308	29.2788	35.1063	39.1956	35.615	41.9107	50.0108	55.7074
snR87	SNR87	0	0	0	0	0	0	0	0	0	0	0	0
snR9	SNR9	28.5606	0	40.0564	115.966	17.7222	71.7656	0	20.6896	18.4367	42.7548	65.4039	105.67
SRG1	SRG1	64.4447	58.7966	69.824	108.181	118.232	119.085	43.11	47.519	55.9395	80.2393	86.6524	85.667
tA(AGC)D	tA(AGC)D	0	0	0	0	0	0	0	0	0	0	0	0
tA(AGC)F	tA(AGC)F	0	0	0	0	0	0	0	0	0	0	0	0
tA(AGC)G	tA(AGC)G	0	0	0	0	0	0	0	0	0	0	0	0
tA(AGC)H	tA(AGC)H	0	0	0	0	0	0	0	0	0	0	0	0
tA(AGC)J	tA(AGC)J	0	0	0	0	0	0	0	0	0	0	0	0
tA(AGC)K1	tA(AGC)K1	0	0	0	0	0	0	0	0	0	0	0	0
tA(AGC)K2	tA(AGC)K2	0	0	0	0	0	0	0	0	0	0	0	0
tA(AGC)L	tA(AGC)L	0	0	0	0	0	0	0	0	0	0	0	0
tA(AGC)M1	tA(AGC)M1	0	0	0	0	0	0	0	0	0	0	0	0
tA(AGC)M2	tA(AGC)M2	0	0	0	0	0	0	0	0	0	0	0	0
tA(AGC)P	tA(AGC)P	0	0	0	0	0	0	0	0	0	0	0	0
tA(UGC)A	tA(UGC)A	0	0	0	0	0	0	0	0	0	0	0	0
tA(UGC)E	tA(UGC)E	0	0	0	0	0	0	0	0	0	0	0	0
tA(UGC)G	tA(UGC)G	0	0	0	0	0	0	0	0	0	0	0	0
tA(UGC)L	tA(UGC)L	0	0	0	0	0	0	0	0	0	0	0	0
tA(UGC)O	tA(UGC)O	0	0	0	0	0	0	0	0	0	0	0	0
tA(UGC)Q	tA(UGC)Q	0	0	0	0	0	0	0	0	0	0	0	0
tC(GCA)B	tC(GCA)B	0	0	0	0	0	0	0	0	0	0	0	0
tC(GCA)G	tC(GCA)G	0	0	0	0	0	0	0	0	0	0	0	0
tC(GCA)P1	tC(GCA)P1	0	0	0	0	0	0	0	0	0	0	0	0
tC(GCA)P2	tC(GCA)P2	0	0	0	0	0	0	0	0	0	0	0	0
tC(GCA)Q	tC(GCA)Q	0	0	0	0	0	0	0	0	0	0	0	0
tD(GUC)B	tD(GUC)B	0	0	0	0	0	0	0	0	0	0	0	0
tD(GUC)D	tD(GUC)D	0	0	0	0	0	0	0	0	0	0	0	0
tD(GUC)G1	tD(GUC)G1	0	0	0	0	0	0	0	0	0	0	0	0
tD(GUC)G2	tD(GUC)G2	0	0	0	0	0	0	0	0	0	0	0	0
tD(GUC)I1	tD(GUC)I1	0	0	0	0	0	0	0	0	0	0	0	0
tD(GUC)I2	tD(GUC)I2	0	0	0	0	0	0	0	0	0	0	0	0
tD(GUC)J1	tD(GUC)J1	0	0	0	0	0	0	0	0	0	0	0	0
tD(GUC)J2	tD(GUC)J2	0	0	0	0	0	0	0	0	0	0	0	0
tD(GUC)J3	tD(GUC)J3	0	0	0	0	0	0	0	0	0	0	0	0
tD(GUC)J4	tD(GUC)J4	0	0	0	0	0	0	0	0	0	0	0	0
tD(GUC)K	tD(GUC)K	0	0	0	0	0	0	0	0	0	0	0	0
tD(GUC)L1	tD(GUC)L1	0	0	0	0	0	0	0	0	0	0	0	0
tD(GUC)L2	tD(GUC)L2	0	0	0	0	0	0	0	0	0	0	0	0
tD(GUC)M	tD(GUC)M	0	0	0	0	0	0	0	0	0	0	0	0
tD(GUC)N	tD(GUC)N	0	0	0	0	0	0	0	0	0	0	0	0
tD(GUC)O	tD(GUC)O	0	0	0	0	0	0	0	0	0	0	0	0
tD(GUC)Q	tD(GUC)Q	0	0	0	0	0	0	0	0	0	0	0	0
tE(CUC)D	tE(CUC)D	0	0	0	0	0	0	0	0	0	0	0	0
tE(CUC)I	tE(CUC)I	0	0	0	0	0	0	0	0	0	0	0	0
tE(UUC)B	tE(UUC)B	0	0	0	0	0	0	0	0	0	0	0	0
tE(UUC)C	tE(UUC)C	0	0	0	0	0	0	0	0	0	0	0	0
tE(UUC)E1	tE(UUC)E1	0	0	0	0	0	0	0	0	0	0	0	0
tE(UUC)E2	tE(UUC)E2	0	0	0	0	0	0	0	0	0	0	0	0
tE(UUC)E3	tE(UUC)E3	0	0	0	0	0	0	0	0	0	0	0	0
tE(UUC)G1	SOE1	0	0	0	0	0	0	0	0	0	0	0	0
tE(UUC)G2	tE(UUC)G2	0	0	0	0	0	0	0	0	0	0	0	0
tE(UUC)G3	tE(UUC)G3	0	0	0	0	0	0	0	0	0	0	0	0
tE(UUC)I	tE(UUC)I	0	0	0	0	0	0	0	0	0	0	0	0
tE(UUC)J	tE(UUC)J	0	0	0	0	0	0	0	0	0	0	0	0
tE(UUC)K	tE(UUC)K	0	0	0	0	0	0	0	0	0	0	0	0
tE(UUC)L	tE(UUC)L	0	0	0	0	0	0	0	0	0	0	0	0
tE(UUC)M	tE(UUC)M	0	0	0	0	0	0	0	0	0	0	0	0
tE(UUC)P	tE(UUC)P	0	0	0	0	0	0	0	0	0	0	0	0
tE(UUC)Q	tE(UUC)Q	0	0	0	0	0	0	0	0	0	0	0	0
tF(GAA)B	tF(GAA)B	0	0	0	0	0	0	0	0	0	0	0	0
tF(GAA)D	tF(GAA)D	0	0	0	0	0	0	0	0	0	0	0	0
tF(GAA)F	tF(GAA)F	0	0	0	0	0	0	0	0	0	0	0	0
tF(GAA)G	tF(GAA)G	0	0	0	0	0	0	0	0	0	0	0	0
tF(GAA)H1	tF(GAA)H1	0	0	0	0	0	0	0	0	0	0	0	0
tF(GAA)H2	tF(GAA)H2	0	0	0	0	0	0	0	0	0	0	0	0
tF(GAA)M	tF(GAA)M	0	0	0	0	0	0	0	0	0	0	0	0
tF(GAA)N	tF(GAA)N	0	0	0	0	0	0	0	0	0	0	0	0
tF(GAA)P1	tF(GAA)P1	0	0	0	0	0	0	0	0	0	0	0	0
tF(GAA)P2	tF(GAA)P2	0	0	0	0	0	0	0	0	0	0	0	0
tF(GAA)Q	tF(GAA)Q	0	0	0	0	0	0	0	0	0	0	0	0
tG(CCC)D	SUF3	0	0	0	0	0	0	0	0	0	0	0	0
tG(CCC)O	SUF5	0	0	0	0	0	0	0	0	0	0	0	0
tG(GCC)B	tG(GCC)B	0	0	0	0	0	0	0	0	0	0	0	0
tG(GCC)C	SUF16	0	0	0	0	0	0	0	0	0	0	0	0
tG(GCC)D1	tG(GCC)D1	0	0	0	0	0	0	0	0	0	0	0	0
tG(GCC)D2	tG(GCC)D2	0	0	0	0	0	0	0	0	0	0	0	0
tG(GCC)E	tG(GCC)E	0	0	0	0	0	0	0	0	0	0	0	0
tG(GCC)F1	SUF20	0	0	0	0	0	0	0	0	0	0	0	0
tG(GCC)F2	tG(GCC)F2	0	0	0	0	0	0	0	0	0	0	0	0
tG(GCC)G1	tG(GCC)G1	0	0	0	0	0	0	0	0	0	0	0	0
tG(GCC)G2	tG(GCC)G2	0	0	0	0	0	0	0	0	0	0	0	0
tG(GCC)J1	tG(GCC)J1	0	0	0	0	0	0	0	0	0	0	0	0
tG(GCC)J2	tG(GCC)J2	0	0	0	0	0	0	0	0	0	0	0	0
tG(GCC)M	tG(GCC)M	0	0	0	0	0	0	0	0	0	0	0	0
tG(GCC)O1	tG(GCC)O1	0	0	0	0	0	0	0	0	0	0	0	0
tG(GCC)O2	SUF17	0	0	0	0	0	0	0	0	0	0	0	0
tG(GCC)P1	tG(GCC)P1	0	0	0	0	0	0	0	0	0	0	0	0
tG(GCC)P2	tG(GCC)P2	0	0	0	0	0	0	0	0	0	0	0	0
tG(UCC)G	SUF4	0	0	0	0	0	0	0	0	0	0	0	0
tG(UCC)N	SUF6	0	0	0	0	0	0	0	0	0	0	0	0
tG(UCC)O	SUF1	0	0	0	0	0	0	0	0	0	0	0	0
tG(UCC)Q	tG(UCC)Q	0	0	0	0	0	0	0	0	0	0	0	0
tH(GUG)E1	tH(GUG)E1	0	0	0	0	0	0	0	0	0	0	0	0
tH(GUG)E2	tH(GUG)E2	0	0	0	0	0	0	0	0	0	0	0	0
tH(GUG)G1	tH(GUG)G1	0	0	0	0	0	0	0	0	0	0	0	0
tH(GUG)G2	tH(GUG)G2	0	0	0	0	0	0	0	0	0	0	0	0
tH(GUG)H	tH(GUG)H	0	0	0	0	0	0	0	0	0	0	0	0
tH(GUG)K	tH(GUG)K	0	0	0	0	0	0	0	0	0	0	0	0
tH(GUG)M	tH(GUG)M	0	0	0	0	0	0	0	0	0	0	0	0
tH(GUG)Q	tH(GUG)Q	0	0	0	0	0	0	0	0	0	0	0	0
tI(AAU)B	tI(AAU)B	0	0	0	0	0	0	0	0	0	0	0	0
tI(AAU)D	tI(AAU)D	0	0	0	0	0	0	0	0	0	0	0	0
tI(AAU)E1	tI(AAU)E1	0	0	0	0	0	0	0	0	0	0	0	0
tI(AAU)E2	tI(AAU)E2	0	0	0	0	0	0	0	0	0	0	0	0
tI(AAU)G	tI(AAU)G	0	0	0	0	0	0	0	0	0	0	0	0
tI(AAU)I1	tI(AAU)I1	0	0	0	0	0	0	0	0	0	0	0	0
tI(AAU)I2	tI(AAU)I2	0	0	0	0	0	0	0	0	0	0	0	0
tI(AAU)L1	tI(AAU)L1	0	0	0	0	0	0	0	0	0	0	0	0
tI(AAU)L2	tI(AAU)L2	0	0	0	0	0	0	0	0	0	0	0	0
tI(AAU)N1	tI(AAU)N1	0	0	0	0	0	0	0	0	0	0	0	0
tI(AAU)N2	tI(AAU)N2	0	0	0	0	0	0	0	0	0	0	0	0
tI(AAU)P1	tI(AAU)P1	0	0	0	0	0	0	0	0	0	0	0	0
tI(AAU)P2	tI(AAU)P2	0	0	0	0	0	0	0	0	0	0	0	0
tI(GAU)Q	tI(GAU)Q	0	0	0	0	0	0	0	0	0	0	0	0
tI(UAU)D	tI(UAU)D	0	0	0	0	0	0	0	0	0	0	0	0
tI(UAU)L	tI(UAU)L	0	0	0	0	0	0	0	0	0	0	0	0
tK(CUU)C	tK(CUU)C	0	0	0	0	0	0	0	0	0	0	0	0
tK(CUU)D1	tK(CUU)D1	0	0	0	0	0	0	0	0	0	0	0	0
tK(CUU)D2	tK(CUU)D2	0	0	0	0	0	0	0	0	0	0	0	0
tK(CUU)E1	tK(CUU)E1	0	0	0	0	0	0	0	0	0	0	0	0
tK(CUU)E2	tK(CUU)E2	0	0	0	0	0	0	0	0	0	0	0	0
tK(CUU)F	tK(CUU)F	0	0	0	0	0	0	0	0	0	0	0	0
tK(CUU)G1	tK(CUU)G1	0	0	0	0	0	0	0	0	0	0	0	0
tK(CUU)G2	tK(CUU)G2	0	0	0	0	0	0	0	0	0	0	0	0
tK(CUU)G3	tK(CUU)G3	0	0	0	0	0	0	0	0	0	0	0	0
tK(CUU)I	tK(CUU)I	0	0	0	0	0	0	0	0	0	0	0	0
tK(CUU)J	tK(CUU)J	0	0	0	0	0	0	0	0	0	0	0	0
tK(CUU)K	tK(CUU)K	0	0	0	0	0	0	0	0	0	0	0	0
tK(CUU)M	tK(CUU)M	0	0	0	0	0	0	0	0	0	0	0	0
tK(CUU)P	tK(CUU)P	0	0	0	0	0	0	0	0	0	0	0	0
tK(UUU)D	tK(UUU)D	0	0	0	0	0	0	0	0	0	0	0	0
tK(UUU)G1	tK(UUU)G1	0	0	0	0	0	0	0	0	0	0	0	0
tK(UUU)G2	tK(UUU)G2	0	0	0	0	0	0	0	0	0	0	0	0
tK(UUU)K	tK(UUU)K	0	0	0	0	0	0	0	0	0	0	0	0
tK(UUU)L	tK(UUU)L	0	0	0	0	0	0	0	0	0	0	0	0
tK(UUU)O	tK(UUU)O	0	0	0	0	0	0	0	0	0	0	0	0
tK(UUU)P	tK(UUU)P	0	0	0	0	0	0	0	0	0	0	0	0
tK(UUU)Q	tK(UUU)Q	0	0	0	0	0	0	0	0	0	0	0	0
tL(CAA)A	SUP56	0	0	0	0	0	0	0	0	0	0	0	0
tL(CAA)C	SUP53	0	0	0	0	0	0	0	0	0	0	0	0
tL(CAA)D	tL(CAA)D	0	0	0	0	0	0	0	0	0	0	0	0
tL(CAA)G1	tL(CAA)G1	0	0	0	0	0	0	0	0	0	0	0	0
tL(CAA)G2	SUP54	0	0	0	0	0	0	0	0	0	0	0	0
tL(CAA)G3	tL(CAA)G3	0	0	0	0	0	0	0	0	0	0	0	0
tL(CAA)K	tL(CAA)K	0	0	0	0	0	0	0	0	0	0	0	0
tL(CAA)L	tL(CAA)L	0	0	0	0	0	0	0	0	0	0	0	0
tL(CAA)M	tL(CAA)M	0	0	0	0	0	0	0	0	0	0	0	0
tL(CAA)N	tL(CAA)N	0	0	0	0	0	0	0	0	0	0	0	0
tL(GAG)G	tL(GAG)G	0	0	0	0	0	0	0	0	0	0	0	0
tL(UAA)B1	tL(UAA)B1	0	0	0	0	0	0	0	0	0	0	0	0
tL(UAA)B2	tL(UAA)B2	0	0	0	0	0	0	0	0	0	0	0	0
tL(UAA)D	tL(UAA)D	0	0	0	0	0	0	0	0	0	0	0	0
tL(UAA)J	SUP51	0	0	0	0	0	0	0	0	0	0	0	0
tL(UAA)K	tL(UAA)K	0	0	0	0	0	0	0	0	0	0	0	0
tL(UAA)L	tL(UAA)L	0	0	0	0	0	0	0	0	0	0	0	0
tL(UAA)N	tL(UAA)N	0	0	0	0	0	0	0	0	0	0	0	0
tL(UAA)Q	tL(UAA)Q	0	0	0	0	0	0	0	0	0	0	0	0
tL(UAG)J	tL(UAG)J	0	0	0	0	0	0	0	0	0	0	0	0
tL(UAG)L1	tL(UAG)L1	0	0	0	0	0	0	0	0	0	0	0	0
tL(UAG)L2	tL(UAG)L2	0	0	0	0	0	0	0	0	0	0	0	0
TLC1	TLC1	160.553	164.022	146.508	52.5008	48.3052	45.1296	92.5558	96.3153	102.471	24.1339	20.3136	18.2105
tM(CAU)C	tM(CAU)C	0	0	0	0	0	0	0	0	0	0	0	0
tM(CAU)D	EMT1	0	0	0	0	0	0	0	0	0	0	0	0
tM(CAU)E	IMT4	0	0	0	0	0	0	0	0	0	0	0	0
tM(CAU)J1	EMT5	0	0	0	0	0	0	0	0	0	0	0	0
tM(CAU)J2	EMT3	0	0	0	0	0	0	0	0	0	0	0	0
tM(CAU)J3	IMT3	0	0	0	0	0	0	0	0	0	0	0	0
tM(CAU)M	EMT4	0	0	0	0	0	0	0	0	0	0	0	0
tM(CAU)O1	IMT1	0	0	0	0	0	0	0	0	0	0	0	0
tM(CAU)O2	EMT2	0	0	0	0	0	0	0	0	0	0	0	0
tM(CAU)P	IMT2	0	0	0	0	0	0	0	0	0	0	0	0
tM(CAU)Q1	tM(CAU)Q1	0	0	0	0	0	0	0	0	0	0	0	0
tM(CAU)Q2	tM(CAU)Q2	0	0	0	0	0	0	0	0	0	0	0	0
tN(GUU)C	tN(GUU)C	0	0	0	0	0	0	0	0	0	0	0	0
tN(GUU)F	tN(GUU)F	0	0	0	0	0	0	0	0	0	0	0	0
tN(GUU)G	tN(GUU)G	0	0	0	0	0	0	0	0	0	0	0	0
tN(GUU)K	tN(GUU)K	0	0	0	0	0	0	0	0	0	0	0	0
tN(GUU)L	tN(GUU)L	0	0	0	0	0	0	0	0	0	0	0	0
tN(GUU)N1	tN(GUU)N1	0	0	0	0	0	0	0	0	0	0	0	0
tN(GUU)N2	tN(GUU)N2	0	0	0	0	0	0	0	0	0	0	0	0
tN(GUU)O1	tN(GUU)O1	0	0	0	0	0	0	0	0	0	0	0	0
tN(GUU)O2	tN(GUU)O2	0	0	0	0	0	0	0	0	0	0	0	0
tN(GUU)P	tN(GUU)P	0	0	0	0	0	0	0	0	0	0	0	0
tN(GUU)Q	tN(GUU)Q	0	0	0	0	0	0	0	0	0	0	0	0
tP(AGG)C	SUF2	0	0	0	0	0	0	0	0	0	0	0	0
tP(AGG)N	SUF10	0	0	0	0	0	0	0	0	0	0	0	0
tP(UGG)A	TRN1	0	0	0	0	0	0	0	0	0	0	0	0
tP(UGG)F	SUF9	0	0	0	0	0	0	0	0	0	0	0	0
tP(UGG)H	SUF8	0	0	0	0	0	0	0	0	0	0	0	0
tP(UGG)L	tP(UGG)L	0	0	0	0	0	0	0	0	0	0	0	0
tP(UGG)M	SUF7	0	0	0	0	0	0	0	0	0	0	0	0
tP(UGG)N1	tP(UGG)N1	0	0	0	0	0	0	0	0	0	0	0	0
tP(UGG)N2	tP(UGG)N2	0	0	0	0	0	0	0	0	0	0	0	0
tP(UGG)O1	tP(UGG)O1	0	0	0	0	0	0	0	0	0	0	0	0
tP(UGG)O2	SUF11	0	0	0	0	0	0	0	0	0	0	0	0
tP(UGG)O3	tP(UGG)O3	0	0	0	0	0	0	0	0	0	0	0	0
tP(UGG)Q	tP(UGG)Q	0	0	0	0	0	0	0	0	0	0	0	0
tQ(CUG)M	CDC65	0	0	0	0	0	0	0	0	0	0	0	0
tQ(UUG)B	tQ(UUG)B	0	0	0	0	0	0	0	0	0	0	0	0
tQ(UUG)C	tQ(UUG)C	0	0	0	0	0	0	0	0	0	0	0	0
tQ(UUG)D1	tQ(UUG)D1	0	0	0	0	0	0	0	0	0	0	0	0
tQ(UUG)D2	tQ(UUG)D2	0	0	0	0	0	0	0	0	0	0	0	0
tQ(UUG)D3	tQ(UUG)D3	0	0	0	0	0	0	0	0	0	0	0	0
tQ(UUG)E1	tQ(UUG)E1	0	0	0	0	0	0	0	0	0	0	0	0
tQ(UUG)E2	tQ(UUG)E2	0	0	0	0	0	0	0	0	0	0	0	0
tQ(UUG)H	tQ(UUG)H	0	0	0	0	0	0	0	0	0	0	0	0
tQ(UUG)L	tQ(UUG)L	0	0	0	0	0	0	0	0	0	0	0	0
tQ(UUG)Q	tQ(UUG)Q	0	0	0	0	0	0	0	0	0	0	0	0
tR(ACG)D	tR(ACG)D	0	0	0	0	0	0	0	0	0	0	0	0
tR(ACG)E	tR(ACG)E	0	0	0	0	0	0	0	0	0	0	0	0
tR(ACG)J	tR(ACG)J	0	0	0	0	0	0	0	0	0	0	0	0
tR(ACG)K	tR(ACG)K	0	0	0	0	0	0	0	0	0	0	0	0
tR(ACG)L	tR(ACG)L	0	0	0	0	0	0	0	0	0	0	0	0
tR(ACG)O	tR(ACG)O	0	0	0	0	0	0	0	0	0	0	0	0
tR(ACG)Q2	tR(ACG)Q2	0	0	0	0	0	0	0	0	0	0	0	0
tR(CCG)L	TRR4	0	0	0	0	0	0	0	0	0	0	0	0
tR(CCU)J	HSX1	0	0	0	0	0	0	0	0	0	0	0	0
tR(UCU)B	tR(UCU)B	0	0	0	0	0	0	0	0	0	0	0	0
tR(UCU)D	tR(UCU)D	0	0	0	0	0	0	0	0	0	0	0	0
tR(UCU)E	tR(UCU)E	0	0	0	0	0	0	0	0	0	0	0	0
tR(UCU)G1	tR(UCU)G1	0	0	0	0	0	0	0	0	0	0	0	0
tR(UCU)G2	tR(UCU)G2	0	0	0	0	0	0	0	0	0	0	0	0
tR(UCU)G3	tR(UCU)G3	0	0	0	0	0	0	0	0	0	0	0	0
tR(UCU)J1	tR(UCU)J1	0	0	0	0	0	0	0	0	0	0	0	0
tR(UCU)J2	tR(UCU)J2	0	0	0	0	0	0	0	0	0	0	0	0
tR(UCU)K	tR(UCU)K	0	0	0	0	0	0	0	0	0	0	0	0
tR(UCU)M1	tR(UCU)M1	0	0	0	0	0	0	0	0	0	0	0	0
tR(UCU)M2	tR(UCU)M2	0	0	0	0	0	0	0	0	0	0	0	0
tR(UCU)Q1	tR(UCU)Q1	0	0	0	0	0	0	0	0	0	0	0	0
tS(AGA)A	tS(AGA)A	0	0	0	0	0	0	0	0	0	0	0	0
tS(AGA)B	tS(AGA)B	0	0	0	0	0	0	0	0	0	0	0	0
tS(AGA)D1	tS(AGA)D1	0	0	0	0	0	0	0	0	0	0	0	0
tS(AGA)D2	tS(AGA)D2	0	0	0	0	0	0	0	0	0	0	0	0
tS(AGA)D3	tS(AGA)D3	0	0	0	0	0	0	0	0	0	0	0	0
tS(AGA)E	tS(AGA)E	0	0	0	0	0	0	0	0	0	0	0	0
tS(AGA)G	tS(AGA)G	0	0	0	0	0	0	0	0	0	0	0	0
tS(AGA)H	tS(AGA)H	0	0	0	0	0	0	0	0	0	0	0	0
tS(AGA)J	tS(AGA)J	0	0	0	0	0	0	0	0	0	0	0	0
tS(AGA)L	tS(AGA)L	0	0	0	0	0	0	0	0	0	0	0	0
tS(AGA)M	tS(AGA)M	0	0	0	0	0	0	0	0	0	0	0	0
tS(CGA)C	SUP61	0	0	0	0	0	0	0	0	0	0	0	0
tS(GCU)F	tS(GCU)F	0	0	0	0	0	0	0	0	0	0	0	0
tS(GCU)L	tS(GCU)L	0	0	0	0	0	0	0	0	0	0	0	0
tS(GCU)O	tS(GCU)O	0	0	0	0	0	0	0	0	0	0	0	0
tS(GCU)Q1	tS(GCU)Q1	0	0	0	0	0	0	0	0	0	0	0	0
tS(UGA)E	SUP19	0	0	0	0	0	0	0	0	0	0	0	0
tS(UGA)I	SUP17	0	0	0	0	0	0	0	0	0	0	0	0
tS(UGA)P	SUP16	0	0	0	0	0	0	0	0	0	0	0	0
tS(UGA)Q2	tS(UGA)Q2	0	0	0	0	0	0	0	0	0	0	0	0
tT(AGU)B	tT(AGU)B	0	0	0	0	0	0	0	0	0	0	0	0
tT(AGU)C	tT(AGU)C	0	0	0	0	0	0	0	0	0	0	0	0
tT(AGU)D	tT(AGU)D	0	0	0	0	0	0	0	0	0	0	0	0
tT(AGU)H	tT(AGU)H	0	0	0	0	0	0	0	0	0	0	0	0
tT(AGU)I1	tT(AGU)I1	0	0	0	0	0	0	0	0	0	0	0	0
tT(AGU)I2	tT(AGU)I2	0	0	0	0	0	0	0	0	0	0	0	0
tT(AGU)J	tT(AGU)J	0	0	0	0	0	0	0	0	0	0	0	0
tT(AGU)N1	tT(AGU)N1	0	0	0	0	0	0	0	0	0	0	0	0
tT(AGU)N2	tT(AGU)N2	0	0	0	0	0	0	0	0	0	0	0	0
tT(AGU)O1	tT(AGU)O1	0	0	0	0	0	0	0	0	0	0	0	0
tT(AGU)O2	tT(AGU)O2	0	0	0	0	0	0	0	0	0	0	0	0
tT(CGU)K	TRT2	0	0	0	0	0	0	0	0	0	0	0	0
tT(UGU)G1	tT(UGU)G1	0	0	0	0	0	0	0	0	0	0	0	0
tT(UGU)G2	tT(UGU)G2	0	0	0	0	0	0	0	0	0	0	0	0
tT(UGU)H	tT(UGU)H	0	0	0	0	0	0	0	0	0	0	0	0
tT(UGU)P	tT(UGU)P	0	0	0	0	0	0	0	0	0	0	0	0
tT(UGU)Q1	tT(UGU)Q1	0	0	0	0	0	0	0	0	0	0	0	0
tT(XXX)Q2	tT(XXX)Q2	0	0	0	0	0	0	0	0	0	0	0	0
tV(AAC)E1	tV(AAC)E1	0	0	0	0	0	0	0	0	0	0	0	0
tV(AAC)E2	tV(AAC)E2	0	0	0	0	0	0	0	0	0	0	0	0
tV(AAC)G1	tV(AAC)G1	0	0	0	0	0	0	0	0	0	0	0	0
tV(AAC)G2	tV(AAC)G2	0	0	0	0	0	0	0	0	0	0	0	0
tV(AAC)G3	tV(AAC)G3	0	0	0	0	0	0	0	0	0	0	0	0
tV(AAC)H	tV(AAC)H	0	0	0	0	0	0	0	0	0	0	0	0
tV(AAC)J	tV(AAC)J	0	0	0	0	0	0	0	0	0	0	0	0
tV(AAC)K1	tV(AAC)K1	0	0	0	0	0	0	0	0	0	0	0	0
tV(AAC)K2	tV(AAC)K2	0	0	0	0	0	0	0	0	0	0	0	0
tV(AAC)L	tV(AAC)L	0	0	0	0	0	0	0	0	0	0	0	0
tV(AAC)M1	tV(AAC)M1	0	0	0	0	0	0	0	0	0	0	0	0
tV(AAC)M2	tV(AAC)M2	0	0	0	0	0	0	0	0	0	0	0	0
tV(AAC)M3	tV(AAC)M3	0	0	0	0	0	0	0	0	0	0	0	0
tV(AAC)O	tV(AAC)O	0	0	0	0	0	0	0	0	0	0	0	0
tV(CAC)D	tV(CAC)D	0	0	0	0	0	0	0	0	0	0	0	0
tV(CAC)H	tV(CAC)H	0	0	0	0	0	0	0	0	0	0	0	0
tV(UAC)B	tV(UAC)B	0	0	0	0	0	0	0	0	0	0	0	0
tV(UAC)D	tV(UAC)D	0	0	0	0	0	0	0	0	0	0	0	0
tV(UAC)Q	tV(UAC)Q	0	0	0	0	0	0	0	0	0	0	0	0
tW(CCA)G1	tW(CCA)G1	0	0	0	0	0	0	0	0	0	0	0	0
tW(CCA)G2	tW(CCA)G2	0	0	0	0	0	0	0	0	0	0	0	0
tW(CCA)J	tW(CCA)J	0	0	0	0	0	0	0	0	0	0	0	0
tW(CCA)K	tW(CCA)K	0	0	0	0	0	0	0	0	0	0	0	0
tW(CCA)M	tW(CCA)M	0	0	0	0	0	0	0	0	0	0	0	0
tW(CCA)P	tW(CCA)P	0	0	0	0	0	0	0	0	0	0	0	0
tW(UCA)Q	tW(UCA)Q	0	0	0	0	0	0	0	0	0	0	0	0
tX(XXX)D	tX(XXX)D	0	0	0	0	0	0	0	0	0	0	0	0
tY(GUA)D	SUP2	0	0	0	0	0	0	0	0	0	0	0	0
tY(GUA)F1	SUP11	0	0	0	0	0	0	0	0	0	0	0	0
tY(GUA)F2	SUP6	0	0	0	0	0	0	0	0	0	0	0	0
tY(GUA)J1	SUP7	0	0	0	0	0	0	0	0	0	0	0	0
tY(GUA)J2	SUP4	0	0	0	0	0	0	0	0	0	0	0	0
tY(GUA)M1	SUP5	0	0	0	0	0	0	0	0	0	0	0	0
tY(GUA)M2	SUP8	0	0	0	0	0	0	0	0	0	0	0	0
tY(GUA)O	SUP3	0	0	0	0	0	0	0	0	0	0	0	0
tY(GUA)Q	tY(GUA)Q	0	0	0	0	0	0	0	0	0	0	0	0
YAL001C	TFC3	24.2325	25.5206	25.5996	27.3202	27.5292	30.5679	22.4952	24.8181	21.9089	27.5282	24.5677	28.3486
YAL002W	VPS8	14.4144	14.8436	16.5467	26.1076	29.2417	30.1314	14.8747	15.3221	12.8264	26.5131	24.6042	27.6234
YAL003W	EFB1	3958.62	3973.89	3954.84	2775.31	2722.77	2426.29	4966	4937.17	5063.4	5089.42	5869.06	5554.15
YAL004W	YAL004W	0.920746	0	0.314236	0	0.394667	0.296501	0.422215	0.754035	0.973483	0.666661	1.3049	1.37256
YAL005C	SSA1	1651.99	1372.93	1461.85	3224.04	3624.61	3180.96	5600.55	5828.19	5654.99	11645.9	10895.5	11871.4
YAL007C	ERP2	220.453	233.416	214.623	177.424	172.338	169.005	201.819	215.051	208.65	136.332	146.475	128.335
YAL008W	FUN14	60.0796	52.2492	55.1885	140.503	179.904	172.519	42.6209	44.652	59.1404	177.657	177.685	203.526
YAL009W	SPO7	47.5387	42.2556	45.8718	61.2556	69.5131	64.5458	39.5496	42.5463	43.2209	68.3944	65.7787	67.8524
YAL010C	MDM10	17.657	19.99	20.2183	29.7175	29.3132	30.6204	19.4407	18.3159	17.7749	36.4721	30.3965	35.5746
YAL011W	SWC3	26.3354	24.6723	24.7253	26.0342	27.5605	29.598	23.3971	23.9601	23.6018	21.6165	25.9037	22.3385
YAL012W	CYS3	418.238	416.111	458.861	375.585	358.755	374.172	464.422	485.398	450.564	227.609	309.638	252.46
YAL013W	DEP1	46.7211	37.3051	48.5539	37.6793	49.2373	42.7485	34.2027	38.5416	45.4147	36.6801	43.7531	40.4582
YAL014C	SYN8	77.9208	68.4639	81.5007	86.8283	83.325	86.1503	77.0645	82.9331	88.5685	99.812	112.092	112.681
YAL015C	NTG1	39.9704	35.038	40.6058	71.0834	75.5474	67.6303	31.1192	32.658	35.2912	56.0132	60.513	54.548
YAL016C-A	YAL016C-A	1.66986	0	0	0	0	0	0	0	0	0	0	0
YAL016C-B	YAL016C-B	0	0	0	0	0	0	0	0	0	0	0	0
YAL016W	TPD3	110.585	113.613	118.106	142.63	145.489	152	104.433	109.096	105.057	176.625	154.931	162.781
YAL017W	PSK1	20.6055	19.7194	21.021	34.7531	43.3779	44.4729	19.374	18.9289	16.7791	51.9347	41.8101	53.5355
YAL018C	YAL018C	0	0	0	0	0.138692	0.154242	0	0	0	0.170033	0.496363	0
YAL019W	FUN30	29.2267	31.5155	31.1968	33.9649	27.7387	32.6539	36.0734	34.5281	32.0192	16.7816	18.5862	11.2276
YAL019W-A	YAL019W-A	0	0	0	0	0.667691	0	0.359125	0.385344	0	0	0.42319	0
YAL020C	ATS1	32.8474	31.1992	27.0605	31.5612	58.9953	50.3758	27.3971	24.7367	49.2717	37.1054	48.398	32.0935
YAL021C	CCR4	48.6471	44.894	49.3783	54.0967	55.1768	54.335	55.1473	46.9545	46.3716	50.2263	46.9141	42.4299
YAL022C	FUN26	54.4174	51.2469	52.1767	65.3241	67.6973	64.2993	53.9647	48.1421	48.1555	60.7671	60.4807	58.5113
YAL023C	PMT2	175.294	178.586	179.013	156.886	150.658	163.808	208.767	174.046	150.739	113.105	108.729	104.877
YAL024C	LTE1	9.51542	10.8883	10.2461	11.3309	10.1643	11.4063	11.625	10.4131	10.3106	11.4427	10.2902	9.74115
YAL025C	MAK16	167.768	191.355	174.595	172.702	126.636	136.057	172.443	188.347	163.149	27.1198	60.7656	20.9279
YAL026C	DRS2	26.4717	29.5607	24.6294	28.9956	27.9033	32.8595	31.0768	28.8093	26.8079	32.4354	29.7174	27.894
YAL026C-A	YAL026C-A	25.6194	36.9954	30.0301	15.7271	31.4819	32.9345	21.3299	11.6238	20.9457	25.0477	19.0525	22.5232
YAL027W	SAW1	32.4054	26.7776	32.5687	39.5954	37.1186	39.7994	22.1822	28.9652	32.562	20.9286	26.4448	31.9108
YAL028W	FRT2	7.82287	7.77121	10.434	17.2237	24.0696	20.7786	6.63277	7.50015	8.40161	26.4318	24.1744	33.0397
YAL029C	MYO4	31.3385	33.5692	30.2389	43.3295	35.9918	40.0084	36.5288	34.0114	31.0762	32.4932	33.2953	23.8005
YAL030W	SNC1	170.661	167.211	207.046	347.562	371.459	378.797	132.594	137.699	137.077	422.128	396.732	387.369
YAL031C	GIP4	27.1975	26.7846	28.2859	31.7633	36.1464	35.4006	25.558	25.3842	23	40.2299	33.4388	38.2787
YAL031W-A	YAL031W-A	0	0	0	2.66342	0	0	0	0	0	0	0	0
YAL032C	PRP45	35.3983	28.2499	35.5108	31.3714	33.093	29.2119	26.1724	31.5294	31.2304	29.8806	32.373	35.3254
YAL033W	POP5	73.2201	74.63	79.7218	56.4166	54.7696	58.4637	62.6549	66.6251	71.9612	24.1352	28.4384	44.6303
YAL034C	FUN19	20.7336	19.1728	23.4974	27.23	36.7783	31.4313	21.1433	21.9093	25.8709	55.9471	49.6027	65.7734
YAL034C-B	YAL034C-B	0	0	0	1.60167	0	0	0	0	0	0.837555	0	1.72932
YAL034W-A	MTW1	27.3213	26.1691	27.1151	23.6344	25.2692	20.676	23.335	24.7737	23.0677	11.5426	16.9656	14.2266
YAL035W	FUN12	202.237	232.697	217.395	198.903	161.821	195.269	233.047	217.585	196.555	129.538	139.825	98.3731
YAL036C	RBG1	122.673	142.817	135.861	146.039	111.149	131.476	127.129	133.364	127.856	44.0732	57.9783	30.3091
YAL037C-A	YAL037C-A	0	0	0	0	0	0	0	0	0	0	0	0
YAL037C-B	YAL037C-B	0.699138	0.91764	1.15783	1.08153	0.417871	0.619669	0.295063	0.473209	1.0306	0.341588	0.498597	0.353223
YAL037W	YAL037W	6.11156	4.8842	7.03553	6.72829	7.57511	7.22676	5.49946	6.72524	10.0253	6.41916	7.82414	8.75714
YAL038W	CDC19	6146.23	5918.21	6209.68	4260.4	3885.13	3906.13	6475.46	5892.56	5448.46	3343.99	3687.37	3481.68
YAL039C	CYC3	54.2017	38.8267	59.7711	94.533	104.303	101.844	42.7135	47.7804	50.2345	44.4009	69.1331	38.1238
YAL040C	CLN3	45.5376	52.257	51.9139	65.9117	66.6256	74.1165	59.9833	52.4455	50.7443	42.1552	41.8556	40.772
YAL041W	CDC24	42.6572	41.9025	43.3163	63.1621	60.0027	61.2546	44.7413	46.7812	40.2701	65.9136	60.2383	61.0808
YAL042C-A	YAL042C-A	0	0	0	1.28078	2.78052	3.2715	0	0	1.13327	3.98579	1.34143	4.08693
YAL042W	ERV46	245.557	226.557	248.565	220.083	217.602	203.356	229.117	203.057	209.877	152.087	170.26	143.345
YAL043C	PTA1	40.475	39.4334	44.8871	50.3619	49.8404	47.1475	46.4728	42.5502	43.076	49.8032	46.4309	46.053
YAL044C	GCV3	552.969	444.025	549.333	1584.06	1568.64	1493.61	405.559	448.943	469.249	1474.23	1876.02	1918.89
YAL044W-A	YAL044W-A	287.952	184.62	215.361	265.961	306.949	251.119	169.597	198.007	246.558	243.473	311.271	293.449
YAL045C	YAL045C	0	0	0	0	0	2.22394	2.10076	2.31629	0	0	0	0
YAL046C	AIM1	170.363	136.867	172.622	237.898	221.262	197.838	144.897	137.732	182.273	136.486	235.974	160.851
YAL047C	SPC72	16.0009	17.2292	15.7123	17.898	19.9194	24.0552	14.8748	16.7034	13.9709	24.0833	23.1425	25.8064
YAL047W-A	YAL047W-A	0	1.68835	0	4.13714	2.95175	0	0	0	1.78016	0	0	0
YAL048C	GEM1	12.485	12.5519	13.735	23.5337	20.6445	23.6049	13.4083	13.1063	12.5009	19.7843	20.9627	18.9657
YAL049C	AIM2	80.5619	82.7304	87.5733	147.911	145.226	146.379	70.2468	73.0444	78.4776	129.071	130.485	140.434
YAL051W	OAF1	22.1957	22.5257	24.0219	33.9599	33.1536	34.385	21.1543	21.023	19.8353	28.4954	26.8797	26.5386
YAL053W	FLC2	56.208	55.678	57.0588	133.812	114.311	130.2	61.3417	58.7685	58.8106	119.335	127.315	96.9014
YAL054C	ACS1	3.13993	2.38278	2.76665	17.1245	19.2859	21.2536	3.22583	2.56819	2.62803	12.8392	12.7486	16.0965
YAL055W	PEX22	56.1066	48.4432	57.8428	75.2053	92.0054	97.2538	35.9185	45.5995	45.8339	49.3562	58.4596	64.8835
YAL056C-A	YAL056C-A	1.14714	0	0	0	0	0	1.31318	0	0	0	0	0
YAL056W	GPB2	34.7745	36.0037	35.6133	29.2097	33.2197	33.6361	35.49	34.595	34.1931	39.571	35.4954	37.7551
YAL058W	CNE1	23.172	24.4571	22.9435	39.9434	39.4594	42.6936	24.3239	22.6096	22.1431	30.2351	34.6958	33.2029
YAL059C-A	YAL059C-A	0	0	0	0.906086	0	0	0	0	0.817681	0	0.921306	0
YAL059W	ECM1	129.412	151.816	139.84	97.7308	74.4396	79.9907	122.548	146.181	146.69	21.2219	34.3476	17.2616
YAL060W	BDH1	159.271	135.869	143.735	403.553	448.812	415.304	119.782	139.704	131.457	323.489	264.975	376.874
YAL061W	BDH2	52.9955	29.7083	65.9679	57.7512	97.3971	96.9173	16.2638	27.6905	28.3095	71.5227	56.0028	98.2917
YAL062W	GDH3	8.80799	6.00222	9.53897	17.6495	18.4927	20.5555	5.36678	8.07591	8.94671	23.3434	25.5238	24.4032
YAL063C	FLO9	2.02464	1.37058	2.17476	3.08108	3.46413	3.15376	1.90905	1.67697	1.57634	3.5816	3.84268	3.66806
YAL063C-A	YAL063C-A	0	2.71577	2.91472	3.38381	2.409	0	0	0	0	0	3.63203	0
YAL064C-A	YAL064C-A	0	0	0	0	0	0	0.998484	0	0	0	0	0
YAL064W	YAL064W	1.46117	0	1.85669	0	0	0	0	0	0	0	2.30261	0
YAL064W-B	YAL064W-B	0.884546	1.03208	1.09819	1.24807	7.23263	2.12621	0.998484	4.33753	1.106	3.87936	5.21826	3.97564
YAL065C	YAL065C	0.421993	0	0	1.78003	0.430667	2.52902	1.4255	0	0	0.613245	1.23539	1.25576
YAL066W	YAL066W	0	0	0	0	0	0	0	0	0	0	0	0
YAL067C	SEO1	0.583652	0.281571	0.457573	0.827166	1.28889	1.42224	1.56052	1.44894	2.14552	2.86794	2.02988	2.6519
YAL067W-A	YAL067W-A	0	0	0	0	0	0	0	0	0	0	0	0
YAL068C	PAU8	0	0	0	0	0	1.24638	0	0.318647	0	0	0	1.57536
YAL068W-A	YAL068W-A	0	0	0	0	0	0	0	0	0	0	0	0
YAL069W	YAL069W	0	0	0	0	0	0	0	0	0	0	0	0
YAR002C-A	ERP1	415.881	442.234	444.124	329.631	352.389	331.923	353.308	375.9	364.208	183.269	201.977	209.283
YAR002W	NUP60	72.3822	76.9727	73.6273	81.1042	81.627	82.9664	67.1198	70.1343	67.5169	52.4081	50.2576	48.2742
YAR003W	SWD1	53.5632	49.6512	51.9173	40.3576	41.099	42.2931	50.3232	49.7289	48.0559	37.4113	41.6904	38.6219
YAR007C	RFA1	75.9791	71.447	75.8219	87.1546	84.1005	85.9694	68.4769	76.1313	70.8897	98.572	94.7399	87.3016
YAR008W	SEN34	52.0768	51.1491	52.7476	29.3842	27.2064	29.1951	44.4807	46.7856	54.466	21.4372	27.079	16.7163
YAR009C	YAR009C	63.417	71.764	66.605	108.558	97.6007	101.686	63.3506	67.6455	55.7672	67.2626	74.9557	73.336
YAR010C	YAR010C	32.0844	29.9956	29.9128	45.038	48.1404	45.5634	23.5822	33.6945	28.1895	33.1085	38.3787	32.7779
YAR014C	BUD14	52.8423	55.0544	57.1161	70.4489	58.0552	65.2544	53.5548	55.2864	51.8439	65.5865	68.9513	63.9772
YAR015W	ADE1	235.361	294.252	278.131	216.048	168.698	199.293	178.368	195.881	186.988	209.9	256.084	191.231
YAR018C	KIN3	35.4047	32.5692	32.9173	25.9485	27.7782	25.8492	39.0539	30.7874	31.5827	33.0953	25.8237	29.9034
YAR019C	CDC15	11.1679	11.2902	11.4178	16.5301	18.8459	18.9637	12.0706	10.9952	10.423	24.2993	23.583	29.434
YAR019W-A	YAR019W-A	0	0	0	0	0	0	0	0	0	0	0	0
YAR020C	PAU7	24.373	0	34.3844	79.6954	62.1801	30.5182	0	0	31.4436	0	0	45.0782
YAR023C	YAR023C	12.6096	16.6148	12.0609	24.7088	25.313	22.9062	6.42516	14.6618	10.5572	26.2014	30.5588	29.8595
YAR027W	UIP3	71.1052	66.9719	67.9671	139.803	182.103	168.099	56.22	59.4263	65.0031	116.07	115.892	144.221
YAR028W	YAR028W	25.5401	33.9779	31.5097	22.6257	23.009	28.3896	23.8162	22.9012	27.2525	32.8803	31.2874	27.7028
YAR029W	YAR029W	6.27491	23.1023	25.8207	9.98367	22.0553	15.8221	38.7453	0	8.06669	9.70267	40.0345	68.6752
YAR030C	YAR030C	2.50273	1.48502	1.57791	0	0	0	4.31789	3.14806	1.57155	0	1.93867	0
YAR031W	PRM9	11.4129	12.3331	10.9086	16.9874	18.2008	18.9693	15.727	20.0238	14.415	17.9746	20.7047	22.8695
YAR033W	MST28	27.1364	22.9036	28.7934	29.1753	27.2235	26.855	18.2267	24.5927	21.7739	15.8683	18.2975	16.0617
YAR035C-A	YAR035C-A	0	0	0	0	0	0	0	0	0	0	0	0
YAR035W	YAT1	2.13004	1.77668	2.18199	3.61728	8.73533	7.77485	2.22597	1.64521	3.27815	5.07696	6.62594	2.56518
YAR042W	SWH1	22.9018	22.268	23.3789	44.9938	44.4346	52.8834	24.8559	23.6542	20.5139	38.8425	38.8764	38.5141
YAR047C	YAR047C	0	0	0	2.29738	4.90931	0	0	3.99282	1.96558	0	2.47403	2.53658
YAR050W	FLO1	2.29642	2.48701	2.61898	2.64778	2.37257	3.07831	2.16953	1.64208	1.60906	1.60516	1.4232	1.85487
YAR053W	YAR053W	0	2.50902	0	0	0	0	0	0	0	4.87172	0	3.49451
YAR060C	YAR060C	1.32935	3.16365	1.68118	1.93421	5.52747	3.2634	2.30107	3.35976	2.50627	2.0297	0	4.22767
YAR061W	YAR061W	0	0	0	0	0	0	0	0	0	0	0	0
YAR062W	YAR062W	0.152486	0	0.182743	0.201293	0.15272	0.172864	0	0	0	0.326096	0.383768	0.201112
YAR064W	YAR064W	0	0	0	0	0	0	0	0	0	0	0	0
YAR066W	YAR066W	5.09825	7.76755	6.8009	12.2823	5.83288	7.58174	4.69062	6.87282	4.49602	2.41984	4.74311	2.67994
YAR068W	YAR068W	11.4054	5.26223	11.2901	16.3357	6.32815	9.15984	3.56248	5.2027	8.08688	3.75199	6.80354	4.79869
YAR069C	YAR069C	0	1.3048	1.39877	0	0	0	0	0	0	0	0	0
YAR070C	YAR070C	0	0	0	0	0	0	0	0	0	0	0	0
YAR071W	PHO11	33.6013	36.8362	39.1736	24.4867	24.0274	27.9549	26.8393	15.8141	15.929	16.457	16.3308	15.7003
YAR073W	IMD1	2.45304	1.99083	1.97016	0.401666	0.363525	0.230172	0.713029	1.28933	0.896533	0.252386	0	0.326634
YAR075W	YAR075W	1.47975	1.11801	0.599241	0	0.24857	0.572755	0.270327	0	1.53112	0	0	0.341263
YBL001C	ECM15	534.634	486.257	590.815	1408.34	1577.46	1363.15	470.232	594.95	487.447	1179.86	1335.29	1384.55
YBL002W	HTB2	2044.73	2158.11	2055.95	485.605	506.98	488.79	1552.04	1551.24	1725.24	374.424	470.498	383.54
YBL003C	HTA2	1679.96	1798.47	1683.5	345.005	414.434	404.937	1414.36	1306.52	1581.15	399.118	395.796	388.835
YBL004W	UTP20	20.0889	26.6371	23.0693	15.2499	8.15748	10.6352	26.8934	24.6694	21.1602	4.32421	5.35885	2.46914
YBL005W	PDR3	35.7449	29.2959	38.9222	31.0695	26.8723	34.9088	22.8974	25.7678	20.3937	26.1188	26.1059	21.9233
YBL005W-A	YBL005W-A	8.50377e-07	6.27705e-07	9.67962e-07	2.28868e-07	5.03668e-07	2.0457e-07	2.97133e-07	4.40825e-07	5.09437e-07	3.63336e-07	3.389e-07	1.90229e-07
YBL005W-B	YBL005W-B	41.2231	44.321	43.6227	65.3626	59.0583	63.066	39.1827	43.8618	35.7957	40.9692	44.664	39.4242
YBL006C	LDB7	147.234	118.44	170.879	138.934	133.96	143.785	100.016	129.128	121.165	145.433	151.571	134.682
YBL006W-A	YBL006W-A	0	56.4502	65.6521	0	0	115.893	0	0	0	66.9679	0	85.52
YBL007C	SLA1	60.8234	60.3901	63.015	78.2922	75.9472	81.1305	69.7277	62.5598	56.8738	101.273	82.0881	93.2726
YBL008W	HIR1	21.4667	21.7919	23.0084	27.6301	25.8918	27.8419	22.2694	22.1724	20.858	24.2111	26.1131	23.4052
YBL008W-A	YBL008W-A	4.79872	0	0	0	5.49823	0	0	0	0	0	0	0
YBL009W	ALK2	33.9429	40.9429	37.7293	27.644	22.7198	25.0464	39.4884	39.1157	33.4676	17.9432	17.7504	13.621
YBL010C	YBL010C	38.195	34.2521	32.9252	35.5095	43.3331	41.6447	32.87	36.1407	32.4447	34.8753	31.9146	29.9811
YBL011W	SCT1	60.3724	57.1877	58.0589	58.8476	57.0111	58.5923	69.2072	65.7017	55.8557	77.5094	71.1375	72.2836
YBL012C	YBL012C	0	0	0	0	0	0	0	0	0	0	0	0
YBL013W	FMT1	4.41247	4.58017	4.83353	5.25588	7.21307	6.60288	3.64365	4.36522	4.76953	4.70022	5.55418	4.86624
YBL014C	RRN6	22.576	27.7367	24.5954	27.9761	21.2499	26.18	25.9873	26.6988	21.8348	22.9484	25.5451	19.6681
YBL015W	ACH1	33.6434	29.8058	31.9313	46.5578	51.5606	55.0645	27.9869	34.2424	31.2844	48.0431	45.2687	61.1356
YBL016W	FUS3	60.7978	65.8509	62.7236	105.87	96.3712	98.1421	31.6903	44.651	45.7953	28.8753	45.8676	31.5175
YBL017C	PEP1	37.6468	43.5587	41.496	45.6639	38.9652	46.4882	42.6711	40.6703	35.8426	44.8762	38.7982	38.0141
YBL018C	POP8	102.37	126.786	119.299	51.6278	55.3351	56.6781	66.8153	76.0304	96.1713	32.462	45.6062	33.1854
YBL019W	APN2	16.1654	15.6698	17.0614	26.9046	31.0837	30.172	15.6617	16.8113	16.0012	27.5728	29.317	31.5933
YBL020W	RFT1	49.1368	55.9115	55.8132	48.936	45.484	49.3161	50.1184	49.6383	51.7895	45.1483	42.4657	40.8277
YBL021C	HAP3	52.4274	45.3639	67.8891	44.3786	36.0903	38.7011	31.0515	44.091	50.8434	25.4469	38.0397	34.658
YBL022C	PIM1	76.0809	69.3458	73.6292	139.463	139.497	141.187	73.8471	71.459	67.2793	149.892	137.443	134.144
YBL023C	MCM2	24.2324	26.7866	26.5278	24.4446	23.7093	26.4204	25.9434	23.5149	24.3619	22.4575	19.6643	22.0365
YBL024W	NCL1	112.942	127.947	113.976	102.744	82.3158	90.9187	126.178	122.55	102.407	45.1425	48.5235	31.008
YBL025W	RRN10	40.7248	29.456	30.7625	34.507	54.9298	36.2217	35.1163	36.4727	42.4846	30.7587	28.5666	36.5158
YBL026W	LSM2	390.463	330.858	297.801	307.018	294.075	268.186	282.797	387.619	357.524	109.772	192.925	178.95
YBL027W	RPL19B	4535.22	4551.58	4901.6	2490.45	2358.45	2210.04	4274.73	4317.58	4678.11	344.069	591.197	348.012
YBL028C	YBL028C	307.387	394.345	384.961	226.675	201.282	154.242	252.489	263.526	277.147	26.5172	84.117	25.3658
YBL029C-A	YBL029C-A	48.5268	57.4507	60.2333	69.9674	94.4746	88.064	37.5912	51.3862	40.0071	121.951	137.955	87.2815
YBL029W	YBL029W	3.8857	3.86499	5.12691	2.93587	2.95755	4.66842	4.92964	3.98332	3.50676	3.04831	2.96295	2.72475
YBL030C	PET9	314.783	322.681	326.333	387.464	418.116	454.865	338.982	353.139	374.625	227.893	227.009	240.252
YBL031W	SHE1	32.7091	36.9005	34.2243	24.286	27.8464	28.0252	29.3361	31.5095	29.9653	15.5905	17.511	17.1236
YBL032W	HEK2	157.406	144.918	151.924	100.232	100.212	103.839	137.389	137.564	138.46	72.3998	70.8294	66.557
YBL033C	RIB1	57.6492	40.4927	55.7789	82.3649	81.6074	75.3306	46.6238	50.5609	53.7814	70.725	91.5641	74.9404
YBL034C	STU1	10.5952	11.18	10.9168	10.8668	11.1505	11.8431	11.5217	10.196	10.1505	13.6081	12.0765	13.6932
YBL035C	POL12	24.5987	28.4508	25.3192	23.2225	19.1165	23.0998	27.5022	26.433	25.3897	14.1459	15.7951	12.5102
YBL036C	YBL036C	177.82	199.946	184.337	236.707	234.395	240.773	159.63	183.898	167.492	171.382	178.226	172.413
YBL037W	APL3	18.0321	20.0103	20.5219	22.9031	24.6647	25.0833	20.6011	20.2022	16.3791	20.8943	20.4402	19.2843
YBL038W	MRPL16	86.4984	75.5841	99.618	100.291	123.856	105.277	66.5737	80.9325	85.4938	66.325	84.8092	86.456
YBL039C	URA7	159.775	199.392	159.711	156.183	81.2819	117.539	199.52	181.33	165.626	25.0907	51.2297	13.5639
YBL039C-A	YBL039C-A	0	0	0	0	0	0	0	0	0	0	0	0
YBL039W-B	YBL039W-B	154.489	20.9911	72.4101	27.9523	86.0938	86.1618	42.7829	0	66.4831	127.573	155.68	0
YBL040C	ERD2	200.296	208.848	197.726	257.827	280.535	239.26	143.012	157.014	178.962	170.868	157.234	176.614
YBL041W	PRE7	361.706	309.632	342.147	549.174	563.87	556.862	305.183	369.722	391.002	558.017	643.892	595.065
YBL042C	FUI1	39.2656	49.719	37.3225	63.635	39.3376	57.7355	39.2547	35.6776	30.7116	37.005	56.3691	17.2748
YBL043W	ECM13	3.14205	1.72832	2.21671	4.33857	8.23126	4.16638	1.25118	2.23177	2.17522	8.04879	8.09034	6.29245
YBL044W	YBL044W	0.976326	2.28978	0	0	0	1.17997	2.21586	1.20548	1.22224	1.44459	1.46213	1.4842
YBL045C	COR1	116.595	126.095	110.013	176.666	179.972	176.532	128.103	124.329	127.927	202.862	175.184	206.762
YBL046W	PSY4	36.0998	38.639	41.2304	32.8845	35.9991	33.7984	35.5449	40.1631	36.5165	28.2519	28.8508	29.9007
YBL047C	EDE1	59.5839	55.704	61.3797	80.9689	83.8459	88.981	60.6707	54.9393	51.1666	109.533	84.2232	96.4092
YBL048W	RRT1	0	0	0	12.8227	5.47451	4.28849	0	0	2.18117	5.37357	19.3475	31.3337
YBL049W	MOH1	2.7286	0.785376	2.51475	30.2194	25.6078	43.5978	2.27892	7.39292	1.70057	58.7849	48.1909	73.8364
YBL050W	SEC17	130.43	125.302	130.256	166.474	193.297	179.186	101.179	117.117	119.119	209.995	197.851	207.604
YBL051C	PIN4	92.6915	90.4318	96.4664	90.5962	96.2898	105.047	86.0942	84.0462	75.7786	65.9902	55.6342	56.5758
YBL052C	SAS3	38.0018	36.6366	35.3729	27.9124	29.0028	32.2466	35.8097	34.9886	32.2068	25.6591	23.3209	22.9341
YBL053W	YBL053W	0.928532	4.34435	2.31031	0	0.950593	1.11907	0	1.14229	3.48506	1.36561	0	2.80222
YBL054W	TOD6	44.4487	47.2784	42.0263	73.0179	26.6975	48.2731	46.989	48.7558	40.7362	8.72298	17.6267	4.10082
YBL055C	YBL055C	37.9942	44.9851	41.8661	64.9759	48.4994	52.8895	42.7827	40.96	40.5623	35.7088	46.5993	27.6395
YBL056W	PTC3	207.939	200.318	191.173	197.798	203.217	201.191	184.608	190.033	181.319	189.208	175.77	192.52
YBL057C	PTH2	167.616	146.041	157.475	157.691	167.388	145.915	127.302	151.471	164.235	153	173.452	150.222
YBL058W	SHP1	192.208	178.411	189.901	299.613	313.089	302.061	172.746	182.909	178.145	313.971	300.824	297.682
YBL059C-A	CMC2	134.435	118.185	140.028	225.474	235.402	212.485	103.231	115.001	169.116	165.028	164.488	188.41
YBL059W	YBL059W	28.4756	26.0238	32.246	30.4751	34.9452	33.0743	19.9826	21.4357	25.6995	20.8247	22.6646	25.4189
YBL060W	YEL1	18.6242	18.0037	20.1192	31.3034	30.004	32.6544	19.3488	17.3661	19.9365	25.3197	23.4117	24.5043
YBL061C	SKT5	39.1959	45.415	42.3553	74.344	61.5183	68.7183	42.7565	42.7946	38.8831	53.5281	46.7978	46.0087
YBL062W	YBL062W	0.884546	0	0	0	0.904079	0	0	0	0	0	0	0
YBL063W	KIP1	13.7354	14.9115	15.7928	14.9879	14.0942	15.6037	15.0992	15.7585	14.6838	15.6782	14.7648	14.0767
YBL064C	PRX1	120.993	102.999	120.937	595.674	639.818	685.684	93.206	128.274	131.31	764.369	816.89	900.252
YBL065W	YBL065W	0	0	0	0	0	0	1.39525	0	0	0	1.87554	0
YBL066C	SEF1	10.5913	10.3578	10.9775	14.3045	12.4999	13.4756	11.4881	11.4947	11.0413	15.0515	13.1307	13.3908
YBL067C	UBP13	40.836	38.1273	42.7585	50.2697	44.0596	48.4325	41.8999	38.0615	37.2209	42.6135	39.7789	34.7903
YBL068W	PRS4	66.539	78.7286	65.2288	78.4605	71.2298	71.8666	69.0988	70.84	70.7955	29.6616	33.289	27.0139
YBL068W-A	YBL068W-A	6.43913	7.85634e-05	23.8807	6.05169	3.64084e-05	0.000196976	0.000118961	2.42348e-05	9.38465e-05	0.000154386	2.41206e-05	2.09903e-05
YBL069W	AST1	43.8115	48.4713	45.3217	59.6507	53.9589	58.0407	43.2959	50.4343	44.0821	27.8894	32.5048	26.717
YBL070C	YBL070C	0	0	0	2.29738	0	0	0	1.99641	0	2.41066	0	5.07317
YBL071C	YBL071C	1.79106	0	0	0	0	2.22394	2.10076	2.31629	0	0	0	0
YBL071C-B	YBL071C-B	0	0	0	0	0	0	0	0	0	0	0	0
YBL071W-A	KTI11	140.45	197.299	111.167	284.225	205.591	213.356	95.7514	79.4151	126.807	103.476	66.9514	36.9383
YBL072C	RPS8A	4606.78	4945.44	4647.46	2212.63	2152.18	2057.72	4321.47	4438.04	4698.99	327.297	560.766	342.205
YBL073W	YBL073W	0	0	0	0	0	0	0	0	0	0	0	0
YBL074C	AAR2	15.0533	15.6289	14.7226	28.2468	27.2723	30.8249	18.0623	12.2226	14.8459	23.6987	19.1793	18.3125
YBL075C	SSA3	25.2312	24.8699	23.2449	208.381	275.951	218.619	29.1536	30.2143	30.5171	481.203	464.026	546.645
YBL076C	ILS1	244.298	277.035	249.12	217.35	171.588	194.658	291.246	270.313	238.081	111.225	121.337	82.4837
YBL077W	YBL077W	0	0	0.760096	0.853621	0	0	1.37585	0	0.772825	0	0	0
YBL078C	ATG8	72.5032	46.0817	55.9583	144.15	216.205	222.662	36.9734	41.7269	64.3423	329.997	313.299	330.301
YBL079W	NUP170	30.177	34.5249	32.709	37.9292	30.4855	34.5499	37.165	34.7736	29.5462	24.0522	24.0791	21.8604
YBL080C	PET112	21.8496	20.7485	23.6239	25.9587	29.1253	26.6841	13.7123	14.8862	14.8975	20.5387	22.5339	22.5457
YBL081W	YBL081W	85.7231	74.0439	83.6608	95.3498	77.6066	77.1493	92.4472	88.1557	78.5222	42.3828	57.4331	29.0928
YBL082C	ALG3	50.8211	44.2903	54.7034	34.8292	26.3072	28.2616	47.7376	44.9892	47.8893	10.0709	15.7936	8.8254
YBL083C	YBL083C	32.3424	42.0728	29.774	27.7747	14.9219	24.6673	40.1341	34.3952	38.4038	7.84123	13.2141	2.96432
YBL084C	CDC27	18.9506	20.6249	19.7738	25.4004	26.3188	29.2603	20.4622	19.1228	19.4832	31.8173	25.8871	31.0774
YBL085W	BOI1	46.7131	50.2833	51.569	42.6959	47.6505	46.5078	50.9714	47.2277	45.0853	39.0651	33.5981	40.1791
YBL086C	YBL086C	36.5565	32.9679	37.2842	35.9405	44.8159	46.8447	28.8696	33.1727	31.198	34.0484	33.7653	43.8211
YBL087C	RPL23A	2874.25	2887.94	2927.97	1333.21	1388.88	1193.83	2703.35	2705.59	2945.07	180.359	272.229	189.805
YBL088C	TEL1	7.4826	7.67494	7.73134	11.5058	9.88349	10.7216	7.07959	7.67308	7.22614	7.55988	7.7014	6.98084
YBL089W	AVT5	25.6608	23.2994	21.8924	31.9339	32.6477	36.9908	20.0497	20.8223	21.1596	36.7364	33.9101	30.8307
YBL090W	MRP21	103.978	102.942	112.511	143.777	143.257	134.269	82.8709	98.5046	116.036	88.5927	96.0411	86.2489
YBL091C	MAP2	271.039	263.399	261.867	260.224	258.02	256.898	208.421	219.965	229.167	192.059	198.297	210.419
YBL091C-A	SCS22	51.2812	47.9461	63.252	97.5582	109.897	112.901	24.8647	34.4076	35.5986	74.5844	104.662	112.068
YBL092W	RPL32	8596.34	9002.69	8748.71	3881.68	3848.48	3594.79	7962.38	7975.46	8491.79	623.365	1041.76	563.86
YBL093C	ROX3	105.312	108.837	114.225	150.402	133.48	147.125	85.3916	94.0887	89.4811	100.61	145.281	99.4981
YBL094C	YBL094C	1.3712	1.6338	0	0	1.42767	0	1.58502	1.73691	0	0	2.14669	2.18992
YBL095W	YBL095W	28.7701	32.0044	31.5529	50.3012	49.4056	44.6433	31.4661	31.6022	34.4957	37.383	46.7661	49.7587
YBL096C	YBL096C	0	2.15601	0	0	1.89484	0	0	2.31629	0	0	0	0
YBL097W	BRN1	7.95329	9.57695	9.13952	9.49714	8.77721	8.86366	11.2289	10.9468	7.99674	7.65252	8.4366	5.87776
YBL098W	BNA4	23.1204	23.8117	20.793	26.9337	23.739	26.1137	18.9765	28.2802	27.0539	11.4681	12.9901	12.4301
YBL099W	ATP1	262.752	255.261	259.12	302.779	292.504	312.085	278.415	260.275	275.452	319.995	301.296	337.331
YBL100C	YBL100C	0	0	0	0	0	0	0	0	0	0	0	0
YBL100W-A	YBL100W-A	4.05455e-07	3.70918e-07	3.44761e-07	4.36371e-07	4.94279e-07	3.73477e-07	2.53786e-07	2.30433e-07	1.56259e-07	9.9653e-08	3.99473e-07	1.57484e-07
YBL100W-B	YBL100W-B	13.312	13.7957	13.7807	18.0365	19.1773	20.0593	12.1161	11.1996	9.76847	14.3302	10.0064	13.0941
YBL100W-C	YBL100W-C	0	0	0	0	759.438	0	0	0	0	0	0	0
YBL101C	ECM21	14.7811	15.1671	16.3885	33.3836	36.5877	38.4857	15.6553	15.2425	12.6177	40.1847	34.5931	39.5642
YBL102W	SFT2	200.723	180.671	211.481	259.923	263.374	248.171	172.545	164.983	173.28	285.998	277.128	302.65
YBL103C	RTG3	32.231	34.4206	36.9358	28.9859	33.6048	33.7067	28.8621	32.6736	29.2084	32.6287	34.6989	29.1392
YBL104C	YBL104C	17.4236	18.8173	19.9571	21.9542	21.2551	23.6426	18.3821	18.9293	17.7945	24.7987	23.8839	20.5808
YBL105C	PKC1	30.9316	34.2232	32.3349	34.3929	34.605	36.8938	36.4462	34.0275	31.6022	37.7212	33.5424	35.7201
YBL106C	SRO77	11.1907	11.4594	10.3458	9.08664	6.32851	8.97314	7.90282	8.19767	7.43472	6.2961	5.08264	6.27262
YBL107C	YBL107C	107.224	93.7559	103.964	158.086	161.579	149.154	87.928	110.799	120.56	123.838	127.756	120.696
YBL107W-A	YBL107W-A	0	0	0	0	4474.61	0	0	0	0	0	0	0
YBL108C-A	PAU9	27.536	0	48.6412	0	0	0	0	91.9356	0	0	0	0
YBL108W	YBL108W	0	0	0	0	0	0	0	0	0	0	0	0
YBL109W	YBL109W	1.32935	0	0	0	0	0	3.06809	0	1.67085	2.0297	2.07409	2.11384
YBL111C	YBL111C	9.88581	9.71222	11.7474	10.2864	9.76344	11.0603	10.7756	12.3831	13.3427	12.4565	11.7664	14.0961
YBL112C	YBL112C	26.6155	35.7538	27.7961	31.6151	35.4762	32.1299	47.1359	50.5002	39.4589	71.0676	66.9911	61.9673
YBL113C	YBL113C	22.3591	20.901	29.2144	20.561	24.0963	25.5912	33.1595	32.9687	26.6887	37.0413	31.0198	35.5393
YBL113W-A	YBL113W-A	0.163725	0.0281089	0.2822	0.234492	0.118888	0.0683671	0.399384	0.0694886	0.208176	0	0.0330877	0.110461
YBR001C	NTH2	18.6129	19.3999	20.1383	41.2932	56.3022	55.3213	21.0629	21.0093	19.4962	37.5851	33.1605	48.2855
YBR002C	RER2	79.2162	81.571	82.021	79.5918	64.1518	81.2203	67.3898	73.9779	77.2621	45.4767	52.1267	43.5787
YBR003W	COQ1	59.1991	50.994	57.5293	68.8022	81.7956	78.9691	47.9104	51.1755	51.1099	74.7083	79.1902	82.6026
YBR004C	GPI18	43.3247	40.5374	46.0754	56.718	50.9574	53.5777	39.9847	37.858	39.3598	30.7686	38.3005	29.8449
YBR005W	RCR1	29.1459	23.4098	33.229	58.8051	66.3334	59.1048	31.4867	29.4476	25.7302	54.9584	61.4362	52.726
YBR006W	UGA2	27.1868	22.0582	26.7217	80.5751	85.2761	89.095	17.062	22.981	21.0403	91.2713	86.5754	95.0252
YBR007C	DSF2	20.3375	22.2349	22.9409	22.2906	22.6068	24.5771	20.8218	23.4092	20.1492	27.2421	23.5535	25.7336
YBR008C	FLR1	26.929	26.5411	29.2528	32.378	31.4394	36.631	30.3572	27.7984	30.7341	33.3546	38.2778	35.413
YBR009C	HHF1	2695.36	2600.4	2809.37	544.963	635.955	603.605	2234.48	2282.18	2874.78	824.842	854.052	905.829
YBR010W	HHT1	1960.74	2015.12	2012.49	501.66	521.984	542.389	1632.25	1788.81	2084.86	701.779	811.843	793.302
YBR011C	IPP1	1654.46	1637.89	1662.18	1373.74	1282	1288.11	1531.95	1479.93	1460.74	1058.88	1038.6	1043.59
YBR012C	YBR012C	10.704	17.6978	12.3223	14.7979	16.2825	20.5628	17.1178	19.3096	13.3391	5.65572	11.3058	4.81452
YBR012W-A	YBR012W-A	2.08187e-06	1.2954e-06	1.28616e-06	9.84101e-07	9.08983e-07	1.69421e-06	9.27266e-07	1.03991e-06	2.47927e-06	8.05183e-07	1.55604e-06	9.60915e-07
YBR012W-B	YBR012W-B	23.1977	24.6421	25.2004	49.6797	42.2971	46.1307	23.7447	25.8505	22.4609	31.1628	33.8799	25.7224
YBR013C	YBR013C	28.0462	28.7708	28.5933	91.471	83.2841	98.7394	23.1927	20.1253	32.9773	121.91	86.6119	108.868
YBR014C	GRX7	138.964	128.812	121.544	198.82	218.733	198.773	92.7179	102.254	103.588	112.057	111.281	133.614
YBR015C	MNN2	92.9674	96.2288	101.682	93.7904	86.4062	94.8826	105.135	88.1834	85.8501	77.3487	71.9632	67.598
YBR016W	YBR016W	281.048	263.28	298.054	283.617	284.24	273.134	215.726	233.572	259.454	260.016	280.434	254.919
YBR017C	KAP104	53.5421	59.566	58.9357	75.0009	70.8842	74.6564	60.4359	50.9192	50.6634	46.7676	45.2896	40.533
YBR018C	GAL7	3.67183	3.6196	5.73494	6.39357	12.0267	10.729	2.24408	2.3984	2.61715	8.33912	8.38665	12.0518
YBR019C	GAL10	0.642455	0.464376	0.251614	1.2954	1.22322	1.0551	0.503481	0.29861	0.26231	1.2119	0.432854	0.595385
YBR020W	GAL1	9.08943	7.85216	7.10212	9.99167	9.10943	9.81666	9.05178	7.33348	6.84914	8.30458	8.23143	11.3834
YBR021W	FUR4	19.6401	21.1453	18.8513	27.79	18.9173	23.6285	25.7499	21.726	23.7676	10.1799	12.8611	6.61594
YBR022W	POA1	44.2096	49.344	54.1972	95.6824	113.539	105.807	39.8932	56.0991	64.36	77.6431	119.071	111.256
YBR023C	CHS3	46.406	49.4589	44.8833	63.9234	52.4256	59.2957	50.7013	47.6855	43.9474	41.7797	39.8911	37.3354
YBR024W	SCO2	31.3436	33.0618	39.327	61.5431	69.2819	76.4046	25.092	29.9042	31.6574	71.0132	69.3357	64.1442
YBR025C	OLA1	696.849	772.401	688.925	615.584	658.895	600.56	954.043	897.201	902.777	1039.2	1032.17	971.668
YBR026C	ETR1	86.893	90.7222	92.5907	263.403	293.661	293.082	79.6642	79.8132	86.0346	302.791	285.995	295.449
YBR027C	YBR027C	0	1.6338	1.73678	0	1.42767	0	0	1.73691	0	2.09891	2.14669	2.18992
YBR028C	YBR028C	48.1622	50.7427	49.8842	45.0373	40.1208	46.0489	43.0209	43.8467	45.8856	21.2229	24.6076	21.8089
YBR029C	CDS1	99.1122	91.5338	87.8424	120.131	125.29	123.431	87.0818	88.6356	86.303	106.223	106.254	94.396
YBR030W	RKM3	32.2743	34.0559	35.3121	35.8804	27.2349	30.0709	32.2357	33.7922	30.4234	26.4642	28.9557	23.7506
YBR031W	RPL4A	2644.57	2815.6	2694.18	1772.14	1527.68	1506.7	2902.95	2640.72	2567.67	380.635	558.055	328.541
YBR032W	YBR032W	7.7018	13.9395	9.93225	0	2.04709	2.39615	4.53441	2.50411	7.29931	0	3.09941	0
YBR033W	EDS1	0.943371	0.766014	1.0149	3.447	5.46404	5.24022	0.369064	1.18171	0.818103	5.92334	6.05533	6.7271
YBR034C	HMT1	222.451	217.65	207.001	237.794	171.207	223.094	226.349	211.617	206.375	134.183	202.796	80.2589
YBR035C	PDX3	190.201	180.293	185.738	295.665	342.206	316.426	163.183	173.824	167.524	345.917	358.475	372.312
YBR036C	CSG2	140.478	132.594	144.731	160.031	157.949	163.495	131.393	137.179	133.645	152.262	134.2	154.4
YBR037C	SCO1	46.8031	41.6674	53.464	67.7342	81.2056	83.9405	31.081	48.4185	42.9037	42.9801	45.1108	46.4406
YBR038W	CHS2	46.0441	48.2175	47.1688	25.9396	27.7182	30.8859	55.9014	46.9899	43.6354	29.7878	22.555	26.3182
YBR039W	ATP3	185.573	177.854	185.3	198.22	221.729	209.284	183.077	202.877	219.198	229.668	233.369	239.202
YBR040W	FIG1	1.57419	3.36357	1.67825	1.01721	0.627614	0	0	1.24593	1.74141	0	0.376449	0
YBR041W	FAT1	53.5024	51.0007	50.5982	52.5194	60.2026	58.2301	42.8249	45.4378	47.0509	48.6166	38.4782	46.9709
YBR042C	CST26	63.9666	62.0701	63.9161	61.1773	62.6987	66.2013	58.3991	55.4685	55.9617	51.3055	54.7932	46.3176
YBR043C	QDR3	31.7349	30.3381	35.9458	41.8397	38.2579	40.5909	29.9495	29.9391	29.9379	37.0396	37.9851	31.3506
YBR044C	TCM62	28.9084	32.561	30.5865	40.5064	38.2619	40.158	25.0233	27.1733	28.887	30.0144	30.8784	29.9421
YBR045C	GIP1	3.64732	3.52011	3.81339	6.80852	10.3374	8.26128	3.46367	3.32118	4.22131	6.38261	6.11299	8.54293
YBR046C	ZTA1	47.3251	40.5214	48.9816	118.807	128.051	136.69	33.0783	36.7228	36.9654	124.735	110.454	130.194
YBR047W	FMP23	28.7485	19.6143	37.4826	38.9195	63.2072	59.2338	10.9573	19.0147	14.4319	27.586	36.7324	32.9921
YBR048W	RPS11B	2973.87	3256.97	3188.29	1405.79	1309.34	1285.17	3092.97	3008.65	2887.88	226.706	363.882	195.722
YBR049C	REB1	54.9337	55.857	52.303	58.5892	53.6562	57.9732	65.358	58.9438	56.3206	70.2163	60.2265	57.7459
YBR050C	REG2	3.69296	4.61257	4.36574	4.2458	8.0124	5.54666	6.11748	6.24245	6.15504	6.42908	7.42652	8.22928
YBR051W	YBR051W	0	0	1.44057	0	1.18414	1.39826	1.31318	0	1.43902	0	1.7577	0
YBR052C	RFS1	237.553	181.2	209.766	535.585	637.047	550.542	154.634	175.489	191.301	566.712	541.962	617.464
YBR053C	YBR053C	96.5017	79.2526	104.842	301.747	344.462	312.678	76.2426	84.4429	88.5183	377.727	366.41	408.018
YBR054W	YRO2	59.1006	34.4653	49.1539	208.814	249.642	245.775	129.33	125.823	144.989	836.09	741.407	928.342
YBR055C	PRP6	28.6596	31.1843	31.4398	34.9188	31.2773	36.5383	31.1001	27.5867	28.5052	25.5059	25.1532	21.1325
YBR056C-B	YBR056C-B	0	0	0	0	0	0	0	0	0	0	0	0
YBR056W	YBR056W	67.9783	58.5306	70.1214	189.502	212.623	207.8	42.2764	52.9748	56.9049	200.307	183.997	227.369
YBR056W-A	YBR056W-A	51.1865	12.5539	14.2635	49.5578	24.8802	12.8877	38.214	29.3718	26.4134	46.5961	47.7589	56.6625
YBR057C	MUM2	61.2367	62.3087	62.7346	54.0409	58.7188	62.935	55.1046	54.6303	58.886	36.5196	48.2233	48.207
YBR058C	UBP14	38.7285	39.2543	41.2152	58.0983	52.7769	59.2913	45.1676	44.5336	41.4776	50.7131	47.6287	44.8102
YBR058C-A	TSC3	469.787	447.242	558.187	408.428	736.266	517.344	268.007	431.649	274.567	384.672	420.106	451.195
YBR059C	AKL1	33.4079	34.031	33.6309	55.0304	60.2281	57.8488	34.9077	33.0698	32.5485	75.1763	66.6854	75.9674
YBR060C	ORC2	33.846	36.7263	34.3656	39.7377	38.9198	44.0447	33.66	33.5341	30.8751	34.0963	37.0569	31.6962
YBR061C	TRM7	72.9022	73.9479	74.234	65.6137	49.3677	60.7347	74.1683	68.0529	74.6815	34.2547	50.552	26.181
YBR062C	YBR062C	99.3783	87.0335	86.1019	214.384	278.408	227.484	71.6386	89.4944	101.198	237.836	283.105	289.518
YBR063C	YBR063C	31.3193	35.2088	36.0235	51.1796	46.1748	57.4711	27.9915	28.1564	31.5333	53.9585	52.6686	50.2667
YBR064W	YBR064W	0	0	0.774648	0	0	0	0	0	0	0	0	0
YBR065C	ECM2	20.5222	21.6183	21.5596	36.6539	33.2577	38.7544	19.5305	20.5383	18.6015	38.5352	36.4785	28.1834
YBR066C	NRG2	51.7076	52.3203	75.4458	54.3303	73.5659	74.5585	34.3188	35.3194	46.4553	28.7456	28.4314	33.8787
YBR067C	TIP1	424.387	407.701	508.682	517.75	624.156	570.967	694.751	656.315	703.128	1568.04	1932.19	1768.17
YBR068C	BAP2	212.199	210.304	212.382	185.518	206.059	216.412	206.906	187.196	185.807	131.303	158.869	139.913
YBR069C	TAT1	181.234	190.505	176.214	133.275	94.0688	127.825	195.704	187.372	178.464	83.0492	113.171	70.3086
YBR070C	ALG14	72.139	66.7704	73.1341	55.3618	61.1256	68.5905	62.3272	65.9732	59.702	69.9083	63.9178	73.2243
YBR071W	YBR071W	105.754	85.3009	82.8654	67.8625	74.2511	91.1149	67.2609	71.4606	84.8651	85.3093	81.8357	71.6196
YBR072C-A	YBR072C-A	0	0	0	0	0	0	0	0	0	0	0	0
YBR072W	HSP26	43.23	34.6738	67.1724	5643.99	6826.48	5017.68	100.479	168.504	196.297	17389.2	18445.9	23107.5
YBR073W	RDH54	47.1857	49.1266	46.2964	48.102	43.6437	45.0493	43.7938	48.2861	41.3369	36.1274	33.4478	32.2924
YBR074W	YBR074W	30.3022	35.3859	34.564	46.3941	43.5579	47.8239	35.2667	31.4781	31.8286	29.3455	28.1335	28.7786
YBR076C-A	YBR076C-A	25.0128	26.7078	16.5772	28.9083	20.717	7.85809	26.3997	29.5044	43.8033	24.5741	15.2721	16.4446
YBR076W	ECM8	0.656795	0.143553	0.621133	0.676534	1.439	1.30828	0.276928	1.18416	0.161318	2.7209	4.2036	2.97998
YBR077C	SLM4	80.3349	77.7891	79.011	98.7375	94.2759	95.8306	58.6802	62.5967	68.3419	107.726	113.816	116.537
YBR078W	ECM33	1183.94	1222.52	1185.29	794.343	719.992	757.758	1192.8	1084.81	1107.97	602.681	610.171	554.639
YBR079C	RPG1	193.447	214.358	195.348	163.226	136.921	149.833	229.648	209.053	186.573	72.1728	76.4096	56.0623
YBR080C	SEC18	64.489	65.4181	66.5144	79.8033	81.0648	84.4437	61.9727	65.2841	53.8179	84.3721	73.5251	79.3798
YBR081C	SPT7	22.3283	22.6678	24.1032	28.2092	25.4792	28.9322	24.0112	23.2897	19.607	27.5584	26.9113	23.2664
YBR082C	UBC4	1101.04	1098.2	1184.42	1567.39	1943.66	1710.91	1533.21	1740.74	1616.65	2950.91	3283.15	3199.97
YBR083W	TEC1	49.1708	62.0287	58.34	86.8524	111.101	102.479	48.9101	54.179	63.6722	48.2251	42.6768	43.9652
YBR084C-A	RPL19A	3456.6	3609	3642.22	2111.23	1890.9	1922.51	3244.64	3372.91	3345.36	332.866	509.733	308.632
YBR084W	MIS1	67.1711	90.6973	77.4792	61.9759	43.2417	47.7375	93.8633	81.2435	73.5547	14.755	22.1181	9.55853
YBR085C-A	YBR085C-A	281.176	225.542	239.168	1215.04	1520.73	1512.28	295.503	409.369	443.454	2347.31	2105.17	2887.26
YBR085W	AAC3	17.8254	19.3262	20.8959	22.5932	20.2937	22.4294	9.88028	11.9291	11.4932	7.76382	7.55868	7.4519
YBR086C	IST2	74.9698	78.0456	74.7556	85.1874	71.7338	90.2335	94.3816	77.0637	71.6731	99.8517	83.8786	93.5652
YBR087W	RFC5	71.28	81.5567	72.7987	56.8718	66.8382	64.627	74.4196	76.1289	71.8519	49.3913	46.125	39.729
YBR088C	POL30	291.238	288.188	282.938	114.897	100.906	118.882	221.966	222.469	235.587	49.1979	56.5063	59.2763
YBR089C-A	NHP6B	361.865	295.012	424.73	593.722	512.904	446.23	275.8	318.202	458.194	687.075	821.452	841.901
YBR089W	YBR089W	0.906429	1.00811	0.724031	0	0.605154	1.36955	0.324709	0.348199	0.746323	0	0	0.398195
YBR090C	YBR090C	39.9298	40.958	29.8354	58.5696	53.2607	64.5856	30.4773	30.0168	31.9474	104.359	111.279	102.78
YBR091C	TIM12	95.5194	62.4691	73.6043	59.9885	60.5108	70.538	52.435	62.8912	87.228	47.7713	60.0161	45.3999
YBR092C	PHO3	192.471	237.881	204.335	149.247	136.156	143.315	211.808	189.736	188.759	48.5377	55.5653	30.8611
YBR093C	PHO5	14.2026	17.1463	18.0566	16.2875	14.1237	15.7157	21.6167	11.1572	12.1061	20.7275	14.2579	18.7756
YBR094W	PBY1	27.1902	31.4388	28.9905	31.2881	32.5248	36.2618	28.6029	29.2175	28.0008	29.5454	27.1066	26.8849
YBR095C	RXT2	37.1763	43.0966	38.2764	43.4435	45.0078	49.7212	32.9802	36.0964	33.9358	34.5822	39.607	35.335
YBR096W	YBR096W	186.05	186.31	183.988	346.748	352.119	341.211	128.363	163.87	147.163	252.301	229.014	249.975
YBR097W	VPS15	7.04302	7.66496	8.116	12.989	12.0365	13.0691	8.18037	7.4021	6.39802	13.0308	13.136	11.625
YBR098W	MMS4	11.0132	11.2357	11.4424	13.6809	13.9047	15.9204	4.1386	4.963	4.51887	6.72343	6.83166	6.63779
YBR099C	YBR099C	14.6856	5.03361	13.9289	3.6502	6.17582	6.22097	83.7562	100.438	84.2265	186.348	142.155	161.215
YBR101C	FES1	194.872	192.301	183.209	115.162	195.417	141.56	162.161	160.201	180.387	1819.65	1780.13	1902.82
YBR102C	EXO84	24.9776	24.2452	24.717	34.9801	31.8411	38.0372	21.0028	20.8853	19.992	31.2421	27.0499	26.0352
YBR103C-A	YBR103C-A	0	0	0	0	0	0	0	0	0	0	0	0
YBR103W	SIF2	37.544	30.5111	32.8762	37.129	41.7655	41.2975	32.2139	34.3612	31.547	37.6032	35.0363	38.5187
YBR104W	YMC2	65.8422	79.0297	65.4024	50.2707	37.9044	42.7502	58.6183	59.8912	64.5645	18.2092	26.6568	12.4391
YBR105C	VID24	43.7516	39.8863	48.4095	261.518	262.052	305.325	52.3869	56.397	49.2833	303.705	360.351	208.152
YBR106W	PHO88	1270.32	1210.75	1208.37	1104.02	1111.84	1033.72	1176.02	1191.07	1150.44	770.902	910.073	665.585
YBR107C	IML3	20.3245	21.2284	25.4384	22.6112	28.9607	28.6665	21.5448	21.4572	21.1166	27.2079	37.3944	32.1484
YBR108W	AIM3	14.2959	13.6646	17.3117	26.2823	27.7464	28.2886	15.6655	13.9682	12.9401	34.0488	29.8416	34.7004
YBR109C	CMD1	632.255	637.4	670.541	786.94	828.59	783.468	454.237	534.858	572.091	569.042	673.544	593.598
YBR109W-A	YBR109W-A	31.3746	23.1023	0	39.9347	14.7035	23.7332	54.2434	26.4643	0	9.70267	40.0345	0
YBR110W	ALG1	76.0422	70.6827	72.2428	76.7389	74.5446	88.3882	63.4704	65.3557	61.1316	71.4732	69.7204	62.0637
YBR111C	YSA1	248.309	244.491	246.767	418.131	539.148	509.188	184.299	210.142	241.971	451.891	466.202	467.516
YBR111W-A	SUS1	143.423	181.957	171.969	162.423	301.125	187.592	71.8179	100.252	93.6757	179.259	170.705	220.799
YBR112C	CYC8	44.5224	47.6288	50.7383	45.352	45.3859	50.5066	56.3296	48.2978	45.4891	40.3145	35.8516	33.871
YBR113W	YBR113W	0	0	0	0	0	0	0	0	0	0	0.628666	0
YBR114W	RAD16	10.9194	11.301	12.6859	43.1865	41.4364	49.0491	10.5015	11.9881	10.5492	42.6874	52.6669	36.2425
YBR115C	LYS2	31.391	35.0995	34.1904	41.3702	33.4134	38.4639	34.1553	32.7618	27.9761	28.6428	28.3073	24.4777
YBR116C	YBR116C	0.4465	0.526662	1.04749	20.688	27.4066	42.1711	1.67944	1.7601	4.01223	63.777	43.6523	74.7362
YBR117C	TKL2	2.14348	1.30377	2.18901	48.6406	54.1387	79.8936	2.68208	4.19286	2.3424	101.448	91.4447	128.647
YBR118W	TEF2	10391	10213.7	10519.3	8010.67	7429.29	7394.35	11406	11292.8	11190.6	5685.48	7045.47	6245.86
YBR119W	MUD1	49.2721	49.8498	53.1445	56.5568	63.7028	60.4918	36.724	40.2257	49.9204	35.9492	36.7038	43.9414
YBR120C	CBP6	52.3325	45.1177	45.0697	62.5234	82.2603	76.983	26.8324	31.838	38.1576	32.0101	40.7791	40.3155
YBR121C	GRS1	432.031	475.995	442.826	289.34	254.843	274.342	473.785	457.356	413.475	142.49	158.181	121.597
YBR121C-A	YBR121C-A	8.33097e-06	6.34105e-06	1.86584e-05	7.54967e-06	2.68432e-05	1.7445e-06	1.1165e-05	4.6102e-06	3.34923e-06	0.000101694	1.62267e-05	0.000119506
YBR122C	MRPL36	166.213	158.879	160.534	206.806	217.171	211.614	136.13	146.653	136.706	138.364	144.552	139.325
YBR123C	TFC1	26.1355	32.179	32.6389	29.3651	31.8784	30.6149	29.5196	27.8701	28.3016	25.6818	27.3995	28.7246
YBR124W	YBR124W	0	0	0	0	1.08642	2.56369	0	0	0	0	0	0
YBR125C	PTC4	45.7263	43.5024	43.2654	57.157	62.3167	64.1182	49.5458	45.4318	48.4354	57.6842	54.785	45.3949
YBR126C	TPS1	194.877	158.07	207.343	579.439	729.63	641.993	162.139	183.866	190.896	812.575	678.187	966.838
YBR126W-A	YBR126W-A	1173.34	936.175	747.962	1276.06	1397.58	1175.33	593.01	637.111	965.648	831.949	960.429	1037.19
YBR126W-B	YBR126W-B	986.013	1906.98	1707.57	1652.87	1651.73	1587.49	884.225	563.42	667.131	629.408	666.789	1250.08
YBR127C	VMA2	502.138	451.339	506.474	471.329	444.908	480.44	466.106	449.226	458.274	413.394	404.465	396.804
YBR128C	ATG14	10.172	9.56589	10.0438	16.904	28.0799	24.3567	6.91989	8.99255	11.0678	17.7147	16.7722	21.7308
YBR129C	OPY1	48.6624	58.1734	50.8871	42.5156	59.9734	45.0151	44.1523	54.1029	51.3305	40.9411	40.815	43.3802
YBR130C	SHE3	77.3192	85.7987	81.6172	73.0268	78.2745	76.5736	76.6349	73.0695	75.5897	56.2311	48.4465	53.2377
YBR131C-A	YBR131C-A	0	0	0	0	0	0	0	0	0	0	0	0
YBR131W	CCZ1	13.9656	15.7456	13.9749	19.136	19.8335	20.1147	16.2011	17.2956	14.4392	16.1935	18.2129	16.7297
YBR132C	AGP2	17.341	13.4345	15.4645	34.8614	42.9846	42.4821	15.3769	14.6186	13.4284	33.8217	27.648	42.8131
YBR133C	HSL7	44.9303	45.3633	44.2626	40.8041	40.0081	41.5382	43.5988	42.6693	36.6601	36.0995	31.8261	33.9634
YBR134W	YBR134W	0.755496	0	0.932024	0	0	0	0	0	0	1.08207	0	0
YBR135W	CKS1	140.651	119.691	142.882	111.81	122.78	120.211	121.828	101.944	138.845	96.6428	106.519	95.67
YBR136W	MEC1	4.08689	4.84566	4.28498	6.56949	5.44405	6.34933	5.21808	4.77389	4.00303	6.91965	6.30625	7.1162
YBR137W	YBR137W	90.1218	87.6429	115.918	210.025	217.022	230.334	68.2674	87.5397	104.654	222.227	223.938	249.327
YBR138C	YBR138C	18.3469	18.3835	19.6461	11.0455	15.3978	13.624	16.6184	16.6544	19.5397	17.5773	12.4204	15.9748
YBR139W	YBR139W	60.1214	53.8478	65.1677	139.238	159.414	157.739	51.4591	50.7652	46.9969	236.586	187.159	224.348
YBR140C	IRA1	13.4983	14.9233	14.169	19.1457	15.4769	18.1688	13.9698	13.8443	12.5054	19.6527	18.2241	19.0334
YBR141C	YBR141C	17.4805	19.6843	17.6913	28.9912	17.5411	22.7183	18.3585	17.3125	19.0285	7.90892	13.3461	5.00843
YBR141W-A	YBR141W-A	0	0	0	0	0	0	0	0	0	0	0	0
YBR142W	MAK5	47.6783	56.8091	45.7643	47.7929	30.6211	42.2918	57.3125	52.0285	45.4428	14.9294	24.7584	9.36291
YBR143C	SUP45	423.057	472.517	426.429	333.726	301.727	319.149	427.871	418.157	437.859	131.935	147.352	114.675
YBR144C	YBR144C	0	0	0	0	0	0	0	0	0	0	2.66259	0
YBR145W	ADH5	31.1551	31.4719	33.7523	26.1914	34.2434	27.8447	21.9078	23.4172	25.3822	13.2576	13.6336	17.973
YBR146W	MRPS9	122.523	116.312	133.028	152.177	152.605	142.699	107.441	108.919	108.886	89.5684	93.7916	88.1743
YBR147W	RTC2	3.17914	2.70016	3.57802	9.24636	14.4185	15.8037	2.3531	3.5953	2.34469	18.7442	13.1212	28.0454
YBR148W	YSW1	3.64506	3.54656	3.69467	2.80481	3.87181	4.54709	7.60355	8.21218	9.31732	3.1906	5.60629	5.75997
YBR149W	ARA1	237.712	207.777	220.888	622.492	635.345	641.346	168.791	181.882	173.844	755.695	671.04	732.44
YBR150C	TBS1	12.4595	11.8653	15.3001	14.1308	15.7184	14.5588	11.8046	13.4639	11.1004	14.8706	12.338	16.6304
YBR151W	APD1	141.911	136.677	138.631	178.493	206.96	184.733	122.908	112.787	128.542	160.217	155.597	163.905
YBR152W	SPP381	18.9008	18.7571	22.1414	22.3384	22.5782	23.724	18.4431	19.9112	19.6304	21.4403	24.789	20.4961
YBR153W	RIB7	43.4724	43.9151	42.0881	47.7486	52.7711	46.9867	30.4935	41.0189	32.0151	37.2393	41.553	36.2113
YBR154C	RPB5	257.546	294.319	262.387	267.517	266.005	256.918	236.159	240.386	257.162	106.332	140.277	95.5647
YBR155W	CNS1	83.4195	86.8043	79.7562	82.9167	62.6239	78.8497	76.7764	82.1697	80.2137	57.2263	71.133	43.1943
YBR156C	SLI15	19.6808	19.8268	22.5252	19.1901	21.2019	21.9004	17.9873	15.9723	18.8847	13.3532	13.7507	12.4577
YBR157C	ICS2	33.1959	33.6851	36.8525	123.265	161.293	166.306	42.6494	52.4264	52.6029	134.524	168.017	173.865
YBR158W	AMN1	188.446	213.11	197.755	234.131	182.853	234.124	184.831	188.981	186.179	259.475	227.749	183.95
YBR159W	IFA38	203.025	218.79	190.827	184.869	188.161	188.399	168.324	167.101	154.139	123.578	125.683	118.712
YBR160W	CDC28	85.7933	78.6557	82.607	103.043	118.514	115.039	70.2305	72.0858	74.6872	111.133	99.5707	109.454
YBR161W	CSH1	33.5999	30.0472	35.0789	32.5882	39.7563	39.8708	26.8124	26.8553	27.6332	37.2725	26.8013	41.0146
YBR162C	TOS1	679.366	660.16	648.553	317.743	244.489	303.897	638.268	576.379	560.388	229.851	235.145	194.818
YBR162W-A	YSY6	761.466	617.859	909.745	451.505	474.787	317.127	600.169	669.48	551.381	265.228	356.44	182.072
YBR163W	EXO5	37.4648	41.1361	40.1473	36.1078	31.5994	32.7767	38.8913	43.6263	41.3463	31.4772	30.4937	27.1193
YBR164C	ARL1	136.582	174.538	160.041	138.897	131.678	161.552	125.776	154.366	124.635	94.2391	102.197	99.0753
YBR165W	UBS1	39.7758	40.586	45.728	41.5463	49.1051	48.7718	40.2796	45.8729	45.6867	47.2907	48.9025	51.1476
YBR166C	TYR1	65.2619	65.083	65.7918	80.8843	80.9203	82.3833	57.9211	59.6496	58.9069	53.6497	53.1473	51.0734
YBR167C	POP7	67.9268	53.5432	63.6202	66.1443	79.8311	79.0472	45.5884	65.4292	53.967	45.6554	71.8619	52.7597
YBR168W	PEX32	22.6553	22.5887	24.9287	32.287	38.6399	39.3449	23.6932	26.4501	26.4293	34.4478	32.2773	33.3926
YBR169C	SSE2	30.848	22.1031	29.3842	147.541	188.565	169.684	44.8073	54.0483	51.4297	589.439	542.154	667.39
YBR170C	NPL4	48.2783	46.4747	48.0772	91.393	102.155	89.3779	47.3039	54.1565	50.8259	122.206	123.018	109.441
YBR171W	SEC66	195.477	213.056	189.918	183.328	199.757	187.974	157.308	168.193	175.445	102.005	110.563	107.905
YBR172C	SMY2	64.9745	66.4816	62.8885	102.59	84.3143	96.1612	73.6817	66.7159	57.6173	48.0545	56.7063	34.9847
YBR173C	UMP1	331.563	267.331	333.249	478.923	536.778	472.757	294.97	319.175	296.381	414.726	523.932	519.845
YBR174C	YBR174C	1.66986	4.01037	0	0	1.75859	4.13703	0	0	0	0	0	0
YBR175W	SWD3	58.0362	56.3517	48.5425	70.6533	64.9249	66.6071	46.3769	57.882	55.222	63.3535	60.2789	63.6585
YBR176W	ECM31	37.1528	40.2649	42.2299	53.2737	45.8332	44.8027	32.3832	30.7987	36.0496	35.0138	35.8403	32.8381
YBR177C	EHT1	91.9463	82.6402	93.4217	112.376	131.21	119.543	74.3131	75.7349	70.3308	212.325	162.489	199.648
YBR178W	YBR178W	0	0	0	0	1.90119	5.59533	2.10171	0	0	0	0	0
YBR179C	FZO1	26.9666	28.6057	28.7563	39.4074	39.5545	41.4036	26.5205	27.8562	27.8287	29.9279	30.6185	26.5103
YBR180W	DTR1	0.744519	0.293957	0.47767	0.604554	0.807193	0.742477	0.425012	0.907678	0.663547	0.404819	0.549768	0.335726
YBR181C	RPS6B	3278.87	3412.41	3310.56	2039.82	1810.76	1798.99	3276.67	3356.45	3390.84	317.613	497.61	291.412
YBR182C	SMP1	4.51015	5.69353	4.67664	11.7776	10.9449	12.5064	6.43568	5.66165	4.64618	8.36241	8.22518	8.21225
YBR182C-A	YBR182C-A	0	0	0	0	0	0	0	0	0	0	0	0
YBR183W	YPC1	21.0694	19.7291	19.7066	34.7459	51.2171	41.4204	16.0515	17.3267	18.5029	40.7407	31.7228	57.138
YBR184W	YBR184W	5.76554	7.49339	6.03174	6.25773	6.89267	5.46235	4.6577	5.56444	7.48297	2.16848	2.19188	3.55834
YBR185C	MBA1	50.0199	54.9036	52.0949	73.3793	86.5572	84.3974	51.136	48.979	49.4059	46.6659	51.9784	47.0855
YBR186W	PCH2	0.206487	0.0747417	0.404832	4.04068	4.37806	4.37994	0.288174	0.307726	0.421752	3.54153	3.5155	4.43959
YBR187W	GDT1	223.393	242.792	223.626	160.798	130.859	142.238	227.168	211.569	201.383	67.6241	78.7504	63.9158
YBR188C	NTC20	69.2394	62.2157	55.9696	67.9564	88.4795	73.6224	42.3061	58.3344	54.3758	43.3495	56.3532	55.5861
YBR189W	RPS9B	5152.43	5669.11	5227.53	2418.59	2345.48	2297.36	4923.42	4788.13	5025.76	295.902	490.146	244.187
YBR190W	YBR190W	3.45781	0	0	0	1.82484	0	0	0	4.36234	0	2.76392	0
YBR191W	RPL21A	4303.37	4725.27	4382.01	2186.76	2003.74	1885.11	4122.09	3831.88	4530.19	283.379	435.351	215.157
YBR191W-A	YBR191W-A	0	0	0	0	0	0	0	0	0	0	0	0
YBR192W	RIM2	48.0596	51.3094	44.2315	63.1161	62.6838	66.1313	41.4539	41.2282	47.5243	30.3729	32.3399	27.578
YBR193C	MED8	52.6297	43.1736	54.8278	64.208	77.0632	74.6075	41.9597	40.7077	46.6068	58.421	63.0733	69.0015
YBR194W	AIM4	16.1828	25.6417	18.9683	47.2705	58.5239	47.1036	24.8117	19.9441	36.9309	44.9361	32.6628	46.1346
YBR195C	MSI1	33.9434	33.6481	32.5973	42.9961	38.6615	40.5356	27.1742	32.786	35.4837	27.7842	30.4474	29.1411
YBR196C	PGI1	1327.01	1319.96	1294.69	1315.74	1164.19	1177.52	1141.26	1098.49	997.954	1096.32	1030.13	1062.82
YBR196C-A	YBR196C-A	0	0	0	0	0	0	57.5121	0	0	0	0	85.52
YBR196C-B	YBR196C-B	0	0	0	0	0	0	0	0	0	0	0	0
YBR197C	YBR197C	51.2591	50.7361	56.2624	41.0778	42.1989	48.9909	48.4516	47.4641	42.6248	32.4337	33.3387	33.7307
YBR198C	TAF5	49.1221	52.8198	53.6539	61.084	60.6269	61.6325	54.145	56.1028	49.1602	47.3699	48.8526	39.6033
YBR199W	KTR4	153.82	158.134	149.531	184.421	196.81	200.687	127.001	127.445	137.4	170.549	153.752	180.435
YBR200W	BEM1	37.0865	38.7428	39.636	49.7828	50.8955	52.5455	37.8636	35.0533	35.3906	50.2213	49.4082	47.4306
YBR200W-A	YBR200W-A	0	0	0	0	0	0	0	0	0	0	0	0
YBR201C-A	YBR201C-A	9.58138	11.7525	53.3087	15.4365	11.5904	12.0658	11.9141	27.4262	49.4271	29.1529	14.9546	0
YBR201W	DER1	31.536	29.8402	33.4711	40.0032	57.1162	49.699	25.0409	32.7658	28.8474	40.0643	37.198	51.5377
YBR202W	MCM7	45.0227	47.7816	50.7274	33.996	28.0775	32.0453	49.1527	48.2326	46.9358	39.7391	34.1608	30.0578
YBR203W	COS111	3.20383	2.32649	3.62247	5.85927	7.02176	8.66674	4.89118	4.30679	4.40076	8.2516	8.30913	8.1775
YBR204C	YBR204C	38.5353	35.5972	41.0258	64.6733	74.9995	68.0611	31.7348	36.8808	36.7401	70.5751	66.4599	75.1305
YBR205W	KTR3	119.853	136.461	130.214	111.527	110.449	116.549	113.557	110.991	100.223	81.0456	77.3146	84.0406
YBR206W	YBR206W	111.152	103.064	115.446	81.9659	63.4805	70.7661	81.4827	82.8176	77.8442	57.3471	48.477	44.3399
YBR207W	FTH1	111.748	97.6553	124.171	84.2184	79.0062	88.0058	67.2097	80.7176	74.254	84.2026	89.3228	76.8696
YBR208C	DUR1,2	10.9522	15.7435	17.293	13.6546	11.1822	14.0488	11.05	10.4842	9.17652	13.2278	13.4337	11.9755
YBR209W	YBR209W	0	0	0	0	0	0	0	0	0	0	0	7.90534
YBR210W	ERV15	93.5613	88.4544	88.3099	94.8835	91.5567	72.6191	44.8816	65.1439	60.6198	67.6208	52.0323	62.2993
YBR211C	AME1	35.5162	36.2468	39.8625	29.5618	34.6833	32.8425	32.0144	36.7526	34.5251	34.1018	35.068	34.086
YBR212W	NGR1	69.9782	61.0956	66.8947	72.5162	81.07	85.6938	64.5623	66.2703	64.8234	106.809	95.1064	105.399
YBR213W	MET8	17.6321	14.8631	13.9469	13.3895	12.6123	12.8941	14.721	16.5576	9.85788	5.9402	13.9398	6.58851
YBR214W	SDS24	43.7966	36.5929	45.3476	99.6716	137.661	127.557	33.6317	36.3348	41.1894	188.947	162.454	194.202
YBR215W	HPC2	30.7856	32.7421	31.6054	43.0925	45.7928	46.379	32.0037	29.6439	27.1122	42.8692	42.914	39.432
YBR216C	YBP1	23.9532	24.1904	25.4911	30.158	35.7223	34.9478	25.9983	25.0458	24.2124	38.0084	32.7853	36.0348
YBR217W	ATG12	40.1957	38.7549	31.7967	45.6018	49.2659	45.8074	30.043	36.224	38.6615	42.806	44.6927	46.2306
YBR218C	PYC2	50.9962	54.6905	53.393	71.649	64.6652	69.4008	57.8329	49.9173	42.6829	60.2957	54.0979	55.7212
YBR219C	YBR219C	1.12629e-06	3.08375e-07	1.1857e-06	3.79356e-07	3.84147e-06	2.1696e-06	1.12913e-06	1.18078e-06	2.24442e-06	4.3325e-06	7.20034e-07	9.38355e-07
YBR220C	YBR220C	47.0991	51.3365	49.3234	42.527	42.0163	42.7296	44.2155	42.2887	39.8988	29.2435	32.8829	26.1799
YBR221C	PDB1	474.219	472.874	469.659	517.194	470.714	477.377	424.879	423.251	416.782	463.109	443.864	453.726
YBR221W-A	YBR221W-A	0	0	0	0	0	0	0	0	0	0	0	0
YBR222C	PCS60	106.279	93.2255	113.61	159.424	156.984	148.452	79.2666	85.3741	76.3196	87.0461	93.1171	98.3604
YBR223C	TDP1	12.4335	12.0615	13.0228	18.077	22.0025	23.5079	11.7393	12.6972	11.0989	19.7112	19.7505	21.323
YBR223W-A	YBR223W-A	0	0	0	0	0	0	0	0	0	0	0	0
YBR224W	YBR224W	0.815676	0	0.492555	1.09243	0.409863	0	0.221654	0	0	1.07849	0.531698	0
YBR225W	YBR225W	14.6037	14.3749	16.4323	18.3837	22.2905	22.4233	14.5443	15.1875	13.767	28.1241	24.6591	28.7361
YBR226C	YBR226C	0	0	0	0	0	0	0	0	0	0	0	0
YBR227C	MCX1	42.956	40.9888	40.6436	49.107	47.9836	50.0922	36.7296	43.0047	40.6543	40.7222	40.2667	39.5152
YBR228W	SLX1	36.2557	41.0493	37.3164	48.999	49.5478	45.1654	35.0773	39.2409	31.4905	40.3292	42.3722	42.8466
YBR229C	ROT2	33.9223	35.0671	37.0633	55.0109	53.4693	58.2994	38.117	33.8801	28.4169	61.6798	56.8963	57.7394
YBR230C	OM14	158.302	131.703	135.406	431.081	481.08	495.314	129.045	150.466	171.669	718.424	627.736	749.948
YBR230W-A	YBR230W-A	153.559	100.431	156.899	214.75	323.443	231.979	178.332	73.4295	184.894	264.044	334.312	415.525
YBR231C	SWC5	44.2657	38.0476	44.2293	52.015	64.8711	52.4638	31.835	36.8245	40.3293	53.1581	60.0198	47.733
YBR232C	YBR232C	0	0	0	0	0	1.28185	0	0	0	0	0	0
YBR233W	PBP2	32.213	34.0483	35.604	36.955	33.0049	39.0105	29.6962	31.1044	34.2464	38.2346	35.8373	38.3257
YBR233W-A	DAD3	97.0536	147.31	152.168	58.9199	97.0989	54.6604	121.449	112.407	127.715	41.9205	78.8313	130.229
YBR234C	ARC40	193.865	188.999	205.216	278.799	271.821	280.612	152.097	169.407	171.755	225.808	217.885	227.602
YBR235W	YBR235W	20.3991	22.5815	19.7719	25.5365	22.0706	25.8236	20.9665	19.8592	18.8907	34.9739	32.7503	32.4911
YBR236C	ABD1	44.3163	45.9874	46.2833	69.1538	73.8909	78.5668	40.3265	41.4939	45.0364	73.7305	80.3885	78.1307
YBR237W	PRP5	23.0795	23.5549	26.3635	29.8115	32.6052	37.7666	25.5215	23.9644	20.5836	30.4993	32.5694	32.067
YBR238C	YBR238C	22.7851	24.8352	25.2718	29.7174	19.9043	30.7266	30.4688	25.8052	20.1201	10.959	17.0792	5.14977
YBR239C	ERT1	11.15	10.0147	11.8097	12.9117	13.6698	15.7248	10.588	10.7254	12.4824	11.4033	14.2632	9.87959
YBR240C	THI2	2.44906	1.97434	1.71015	3.94803	5.2324	5.1905	3.14079	2.03343	2.66981	3.93207	4.34833	4.63867
YBR241C	YBR241C	16.8954	12.6191	18.4466	55.7362	63.3632	64.6809	13.4979	13.2232	15.5862	76.1019	73.9629	73.7999
YBR242W	YBR242W	85.3998	82.2081	76.5882	59.6016	58.7119	59.4084	63.7814	71.8336	79.238	21.3752	20.3361	22.3239
YBR243C	ALG7	65.036	61.4515	65.4601	55.0025	58.243	55.3116	54.7488	52.5556	49.1099	43.1721	36.961	45.8563
YBR244W	GPX2	196.935	225.07	224.05	90.3804	100.284	114.147	110.088	137.065	141.809	66.4824	82.1669	74.9617
YBR245C	ISW1	33.8291	37.5966	34.6953	35.9412	29.3172	34.1202	33.6269	35.0134	31.6013	26.4277	25.1654	23.327
YBR246W	RRT2	60.0783	68.7524	58.3052	73.0247	75.0108	73.452	60.4566	58.9788	62.52	59.2918	60.34	52.8243
YBR247C	ENP1	82.1083	95.4328	90.8259	93.6331	63.8852	76.8842	94.919	95.5706	84.7336	22.9543	36.8126	15.6142
YBR248C	HIS7	68.6093	79.3105	72.7428	100.519	89.1804	94.3204	77.8536	75.8745	68.1172	56.1836	64.2685	50.0427
YBR249C	ARO4	350.588	369.909	358.893	176.708	133.758	146.791	375.7	353.074	339.77	29.3203	44.6125	26.5324
YBR250W	SPO23	0.904398	1.39221	2.12885	6.25773	6.36823	6.95208	2.05255	3.20377	3.41815	11.1135	12.0115	13.4842
YBR251W	MRPS5	53.0991	54.5099	56.2582	61.547	72.7566	68.4599	46.5329	49.9317	60.8029	32.719	35.0939	35.3488
YBR252W	DUT1	215.186	219.292	221.512	125.087	136.247	120.673	169.94	180.239	202.211	68.7326	76.3403	80.0173
YBR253W	SRB6	160.787	145.856	138.793	154.81	155.804	168.531	89.9334	140.036	129.215	170.973	194.279	162.044
YBR254C	TRS20	72.6483	78.0213	68.4058	71.093	73.3516	70.368	66.1654	61.7978	72.1593	45.9767	58.3692	46.0842
YBR255C-A	YBR255C-A	76.0988	49.5705	71.962	45.4949	51.7811	48.609	31.5968	62.4548	50.2404	48.9837	71.3896	53.5622
YBR255W	MTC4	19.5955	18.9056	21.5019	27.3277	27.4026	30.1444	20.3355	20.6558	19.4731	24.6352	26.2528	23.7488
YBR256C	RIB5	144.514	145.454	154.497	206.002	237.063	206.065	109.846	127.606	133.612	198.484	232.825	226.817
YBR257W	POP4	36.7516	42.0484	35.5704	45.359	44.4297	47.4677	33.0486	41.2481	42.4255	35.9261	45.8496	38.8722
YBR258C	SHG1	53.7346	47.8524	51.9014	60.9344	68.5075	75.226	34.3624	46.2067	46.8426	54.8038	60.8513	64.1051
YBR259W	YBR259W	16.7392	16.1406	14.2872	21.3892	22.912	25.6734	15.8974	17.0935	13.5581	23.7171	21.6708	19.6105
YBR260C	RGD1	26.4096	26.7701	28.0098	39.1641	39.4264	43.3442	29.2325	29.0613	24.4807	53.3299	49.8098	41.5607
YBR261C	TAE1	107.545	96.7783	102.649	124.91	128.709	114.447	81.3678	84.4972	89.7685	77.5001	109.77	89.4475
YBR262C	AIM5	181.78	117.743	157.167	85.003	173.462	167.738	83.5574	109.803	177.885	79.5516	128.65	121.756
YBR263W	SHM1	209.48	234.203	220.386	165.317	125.44	137.226	222.999	210.407	196.248	100.556	108.589	95.1542
YBR264C	YPT10	61.335	65.5269	71.3171	72.96	95.6143	77.3796	49.3557	63.7204	65.6764	64.1074	82.8033	84.0192
YBR265W	TSC10	104.642	98.0621	104.365	76.7829	82.1372	76.6328	88.6159	93.92	107.318	34.4334	41.6345	40.0985
YBR266C	SLM6	0	0	0	0	0	0	0	0	0	0	0	0
YBR267W	REI1	93.2859	95.7053	101.122	115.167	70.1868	89.6941	108.842	108.31	97.7971	36.281	63.4085	26.7506
YBR268W	MRPL37	206.558	176.117	222.608	219.128	208.593	223.61	122.335	149.05	205.416	97.4333	115.473	102.769
YBR269C	FMP21	124.833	101.314	132.443	209.175	233.93	203.456	77.2301	94.4651	122.441	202.856	215.895	237.261
YBR270C	BIT2	15.5614	14.021	13.669	18.7692	16.2515	17.7885	11.7133	12.8293	13.7111	15.2869	15.1648	13.9757
YBR271W	YBR271W	39.4172	47.6944	40.6251	44.0316	33.979	35.1141	38.7575	40.4434	43.0568	18.098	22.2366	10.9219
YBR272C	HSM3	28.2085	29.2214	29.3768	46.5667	49.2731	47.2085	23.6952	24.9344	26.6842	46.4224	41.9868	42.1571
YBR273C	UBX7	53.0474	45.1139	56.1296	85.596	96.6121	91.6613	44.5871	47.3157	43.5892	109.515	99.7812	112.305
YBR274W	CHK1	30.3179	32.0493	29.4408	38.0564	35.6803	40.3416	25.8104	26.562	28.0088	38.3085	38.0405	37.8479
YBR275C	RIF1	15.1106	17.2007	17.3181	12.4482	10.1547	12.4329	15.1976	17.244	14.7021	10.0933	8.88501	7.46028
YBR276C	PPS1	40.7309	46.0213	41.7142	38.2509	40.3152	41.5628	44.3251	44.5272	41.1096	46.2352	40.6884	39.5761
YBR277C	YBR277C	0.755496	0.874386	0	0	0	0.899652	0	0	0	0	0	0
YBR278W	DPB3	59.9208	51.4372	58.6191	58.7324	70.3914	59.1174	42.3733	49.5331	55.6773	52.015	58.4344	56.9943
YBR279W	PAF1	88.9988	91.4145	98.6496	102.47	113.634	110.713	85.7713	86.2133	90.0864	93.6338	98.8323	94.9191
YBR280C	SAF1	13.6532	10.6726	14.8578	25.2669	38.8897	34.2989	11.1279	13.5783	12.9287	64.2886	52.6468	70.9796
YBR281C	DUG2	25.227	26.5567	25.0487	33.6482	34.5158	35.3042	25.7631	24.3199	22.634	23.2734	20.4577	21.0912
YBR282W	MRPL27	100.636	75.3274	111.491	109.669	125.571	129.799	69.6061	79.3239	90.0691	75.7937	86.0001	87.4192
YBR283C	SSH1	294.431	324.929	306.147	248.836	245.281	266.066	319.872	294.735	280.04	192.488	190.257	170.201
YBR284W	YBR284W	5.67064	4.89491	4.22262	8.73873	11.8587	9.07654	5.05399	5.24064	5.58919	13.0173	10.1989	12.5093
YBR285W	YBR285W	3.04811	0.697906	2.2381	51.9145	82.6683	64.5019	1.35007	5.83021	4.55314	78.8854	70.162	94.4432
YBR286W	APE3	556.398	574.077	585.707	999.196	975.695	1044.49	547.606	503.818	460.026	811.689	722.637	752.35
YBR287W	YBR287W	65.6157	66.9172	67.7584	131.884	137.969	140.338	68.7951	66.7575	54.689	194.727	157.845	167.577
YBR288C	APM3	49.8797	57.3139	51.649	48.9675	50.2161	51.0431	47.8078	51.6221	51.7364	37.5253	33.2282	35.6748
YBR289W	SNF5	18.2924	18.9617	18.4897	18.7783	20.4462	19.7504	19.1267	18.4329	19.0427	14.2356	15.4328	16.1991
YBR290W	BSD2	63.0361	61.5217	71.4768	79.4557	105.556	87.1242	57.8525	59.139	55.6868	87.9436	82.9734	86.1001
YBR291C	CTP1	28.8256	32.2696	30.8034	37.6538	37.7869	41.5792	24.8411	25.5046	27.3426	20.384	27.9032	25.6366
YBR292C	YBR292C	2.85578	1.11485	1.18552	4.05176	0	3.4466	0	3.51955	0	0	0	0
YBR293W	VBA2	37.1525	36.3877	39.2533	35.2345	35.676	35.3058	31.3805	37.8993	38.8835	38.9405	41.9692	36.5848
YBR294W	SUL1	0.169517	0.0917935	0.0994989	0.431074	0.883754	0.231646	0.132682	0.236033	0.155671	0.754947	0.487698	0.469973
YBR295W	PCA1	9.31449	9.76102	10.8889	13.8766	11.1118	12.9733	7.35492	7.5912	7.0098	9.27438	9.87673	8.13488
YBR296C	PHO89	4.04418	5.34233	4.12256	5.59023	3.5503	6.65435	5.39628	3.46489	3.30396	10.3196	9.46289	4.42962
YBR296C-A	YBR296C-A	0	0	0	0	0	0	0	0	0	0	0	0
YBR297W	MAL33	9.50085	10.0535	7.93587	12.7077	14.945	13.9162	11.3682	10.3531	12.6034	11.2185	11.597	10.4385
YBR298C	MAL31	14.8765	13.5769	17.198	7.30149	10.5145	10.4393	18.6196	16.8221	19.9432	11.3	11.752	16.187
YBR298C-A	YBR298C-A	0	0	0	0	0	0	0	0	0	0	0	0
YBR299W	MAL32	1.38673	1.25453	1.35909	3.53815	4.85619	4.57713	2.31476	2.91438	2.34664	5.76368	5.39916	5.68879
YBR300C	YBR300C	2.64392	1.49079	1.06686	0	0.221666	1.017	3.36395	0.516846	0.546426	0	1.16152	0
YBR301W	PAU24	11.4405	3.77824	23.1306	4.40274	2.11351	2.49277	8.48432	6.69158	5.15286	4.59222	6.20779	0
YBR302C	COS2	80.9127	77.2678	79.4431	93.0904	104.245	107.882	62.6927	63.3172	65.2531	90.181	79.7579	89.7156
YCL001W	RER1	248.647	246.343	213.825	202.111	227.022	213.754	172.773	201.758	216.318	146.859	144.259	126.181
YCL001W-A	YCL001W-A	0.524306	0.595877	0.638266	0.71293	2.11603	3.05475	2.88167	0	0.65148	4.29025	2.8378	3.65448
YCL001W-B	YCL001W-B	0	0	0	0	8.42106	0	0	5.12257	0	5.8872	6.09706	6.67126
YCL002C	YCL002C	49.1055	52.493	50.1453	41.3527	36.5096	43.0462	43.9592	39.4041	44.2725	27.8987	33.6628	34.2775
YCL004W	PGS1	16.2035	15.7976	18.0017	23.988	28.3768	31.3483	18.0837	15.5859	17.913	27.6888	24.3138	27.755
YCL005W	LDB16	58.4808	49.7798	63.8593	55.9832	55.9992	53.839	51.407	49.8541	60.549	45.6576	52.2098	44.3284
YCL005W-A	VMA9	710.588	660.191	629.918	434.063	570.577	435.349	558.358	552.346	546.691	368.934	412.012	461.199
YCL007C	YCL007C	0	0.936593	0	4.52081	0	0.964138	0	0	1.00733	1.16517	0	0
YCL008C	STP22	31.4623	27.4246	33.6022	51.0585	51.1575	46.6986	34.1358	30.0044	27.463	44.6808	55.0286	47.361
YCL009C	ILV6	255.134	242.352	307.871	267.995	259.893	244.575	317.32	298.81	281.739	178.869	232.948	224.83
YCL010C	SGF29	70.8229	62.5298	70.3061	87.9762	81.3246	75.3757	72.0956	70.7636	67.5774	85.9747	90.6806	92.4583
YCL011C	GBP2	210.222	228.616	208.645	186.525	204.785	198.231	198.04	189.944	207.224	137.612	150.464	138.275
YCL012C	YCL012C	56.9593	65.8515	61.0925	107.126	89.4974	99.4146	38.0516	54.6333	59.0688	101.425	86.8765	93.946
YCL014W	BUD3	13.1003	13.9068	13.8227	13.5099	10.7845	14.0043	14.2531	13.4763	11.6223	12.5305	10.4464	10.1706
YCL016C	DCC1	24.569	27.4133	31.5287	37.4843	36.2309	36.573	18.4935	30.9118	23.7909	26.2227	30.3982	29.1209
YCL017C	NFS1	74.5831	76.9857	75.916	93.9018	74.2329	81.6924	65.7266	71.0076	64.694	83.4728	81.2958	71.3313
YCL018W	LEU2	0	0	0	0	0	0	0	0	0	0	0	0
YCL019W	YCL019W	27.119	23.088	25.2393	27.1519	31.1654	31.2208	18.7323	18.6938	14.4361	17.44	14.1215	16.6078
YCL020W	YCL020W	1.10282e-06	8.54589e-07	7.75552e-07	1.28696e-06	1.18779e-06	1.57893e-06	7.19925e-07	1.04403e-06	8.04352e-07	7.99347e-07	1.31539e-06	5.22673e-07
YCL021W-A	YCL021W-A	19.0278	24.3459	20.2692	33.3002	29.6588	19.629	23.5546	20.0288	24.9319	7.97157	12.0729	19.0724
YCL022C	YCL022C	0	0	0	0	0	0	0	0	0	0	0	0
YCL023C	YCL023C	0	0	0	0	0	1.44072	0	1.47806	0	0	0	0
YCL024W	KCC4	17.9237	18.5394	19.1307	13.1078	12.5002	14.3509	17.1103	15.6189	15.2866	8.96806	8.05538	9.98409
YCL025C	AGP1	40.181	39.228	43.7039	42.4124	53.8876	52.7858	39.8181	37.7522	34.2901	75.059	71.3963	73.8904
YCL026C-A	FRM2	0.6399	1.78245	1.53552	1.69306	1.60299	0	1.03358	1.84791	2.37226	0	1.6189	1.27094
YCL026C-B	HBN1	19.517	12.4772	18.0424	36.4008	33.0216	28.7128	11.0249	15.5224	9.48904	30.5155	45.3293	45.3304
YCL027W	FUS1	23.2785	25.4681	22.3037	30.1394	32.9834	35.8489	6.40108	13.8458	12.3246	5.47334	9.27272	10.0944
YCL028W	RNQ1	142.406	137.895	151.95	166.544	172.24	158.249	123.049	136.019	137.437	147.679	153.952	151.345
YCL029C	BIK1	42.9215	38.4969	43.7689	38.8352	41.0216	36.9781	40.7404	38.9196	35.2483	34.6319	35.8152	32.0265
YCL030C	HIS4	113.23	127.255	113.849	90.9401	84.4196	86.0824	98.1529	96.8811	84.5575	90.5052	89.8848	72.7999
YCL031C	RRP7	135.564	137.288	138.856	144.548	139.381	142.317	131.958	138.269	140.188	115.778	121.081	101.978
YCL032W	STE50	43.8177	41.7272	45.5935	53.5944	52.1551	52.987	41.3232	42.0139	37.9613	40.5829	42.4944	40.3745
YCL033C	MXR2	127.512	101.112	134.197	247.901	270.909	237.569	88.0914	93.7144	113.942	159.216	246.509	246.608
YCL034W	LSB5	97.1043	92.5121	97.6015	101.796	117.152	103.787	78.92	71.6671	84.8537	99.6862	105.429	104.23
YCL035C	GRX1	311.262	330.028	376.881	1307.81	1560.45	1454.47	221.903	272.694	322.422	1710.61	1758.14	1977.5
YCL036W	GFD2	25.5651	28.8767	24.9126	59.6526	26.7705	40.8309	27.332	29.6459	26.6262	3.3623	8.67133	1.95525
YCL037C	SRO9	3.60777	5.37527	5.59561	9.60746	5.00527	7.31772	7.57468	4.57852	2.91132	1.2591	1.55631	1.54113
YCL038C	ATG22	26.7468	23.3946	27.0056	39.586	37.7708	38.285	22.6294	22.5838	18.721	48.7559	36.7382	41.0913
YCL039W	GID7	27.0751	24.921	29.9898	42.6329	48.3966	48.9085	22.353	24.5831	23.041	58.6396	55.0024	60.3957
YCL040W	GLK1	313.974	201.288	297.391	1143.08	1304.59	1144.43	201.475	222.848	233.428	1309.77	1127.34	1524.27
YCL041C	YCL041C	9.82579	3.02373	5.40885	4.81037	7.19094	8.76804	3.89894	5.76655	7.20096	11.9381	10.0263	7.94281
YCL042W	YCL042W	38.0288	23.7285	25.1044	116.292	125	126.931	15.6549	18.3622	20.1238	148.254	153.625	154.314
YCL043C	PDI1	573.134	533.563	600.582	974.636	906.543	874.699	525.812	536.199	509.193	626.003	688.658	701.525
YCL044C	MGR1	25.6736	26.6613	29.6856	58.3915	55.2579	57.1267	28.5404	32.0627	28.6771	72.7288	69.4763	70.0657
YCL045C	EMC1	124.213	132.288	121.029	130.087	123.033	132.712	131.804	119.87	113.212	123.41	115.184	105.139
YCL046W	YCL046W	0	0	0	0	0	0	0	1.92644	1.90068	0	0	0
YCL047C	YCL047C	42.7487	43.3731	47.079	79.6416	82.0104	88.9161	31.7094	38.3721	36.9957	60.3462	73.5291	76.2838
YCL048W	SPS22	0.175067	0.2857	0.20624	0.448027	0.435247	0.48142	0.183627	0.392299	0.429359	0.842459	0.817916	1.09093
YCL048W-A	YCL048W-A	0	0	0	90.669	82.4735	96.7812	0	0	18.4512	89.8129	209.001	199.044
YCL049C	YCL049C	34.9413	26.9508	42.7534	55.5568	51.7092	56.8482	23.3533	32.7965	32.2454	45.3013	53.7604	49.0706
YCL050C	APA1	373.967	384.317	354.954	484.954	515.928	478.948	562.679	563.419	528.85	1448.82	1454.77	1319.34
YCL051W	LRE1	28.5851	28.6618	31.5955	31.4022	37.482	32.7298	29.288	31.4215	29.8388	34.8911	28.5484	36.0898
YCL052C	PBN1	56.716	55.6716	54.8288	85.1633	94.4082	82.7004	53.68	54.3169	52.6143	124.503	102.254	123.159
YCL054W	SPB1	75.771	85.1705	72.8557	82.503	49.689	70.5079	84.7007	82.8173	76.3062	22.9927	38.9168	11.4996
YCL055W	KAR4	62.4852	71.3654	73.2466	126.049	136.299	138.336	50.6776	67.2698	64.1154	83.6705	91.5317	88.3917
YCL056C	YCL056C	63.4006	66.999	72.3653	80.3838	95.0069	83.8525	41.8521	45.1841	72.0914	80.5819	83.6872	73.6484
YCL057C-A	YCL057C-A	435.435	323.591	408.44	509.718	492.139	481.643	308.966	322.382	428.425	307.391	460.502	422.976
YCL057W	PRD1	122.235	118.423	116.634	223.647	231.388	221.89	115.168	127.273	110.876	239.1	219.804	217.625
YCL058C	FYV5	1.06531	3.6349	0.648779	0.725029	0.53759	1.2425	1.1719	1.263	0	0	0.72256	0.743995
YCL058W-A	ADF1	136.399	115.832	113.61	157.688	102.455	98.0315	107.947	119.626	124.153	51.3145	120.198	72.9912
YCL059C	KRR1	161.749	188.892	166.049	89.4799	60.0178	76.0979	153.177	174.084	151.226	27.81	40.688	15.7496
YCL061C	MRC1	17.4863	17.7624	18.7641	18.6663	17.6801	20.9284	17.7222	16.8953	16.5679	20.5929	18.0148	18.1094
YCL063W	VAC17	39.4322	34.4003	37.8183	38.0879	34.251	38.5748	48.3112	44.9019	41.874	33.7348	31.3874	27.335
YCL064C	CHA1	351.892	322.817	312.664	1214.82	1251.58	1297.98	269.521	275.669	288.396	716.902	666.357	506.108
YCL065W	YCL065W	2.92898	1.71733	3.65171	1.38785	3.83837	1.17997	1.66189	2.41096	3.05559	2.64842	3.65533	4.20525
YCL066W	HMLALPHA1	0	0	0	0	0	0	0	0	0	0	0.251592	0
YCL067C	HMLALPHA2	47.0079	49.9923	46.2687	51.3306	58.7629	54.6106	41.598	49.5357	54.2611	62.0734	65.0093	71.9797
YCL068C	YCL068C	2.02529	1.30808	2.52037	3.96696	3.23999	4.16204	2.01327	1.82589	1.38463	4.02848	3.11252	3.00512
YCL069W	VBA3	0.13309	0	0.26134	0.34066	0.485319	0.390452	0	0.298283	0.108808	0.16017	0.259187	0.110614
YCL073C	YCL073C	0.21744	0.101125	0.0730427	0.158422	0.0925973	0.170248	0.194935	0.242826	0.152237	0.185494	0.251852	0.0384658
YCL074W	YCL074W	0	0	0	0	0	0	0.158611	0	0.184515	0	0	0
YCL075W	YCL075W	0	0	0	0	0	0	0	0	0.732269	0	0	0
YCL076W	YCL076W	0	0	0	0	0	0	0	0	0	0	0	0
YCR001W	YCR001W	0	0	0	0	0	0	0	0	0	0	0	2.73897
YCR002C	CDC10	156.554	153.822	151.003	152.935	151.744	158.162	130.823	141.784	132.2	147.864	134.502	134.361
YCR003W	MRPL32	91.8824	76.5587	93.0369	87.7247	107.122	102.438	80.1439	94.2663	93.4764	77.1467	77.2159	85.328
YCR004C	YCP4	250.583	224.922	236.147	401.616	391.233	374.75	195.131	208.884	227.477	430.166	378.204	409.847
YCR005C	CIT2	192.287	138.358	182.354	431.391	509.884	496.355	98.6777	138.237	133.214	418.267	388.156	468.713
YCR006C	YCR006C	4.93249	8.94407	9.58786	8.01716	7.4571	7.44582	12.9757	6.98592	4.28714	8.00891	7.93321	9.55536
YCR007C	YCR007C	12.1174	8.50403	7.86832	15.8019	17.6034	16.0443	5.86468	8.53987	10.5834	14.6066	16.9578	19.0383
YCR008W	SAT4	57.2881	56.4486	56.8209	80.5989	77.3983	85.1859	64.9833	61.3607	59.3655	67.5367	65.3546	68.9192
YCR009C	RVS161	230.418	218.869	207.305	217.851	243.53	229.602	187.989	184.362	181.624	245.733	224.702	241.215
YCR010C	ADY2	2.03686	0.558674	0.805043	5.27399	5.41602	6.60928	1.61728	0.961146	0.417438	4.18318	4.48375	2.59263
YCR011C	ADP1	45.5895	45.9863	43.6789	69.8912	74.3637	82.833	44.1326	47.779	43.746	86.8958	79.3384	87.6353
YCR012W	PGK1	7710.22	6385.32	7237.7	9196.03	9380.56	8114.41	8115.2	8669.89	8178.94	12690.9	13467.6	15253.7
YCR013C	YCR013C	0.26307	0.582811	0.314236	0.690367	1.05244	0.889502	0.84443	1.20646	1.62247	0.999991	1.63112	0.343141
YCR014C	POL4	16.4434	18.1393	18.0915	18.694	20.7561	20.7982	16.1658	16.521	16.8998	13.0816	12.3044	13.233
YCR015C	YCR015C	25.373	24.6096	23.8831	40.9114	42.0839	41.393	22.0665	24.8964	27.9851	27.3289	35.0075	29.7138
YCR016W	YCR016W	111.355	133.139	122.269	77.1045	66.9347	72.4487	114.517	118.599	107.91	35.8552	44.347	23.101
YCR017C	CWH43	78.6083	87.586	79.7069	73.4015	70.6255	79.3219	77.3861	75.0686	69.7497	59.6027	57.2235	55.7624
YCR018C	SRD1	61.2193	67.4506	57.4867	61.4548	79.014	67.1882	87.3952	96.4983	99.3035	111.178	127.953	160.987
YCR018C-A	YCR018C-A	43.164	89.5412	87.9378	119.747	136.842	85.0546	50.1854	87.0837	69.5128	82.4208	118.893	130.09
YCR019W	MAK32	31.6151	23.7903	29.2772	41.871	46.6136	41.9425	21.9356	26.8131	26.3147	30.5384	38.032	37.1687
YCR020C	PET18	11.049	14.2789	10.3698	13.117	18.1547	16.604	10.9776	12.6678	13.3043	4.66663	12.7228	9.95108
YCR020C-A	MAK31	278.267	251.816	331.544	158.996	151.925	165.02	158.398	244.465	260.829	78.6371	106.904	82.223
YCR020W-B	HTL1	202.137	204.527	116.742	175.432	273.327	172.006	223.417	252.849	226.836	181.004	154.581	127.911
YCR021C	HSP30	5.54237	5.61587	7.99239	14.2801	22.0809	14.6678	5.98722	9.14404	9.62981	273.721	200.529	442.884
YCR022C	YCR022C	4.86007	1.43995	0	0	1.25747	0	8.37148	1.52488	0	0	3.75108	0
YCR023C	YCR023C	43.0716	39.5405	40.0426	36.9595	41.1815	41.5199	37.0628	37.3358	38.5829	27.0699	27.2324	29.8503
YCR024C	SLM5	21.1926	18.1864	18.6437	42.7684	40.1239	43.191	17.362	20.1801	18.0184	33.3475	30.7583	29.8052
YCR024C-A	PMP1	9221.31	6763.12	7566.77	8497.58	11353.6	9073.27	10514.3	11466.3	10166.8	5464.43	6837.56	3902.3
YCR024C-B	YCR024C-B	2782.67	3353.73	2805.69	2158.49	2285.78	2459.58	3680.88	3017.88	3110.03	1684.14	1781.74	1578.68
YCR025C	YCR025C	4.96928	3.27596	2.621	1.97116	0	1.68444	7.12944	5.14273	0.885291	1.0083	2.01951	4.12105
YCR026C	NPP1	30.4999	28.5047	33.0064	39.5851	38.8365	46.7827	31.857	32.8366	28.9037	36.836	37.3208	30.8018
YCR027C	RHB1	44.0987	37.1088	34.3828	34.8943	47.0297	44.0198	28.4424	37.471	33.4362	35.1738	38.9247	32.5722
YCR028C	FEN2	37.1219	37.4037	35.5039	33.3015	29.5236	34.1074	36.0162	35.7395	33.5607	32.4689	33.6699	26.5338
YCR028C-A	RIM1	510.076	502.056	467.611	371.728	331.304	383.846	424.91	468.663	460.021	274.494	258.529	234.11
YCR030C	SYP1	27.2828	26.8759	30.4075	38.8828	41.5297	46.9954	28.2962	26.1998	24.8619	39.5891	32.1117	38.9142
YCR031C	RPS14A	6212.92	6082.07	6039.9	3008.05	2915.84	2758.27	6067.12	6131.41	6470.91	719.464	1013.96	636.879
YCR032W	BPH1	6.75533	8.27818	7.71165	11.0786	11.5542	11.3701	7.12679	7.88175	6.53836	12.1742	11.9268	12.6808
YCR033W	SNT1	32.6861	34.8539	36.144	33.8751	34.1796	35.4468	34.4477	35.5798	31.3711	34.2918	33.4398	35.6659
YCR034W	FEN1	226.375	249.788	222.406	134.108	121.766	124.833	222.287	198.629	200.155	53.7361	53.7674	42.4543
YCR035C	RRP43	84.8085	84.0191	87.2571	101.379	91.2398	104.925	78.6467	74.5001	76.6329	80.6388	89.6056	65.0337
YCR036W	RBK1	87.3686	84.7676	92.0057	173.933	194.819	184.214	82.7118	97.1258	96.3939	179.781	185.765	198.504
YCR037C	PHO87	38.3357	39.0475	35.9929	51.8029	41.1326	46.3355	43.8289	41.0293	35.3443	49.7555	44.5192	31.4975
YCR038C	BUD5	7.53266	7.1996	7.70837	13.5656	15.5063	12.4072	7.11399	7.5624	7.53948	15.8033	15.6319	17.094
YCR038W-A	YCR038W-A	0	0	0	0	0	0	208.607	0	0	0	0	0
YCR039C	MATALPHA2	48.1959	51.6644	47.2519	52.5917	60.1115	56.4674	42.3812	50.585	55.1632	63.3514	68.5359	73.4143
YCR040W	MATALPHA1	0	0	0	0	0	0	0	0	0.481062	0	0.251592	0
YCR041W	YCR041W	4.1136	0.816902	6.94712	5.99913	5.47274	3.37073	2.37753	1.73691	2.58627	3.848	5.36674	6.20477
YCR042C	TAF2	16.4603	19.6927	19.0644	27.9232	26.6024	28.4235	19.3549	19.0997	16.6325	28.051	24.5679	25.117
YCR043C	YCR043C	151.175	159.062	168.218	148.441	149.102	165.893	134.399	165.987	153.335	107.024	137.078	147.028
YCR044C	PER1	83.272	79.6883	78.8401	78.2649	91.3178	90.2781	70.5372	68.9153	65.249	75.3041	59.4746	67.7536
YCR045C	RRT12	0.407004	0.442531	0.383398	0.624417	0.971217	0.626243	0.597258	0.364525	0.299398	1.27084	1.04372	1.3168
YCR045W-A	YCR045W-A	34.4141	29.8287	41.7767	41.2671	20.1304	37.753	30.2032	22.9351	34.5365	13.8216	12.3039	19.6436
YCR046C	IMG1	188.623	161.894	201.69	231.104	206.865	204.065	127.88	128.661	138.909	113.694	153.202	136.338
YCR047C	BUD23	57.745	59.1229	61.784	53.718	33.9197	40.4391	59.3076	60.6406	58.1697	17.9372	31.7699	12.6502
YCR047W-A	YCR047W-A	0	0	0	0	0	0	0	0	0	0	0	16.5372
YCR048W	ARE1	49.7407	45.4032	57.4515	61.5857	60.0841	60.1662	51.0439	49.5976	41.7316	57.0933	65.0357	57.7199
YCR049C	YCR049C	0	0.648862	0	0	0	0	0	0	0	0.783981	0.77966	0
YCR050C	YCR050C	0	0	0	0	0	2.22394	0	0	0	0	0	0
YCR051W	YCR051W	171.297	163.034	180.621	110.524	115.74	110.067	157.457	154.431	159.624	62.8283	93.3998	70.5349
YCR052W	RSC6	68.1952	64.7661	70.9195	76.1599	76.9761	75.4233	69.8395	67.8993	61.8189	53.4936	54.9283	46.3255
YCR053W	THR4	348.218	365.226	353.077	342.831	315.337	325.071	356.024	337.602	310.615	203.473	208.833	179.1
YCR054C	CTR86	19.7958	20.8225	20.8527	31.7784	26.3927	27.6224	17.905	21.0472	17.9203	15.4349	19.137	14.7165
YCR057C	PWP2	62.4716	75.1728	66.6604	74.4729	41.7152	56.7225	78.3126	74.7413	67.6234	15.0844	26.9364	7.70581
YCR059C	YIH1	122.585	102.635	116.886	92.8307	84.348	88.6982	102.175	97.8155	116.032	44.3508	68.0912	44.5197
YCR060W	TAH1	98.3718	118.637	112.639	112.184	118.841	89.7435	82.8385	72.2349	85.2132	66.98	85.0375	69.7566
YCR061W	YCR061W	13.2625	12.6233	16.2994	29.1234	26.7144	26.954	12.5447	12.7881	9.45373	29.5755	27.4941	33.5773
YCR063W	BUD31	10.3582	16.2111	10.7863	16.7024	9.9428	12.0279	20.5448	15.7183	16.5361	10.6785	10.5776	10.9204
YCR064C	YCR064C	2.83959	2.45697	0.873667	2.95674	3.60486	1.68444	0.79216	0.857122	1.77058	0	0	2.06053
YCR065W	HCM1	49.5569	60.765	57.4052	54.8127	43.3017	53.0879	49.9261	57.3139	52.9721	28.6617	27.2451	32.3578
YCR066W	RAD18	17.0203	19.8487	16.8475	25.3373	27.5515	25.8481	16.1181	19.8855	18.146	20.9389	20.4202	21.0816
YCR067C	SED4	42.0671	42.9504	43.7432	57.4933	55.4606	62.6406	39.6773	40.3732	36.7278	55.36	47.5407	52.6218
YCR068W	ATG15	22.3128	18.5563	20.0985	39.1693	38.1002	38.7569	19.2393	22.5	16.1873	51.2327	52.2761	49.9835
YCR069W	CPR4	121.282	116.529	126.865	171.239	163.586	177.078	97.7177	97.3561	96.1028	151.285	137.503	148.615
YCR071C	IMG2	82.9802	103.575	103.578	129.022	133.307	131.18	67.6545	96.1715	114.234	83.1286	91.6794	83.2564
YCR072C	RSA4	45.7666	51.6994	45.7359	56.021	31.6042	44.87	46.016	50.3477	48.1011	11.6042	22.4326	5.15392
YCR073C	SSK22	6.21971	7.6046	6.5845	7.45752	4.76655	5.55353	9.04909	7.35137	6.74434	3.90908	4.47634	2.60873
YCR073W-A	SOL2	66.618	48.7108	71.4366	127.42	117.097	100.959	52.8266	60.4271	62.0131	125.995	130.258	163.194
YCR075C	ERS1	43.2062	40.091	41.9297	41.841	51.7757	48.6529	32.9631	37.0291	39.8773	34.7008	27.7792	39.5194
YCR075W-A	YCR075W-A	189.926	131.1	154.33	245.036	179.983	157.146	175.686	149.773	190.643	128.733	123.384	194.481
YCR076C	YCR076C	65.4083	46.9607	57.2928	114.458	116.057	95.1321	41.8453	57.3891	58.8156	88.5964	110.392	124.587
YCR077C	PAT1	95.8914	92.8358	99.2104	87.5709	79.3461	88.1681	101.658	100.28	94.3032	90.4565	87.4539	86.9503
YCR079W	PTC6	26.441	20.198	28.2098	25.1861	37.4649	34.1093	23.8555	20.6997	22.0748	43.9306	38.9697	46.891
YCR081C-A	YCR081C-A	0	0	0	0	0	0	0	0	0	0	0	0
YCR081W	SRB8	7.41679	8.87352	8.25182	15.5384	14.5039	15.2467	8.59987	9.09512	8.37541	16.1739	17.1377	15.2376
YCR082W	AHC2	322.403	293.734	354.528	630.129	689.928	618.092	255.64	349.584	331.173	661.692	772.12	747.176
YCR083W	TRX3	130.443	135.907	144.646	265.248	289.381	270.612	142.191	155.414	116.621	433.133	506.428	524.917
YCR084C	TUP1	139.936	137.918	151.735	138.195	138.485	135.685	164.353	150.006	141.401	104.023	102.17	96.7081
YCR085W	YCR085W	0	0	0	1.60167	0	0	0	0	1.39874	0	0	0
YCR086W	CSM1	57.3608	34.929	41.1659	59.8299	48.5736	47.2473	29.1397	39.2718	41.1573	44.7418	63.5999	57.3283
YCR087C-A	YCR087C-A	134.222	143.01	151.269	76.9965	64.539	58.6511	123.335	118.614	155.052	31.4618	38.3103	18.2724
YCR087W	YCR087W	1.22351	0.458456	0.492555	0	0	0	0.443308	0.952858	0	0	0	0
YCR088W	ABP1	133.793	119.908	143.126	194.03	177.383	176.999	121.149	116.149	112.985	169.785	160.763	165.355
YCR089W	FIG2	11.2648	12.3709	13.7549	17.3925	16.2839	17.1167	13.953	12.5617	12.1308	14.6275	14.8968	12.7436
YCR090C	YCR090C	109.39	117.148	113.94	105.912	123.426	112.627	69.4231	90.7695	100.727	69.667	92.8833	76.7583
YCR091W	KIN82	8.17643	7.85369	9.30144	11.5299	18.3512	16.427	8.4338	7.90679	6.84539	28.1613	20.3699	34.6421
YCR092C	MSH3	15.5527	18.047	15.2815	19.6656	20.6339	22.5833	15.6686	16.3704	17.0616	15.8943	17.2913	15.1132
YCR093W	CDC39	27.3763	31.0685	28.4618	34.8848	32.8763	35.1281	33.8918	32.1289	28.8136	45.3166	36.4828	38.7748
YCR094W	CDC50	44.9458	52.5552	47.5279	52.2497	57.6923	59.1631	49.1957	50.6182	44.3634	51.1168	48.9068	47.2026
YCR095C	OCA4	40.0255	38.9679	41.0274	44.3461	47.8634	48.0764	36.0635	41.5201	41.1678	52.2598	45.1326	43.5034
YCR095W-A	YCR095W-A	0	0	46.5018	107.891	42.5209	0	0	0	84.8469	0	0	0
YCR096C	HMRA2	39.7804	37.299	48.2269	40.7763	45.2676	48.2829	29.4875	47.4352	37.0561	47.8279	65.9981	69.0308
YCR097W	HMRA1	248.557	213.641	249.288	285.809	320.647	296.607	168.744	214.708	233.366	402.16	377.019	397.122
YCR097W-A	YCR097W-A	0	0	0	0	0	0	0	0	0	1.63827	0	0
YCR098C	GIT1	3.35499	3.48021	2.33344	3.40946	4.54803	4.77334	4.79263	5.80091	3.92564	9.23496	8.96158	7.3912
YCR099C	YCR099C	9.14988	6.34575	9.89077	13.7966	16.9159	17.147	12.2751	13.222	17.0476	15.1904	7.52942	12.7069
YCR100C	YCR100C	10.2813	13.3112	10.6244	8.40626	12.9846	14.2884	9.93662	12.7498	11.7422	11.6908	9.48236	12.27
YCR101C	YCR101C	10.7597	9.62864	9.49498	10.0187	15.8331	11.4675	10.8595	10.8257	6.65594	11.6891	5.51782	3.83792
YCR102C	YCR102C	6.46745	4.74805	6.66509	3.02218	3.0434	4.02631	4.45528	5.81973	5.19632	5.85083	6.38146	6.42404
YCR102W-A	YCR102W-A	0	0	0	0	0	0	0	0	0	0	0	0
YCR104W	PAU3	2.7856	2.17217	5.77577	3.94476	4.27767	5.59533	0	0	2.32337	6.14526	1.37992	1.40111
YCR105W	ADH7	1.93028	1.58037	2.5649	2.94688	5.52479	4.26587	1.90521	2.98659	2.66588	3.95651	3.70432	5.00382
YCR106W	RDS1	11.4642	10.467	11.0358	12.848	9.98893	12.1031	11.8287	11.7449	9.51989	12.4206	11.4801	9.63759
YCR107W	AAD3	22.1545	26.7968	24.4448	18.9343	19.9091	21.5005	22.692	25.3309	21.6839	16.7234	20.6419	16.1766
YCR108C	YCR108C	0	0	0	0	0	0	0	0	0	0	0	0
YDL001W	RMD1	29.2031	33.8915	32.3877	30.7673	34.592	35.5454	27.1305	26.7221	30.7543	23.1707	23.8542	22.6768
YDL002C	NHP10	83.0287	77.9992	85.4472	89.4305	101.492	85.7066	65.356	85.1559	74.454	61.7991	58.7416	61.2557
YDL003W	MCD1	69.6129	72.7128	66.7562	41.5469	35.8756	39.327	61.2639	55.8446	62.1557	16.6475	15.2743	14.8769
YDL004W	ATP16	196.896	199.742	201.634	225.628	260.127	223.424	168.214	177.891	209.78	259.87	266.554	242.458
YDL005C	MED2	56.0312	59.6553	60.274	62.8234	63.5251	64.3393	54.0995	56.8032	54.0429	57.7514	50.1436	49.2839
YDL006W	PTC1	46.8273	41.0326	47.395	42.4256	44.3007	55.1629	44.136	42.9407	44.0849	41.8723	43.4832	47.6182
YDL007C-A	YDL007C-A	0	0	0	0	0	0	4.34563	0	0	0	5.82342	0
YDL007W	RPT2	309.897	280.242	294.307	461.803	531.806	492.453	248.925	282.483	291.685	456.355	457.261	442.075
YDL008W	APC11	94.667	97.8951	86.4155	97.2164	78.4699	76.1052	72.5653	87.8638	86.3353	65.2639	84.6945	72.2298
YDL009C	YDL009C	0	3.61149	0	2.21717	1.58008	0	0	0	0	0	0	0
YDL010W	GRX6	70.1135	70.7366	74.3909	63.2978	78.2015	78.6919	55.389	52.4025	58.2683	68.4418	62.3127	69.0272
YDL011C	YDL011C	0	0	0	0	0	0	0	0	0	0	0	0
YDL012C	YDL012C	321.53	258.221	312.221	266.061	232.272	184.421	196.463	167.6	199.572	167.551	269.65	183.23
YDL013W	SLX5	31.0124	32.3808	32.2564	39.5385	40.4334	41.6285	29.2105	31.1885	31.5003	34.4566	41.8173	37.7498
YDL014W	NOP1	638.42	674.892	611.142	356.542	276.898	331.733	710.501	643.048	642.501	114.433	179.892	59.082
YDL015C	TSC13	294.659	319.572	283.639	333.478	348.465	363.363	278.76	275.068	258.835	293.139	277.947	249.944
YDL016C	YDL016C	0	0	2.48306	0	4.09417	0	0	0	0	3.0065	0	3.21485
YDL017W	CDC7	19.0712	21.9487	19.7174	23.2045	25.1331	25.2789	18.3701	16.2038	19.5733	24.9799	23.0577	25.5942
YDL018C	ERP3	57.4403	64.8435	58.3459	69.4235	85.3076	78.2407	50.149	53.7171	51.6043	70.2059	75.8385	86.2209
YDL019C	OSH2	27.6282	25.2458	26.5689	29.1657	36.7094	34.4896	27.4761	26.527	22.942	43.228	34.9577	44.5048
YDL020C	RPN4	111.671	101.457	111.722	50.5038	81.1299	61.8249	128.643	162.36	158.697	322.668	308.005	379.934
YDL021W	GPM2	12.2925	8.75491	16.6542	91.942	127.454	117.072	2.97177	5.85383	4.91353	69.4534	64.9621	81.1336
YDL022C-A	YDL022C-A	0	0	0	0	14.0176	0	0	0	0	0	6.69514	7.38767
YDL022W	GPD1	250.866	188.323	267.03	397.818	500.216	501.306	201.272	235.121	234.174	563.796	563.259	683.486
YDL023C	YDL023C	1.56034	0	1.98946	0	1.63644	1.92802	0	0	0	2.41066	0	5.07317
YDL024C	DIA3	1.29557	1.1275	1.52613	9.39266	12.1106	11.6839	1.72108	2.51572	1.90639	14.6463	14.1181	19.3704
YDL025C	RTK1	29.2614	23.8387	33.7868	47.4655	53.809	56.6578	27.932	28.1742	27.8215	89.3558	73.6863	83.3549
YDL025W-A	YDL025W-A	0	0	0	0	0	0	0	0	0	0	0	0
YDL026W	YDL026W	0	0	0	0	0	4.28849	0	0	0	0	0	0
YDL027C	YDL027C	46.5397	42.8038	45.3442	67.2391	86.3295	80.2807	34.9304	38.5972	36.9146	104.544	90.7171	102.816
YDL028C	MPS1	22.4411	22.5234	24.0841	22.5258	21.4242	24.6585	23.4859	23.2913	23.5145	21.3602	18.626	19.8747
YDL029W	ARP2	293.179	270.874	273.702	325.26	337.097	339.649	203.822	219.447	204.298	268.199	250.025	264.171
YDL030W	PRP9	27.3665	24.657	26.8817	25.9534	22.5589	26.0572	26.0207	25.3002	25.4533	21.3314	21.848	20.1739
YDL031W	DBP10	62.0663	76.4869	66.5722	49.9413	33.062	44.1592	76.6847	71.4833	64.3004	21.2749	31.3387	16.1214
YDL032W	YDL032W	0	0	0	0	0	0	0	0	0	2.68678	0	0
YDL033C	SLM3	22.0274	20.8937	21.3218	31.6287	26.4363	30.4896	25.0778	22.1973	19.4858	24.1223	26.3612	25.7032
YDL034W	YDL034W	0	0	0	0	0	0	0	0	0	0	0	0
YDL035C	GPR1	30.6378	31.4228	31.3428	52.7477	56.5111	61.751	33.0259	32.1902	28.7603	58.849	50.3511	56.6258
YDL036C	PUS9	28.6129	30.4621	28.4867	34.7046	30.7025	34.8535	23.9826	25.0773	27.9838	19.8525	23.2728	16.8467
YDL037C	BSC1	6.04843	9.16945	8.12893	71.568	22.3189	47.1973	2.46499	4.18561	3.54586	11.4098	40.4885	5.55267
YDL039C	PRM7	10.071	11.0472	11.2154	93.5603	28.596	52.0795	3.47418	5.9223	3.67841	17.8256	47.3841	5.765
YDL040C	NAT1	96.7166	96.9023	91.9659	96.9669	86.3632	95.9507	94.0236	90.3708	79.7306	62.6373	66.3096	58.2948
YDL041W	YDL041W	1.11543	0	0	4.80501	3.45008	1.35769	0	0	0	0	0	0
YDL042C	SIR2	28.8237	28.073	31.2036	33.7874	24.9833	32.6871	31.1114	30.9624	31.512	21.0104	23.6522	17.8351
YDL043C	PRP11	45.4472	45.6472	38.0357	59.2186	54.4461	58.7767	35.9555	35.3032	36.4364	28.5995	33.5113	29.5244
YDL044C	MTF2	18.9414	19.2992	19.795	26.4079	30.3485	28.9662	18.4115	18.309	19.6269	20.127	24.6776	20.9628
YDL045C	FAD1	43.1924	45.9717	46.2954	70.0592	77.024	70.2991	34.7448	35.6148	41.7184	60.5552	58.5954	54.1438
YDL045W-A	MRP10	207.47	224.814	264.374	338.778	414.721	416.854	201.932	209.191	245.244	201.249	238.319	202.148
YDL046W	NPC2	352.372	304.777	292.833	410.351	403.776	417.924	257.317	272.536	296.224	444.49	419.338	430.71
YDL047W	SIT4	97.7478	87.7113	89.0562	94.2357	84.4119	94.7857	88.2147	87.4729	87.7155	84.1874	80.1434	85.8577
YDL048C	STP4	9.711	9.13919	9.03259	17.6324	22.0696	21.2566	15.3114	12.4253	13.0065	25.6781	31.5826	25.1849
YDL049C	KNH1	8.65507	6.27238	8.52531	16.2452	14.3291	16.2171	10.9354	10.2383	13.593	11.8501	13.4432	10.1168
YDL050C	YDL050C	0	0	0	0	0	0	0	0	0	0	0	0
YDL051W	LHP1	340.33	383.132	366.641	260.555	193.978	220.147	372.55	370.068	378.212	87.28	129.78	77.7083
YDL052C	SLC1	171.145	163.386	181.468	198.861	205.106	208.149	132.139	142.261	133.927	120.831	110.954	117.806
YDL053C	PBP4	111.107	100.864	111.878	134.183	145.907	145.683	102.374	104.245	109.073	140.3	160.95	145.396
YDL054C	MCH1	25.1006	24.3812	25.9181	42.4776	47.2926	49.9258	24.3686	22.9823	23.5486	62.8807	58.5364	54.4649
YDL055C	PSA1	2270.12	2374.57	2235.91	1742.28	1507.48	1645.87	2167.33	2043.26	2100.64	723.186	764.729	609.253
YDL056W	MBP1	28.3368	29.2046	29.4577	34.6982	32.8885	38.6581	29.7796	27.8564	26.6412	31.1481	30.9589	33.6856
YDL057W	YDL057W	16.0833	12.9274	17.2333	30.1152	32.9991	33.3426	12.18	13.797	12.1572	28.8601	31.6725	30.1926
YDL058W	USO1	16.8731	18.1686	19.5696	22.3548	19.9291	22.641	20.0353	18.5687	17.4102	20.3815	19.1765	17.4482
YDL059C	RAD59	15.5272	14.4353	14.5253	25.1715	28.1374	31.8171	13.9374	11.888	14.4814	29.148	38.7741	34.0583
YDL060W	TSR1	77.1691	88.7713	80.283	82.4884	47.3529	62.8293	84.5713	75.8318	73.6453	16.9914	25.3473	8.87094
YDL061C	RPS29B	10644	9916.36	9523.84	4119.46	3866.86	4282.63	8660.07	8906.79	9204.57	883.543	1358.89	657.784
YDL062W	YDL062W	0	0	0	0	1.30508	0.759626	0	0	0	2.70834	0.901235	0.922145
YDL063C	YDL063C	53.7229	72.5846	52.4527	64.4904	27.7605	43.5501	67.3845	59.3032	53.8336	14.9171	24.0157	6.40019
YDL064W	UBC9	211.111	207.391	214.528	192.245	190.902	210.201	153.005	189.668	208.232	152.169	187.091	156.981
YDL065C	PEX19	94.5822	93.8796	97.2592	114.945	128.341	120.332	74.7516	80.1274	85.188	81.7196	73.9509	76.3577
YDL066W	IDP1	100.499	112.702	104.124	183.611	167.622	174.078	102.849	97.9923	87.0045	128.392	123.399	132.302
YDL067C	COX9	343.31	650.724	531.008	363.38	430.469	409.269	449.221	449.648	531.865	637.863	778.399	603.623
YDL068W	YDL068W	0	0	1.79523	2.06857	0	0	0	0	3.56033	0	2.22282	2.27
YDL069C	CBS1	25.9951	33.6757	25.0701	34.2866	32.1164	30.5162	19.1586	22.949	25.3378	27.6244	37.1625	28.7716
YDL070W	BDF2	178.238	179.389	181.79	148.895	160.043	155.332	167.015	171.409	175.542	152.462	144.457	132.821
YDL071C	YDL071C	0.928532	1.08609	2.31031	0	0	0	1.05085	0	1.16169	1.36561	0	0
YDL072C	YET3	297.898	260.537	257.562	468.263	545.52	545.885	201.697	194.45	215.539	435.944	372.152	432.235
YDL073W	YDL073W	35.8983	39.0517	33.8685	39.2626	35.279	41.1232	37.724	39.6795	35.023	34.4809	31.1351	29.9084
YDL074C	BRE1	62.0625	72.888	69.8333	66.4325	59.2019	61.241	68.1815	68.5867	67.7611	52.8526	51.0531	45.9664
YDL075W	RPL31A	8440.05	9247.14	8688.74	4196.27	3379.73	3424.47	6989.22	7165.65	7645.35	439.024	827.328	485.293
YDL076C	RXT3	62.0433	58.7676	58.5812	74.095	72.1674	75.1189	43.4604	50.1151	51.7003	53.9535	59.9483	50.9599
YDL077C	VAM6	15.5181	18.6739	15.9811	23.9442	26.1302	27.4874	16.9305	14.7419	14.2216	23.0622	19.6104	19.1311
YDL078C	MDH3	180.204	169.631	168.222	212.903	225.46	205.338	148.356	146.999	157.896	191.362	202.815	196.543
YDL079C	MRK1	2.303	3.53946	3.73981	5.88704	7.81645	7.06772	2.66308	3.11094	3.31012	5.33771	3.70028	6.51884
YDL080C	THI3	25.3269	22.7116	25.1238	32.8563	29.101	29.6939	19.1623	19.5829	20.2517	22.1465	23.5755	21.0939
YDL081C	RPP1A	4144.92	4089.07	3690.71	1193.87	1572.61	1391.71	4002.58	3600.86	4583.74	339.902	497.28	286.634
YDL082W	RPL13A	1649.07	1798.35	1611.84	1041.24	936.678	946.873	1655.3	1506.4	1721.51	159.203	258.286	134.59
YDL083C	RPS16B	5636.65	5825.96	5638.39	3051.31	2783.15	2692.28	4860.43	5228.89	5570.91	339.811	589.762	295.368
YDL084W	SUB2	603.286	646.135	596.415	437.542	410.007	423.98	573.412	574.212	567.649	257.88	260.962	245.94
YDL085C-A	YDL085C-A	296.394	319.558	212.013	288.94	243.35	384.667	167.402	359.083	231.59	137.002	154.754	148.835
YDL085W	NDE2	0.932252	0.856842	2.53129	16.938	17.7484	19.2052	0.976105	1.28293	1.49416	29.1997	26.4967	37.9213
YDL086C-A	YDL086C-A	4.87697	4.88534	4.47621	5.86132	8.63699	7.88357	2.70013	5.10144	5.312	0.84823	3.3813	1.7329
YDL086W	YDL086W	166.009	131.699	168.031	245.563	258.465	236.395	125.262	125.288	131.065	187.648	222.938	223.472
YDL087C	LUC7	25.119	22.9823	20.9533	31.3775	35.2053	28.4587	22.9962	23.7384	18.1687	36.1494	35.7237	33.1381
YDL088C	ASM4	59.9754	55.5318	55.7648	68.2288	74.5788	69.0439	56.9248	57.7512	51.9621	63.0434	54.1541	56.4543
YDL089W	NUR1	27.5069	32.5251	32.7833	42.3786	44.9803	50.8206	25.5072	28.4814	25.9037	48.2775	42.6102	47.2364
YDL090C	RAM1	32.182	33.2693	38.3887	36.4425	36.4906	40.6076	26.1447	29.1133	28.6662	39.733	39.3184	39.7142
YDL091C	UBX3	25.9431	25.9917	26.7727	40.9917	41.371	42.1929	22.5249	25.5656	24.9037	46.5193	41.038	49.6386
YDL092W	SRP14	322.406	335.611	343.104	341.909	352.313	332.784	307.373	324.315	340.139	256.721	271.793	266.421
YDL093W	PMT5	24.4623	29.8134	28.0298	25.9257	21.6694	25.8683	25.0813	26.9134	24.7016	20.3798	19.7544	20.3383
YDL094C	YDL094C	0	0	0	0	1.26137	0.96257	0.45509	0.489204	1.03663	0.554604	0.547149	1.13615
YDL095W	PMT1	119.889	129.434	132.843	126.742	109.838	121.979	130.556	112.573	101.232	103.816	94.335	90.6519
YDL096C	OPI6	0	0	1.85669	0	0	0	0	0	0	0	0	0
YDL097C	RPN6	256.698	251.707	262.956	414.053	438.575	408.154	228.162	251.073	255.002	443.525	452.33	415.443
YDL098C	SNU23	39.288	45.5255	36.8655	51.1134	55.8708	59.0016	33.7649	44.2665	42.2813	43.6542	60.0533	52.8173
YDL099W	BUG1	143.859	145.33	155.259	200.801	231.437	212.088	119.988	134.775	131.056	145.072	156.188	137.093
YDL100C	GET3	373.183	342.926	367.896	496.42	532.424	492.872	329.116	359.265	336.069	436.812	438.402	429.229
YDL101C	DUN1	34.5649	31.0813	31.0599	21.4577	31.1408	30.89	28.5339	28.1433	26.0092	29.7065	23.2601	33.2469
YDL102W	POL3	18.31	20.7371	20.1873	20.1674	13.9373	18.3223	21.0767	16.8065	18.2541	16.0517	14.9539	13.9561
YDL103C	QRI1	65.7975	67.3114	69.0661	92.3559	84.9712	88.8067	59.261	61.4092	64.4382	78.1528	70.1767	79.9417
YDL104C	QRI7	11.9552	10.8936	12.3993	15.8601	17.6375	17.7227	10.8291	11.1078	11.5067	17.0629	19.9649	13.7981
YDL105W	NSE4	19.5828	19.8589	19.642	18.2683	18.8601	16.9729	19.0393	15.1696	22.6142	13.4208	17.5911	13.764
YDL106C	PHO2	33.0086	32.3339	33.3894	33.3403	38.1515	38.242	34.9535	31.1045	32.1409	36.8006	31.4201	36.162
YDL107W	MSS2	22.8025	20.3883	21.1692	36.2651	42.6639	42.2519	18.4765	20.5958	17.5368	26.5153	26.5263	28.3784
YDL108W	KIN28	53.9526	47.7973	54.9085	66.928	69.6236	74.3354	42.5905	56.5042	50.0993	52.9394	63.4783	50.5918
YDL109C	YDL109C	10.5387	11.6861	10.6666	19.1752	17.8	17.9609	11.9363	10.1951	11.1893	16.7647	13.8178	13.9077
YDL110C	TMA17	86.9212	67.6787	95.5899	270.146	329.451	279.957	60.005	74.8244	82.0758	421.302	490.588	543.158
YDL111C	RRP42	107.341	116.126	120.557	141.992	125.97	153.346	90.6161	111.106	105.333	106.044	136.179	97.7315
YDL112W	TRM3	29.1541	37.7667	30.9991	26.4281	17.096	22.4526	34.1182	33.2727	31.6785	10.8767	13.5254	7.35975
YDL113C	ATG20	22.8582	24.637	25.8932	32.1935	39.5309	39.3076	22.1953	23.8296	22.1562	58.0935	46.9327	62.6613
YDL114W	YDL114W	0.150153	0.164407	0.355527	0.969254	1.64589	1.16617	0.158611	0.169613	0.73806	0.367924	0.358192	0.950792
YDL114W-A	YDL114W-A	0	0	0	0	0	0	0	0	0	0	0	0
YDL115C	IWR1	55.8245	55.532	58.1699	82.521	92.1004	88.108	40.1367	51.2296	52.9699	96.3015	99.0368	101.826
YDL116W	NUP84	45.7242	48.5636	44.8614	48.9432	46.9456	48.9803	47.4442	44.0167	42.6924	44.217	39.8156	41.337
YDL117W	CYK3	40.8271	40.7473	38.3857	50.4284	45.0176	49.9553	37.511	36.8868	34.9058	60.438	54.6477	45.6438
YDL118W	YDL118W	0	0	0	0	0	1.06311	0	0	0	0	0	0
YDL119C	YDL119C	30.3208	22.9602	33.5764	40.7067	57.4236	46.7	17.3702	24.8806	29.66	44.1798	40.6729	42.2274
YDL120W	YFH1	126.007	129.746	136.13	131.374	158.756	140.257	100.987	110.254	113.448	103.535	109.147	118.326
YDL121C	YDL121C	219.239	231.441	223.811	111.503	98.3075	104.339	169.587	195.184	203.079	39.2321	64.23	33.0125
YDL122W	UBP1	65.006	75.2596	70.2075	81.0732	69.6456	85.3217	73.7511	71.3267	66.5577	53.666	56.9697	43.042
YDL123W	SNA4	60.3794	52.7891	66.8414	66.1443	60.9821	65.6143	51.059	71.7356	59.6907	79.3204	91.2093	92.3295
YDL124W	YDL124W	414.651	325.992	432.9	771.659	897.052	871.896	219.365	284.014	284.23	808.454	759.146	875.575
YDL125C	HNT1	600.971	544.671	553.768	632.385	588.012	643.783	507.886	538.764	559.932	682.989	668.582	729.429
YDL126C	CDC48	339.317	327.237	359.018	556.439	545.231	547.177	349.3	373.74	336.658	698.594	641.153	672.208
YDL127W	PCL2	36.3371	43.5679	42.841	80.545	70.4554	86.9071	38.0667	40.1984	44.0991	38.2641	45.4306	40.1234
YDL128W	VCX1	129.862	118.536	122.549	124.357	113.508	130.523	121.675	102.987	105.257	114.213	98.6527	99.1406
YDL129W	YDL129W	23.1372	27.5104	27.9342	18.1236	9.42113	11.0471	20.5115	23.2297	23.236	8.6162	11.7113	7.45312
YDL130W	RPP1B	4939.73	4548.98	4476.28	1594.38	1946.27	1675.45	4034.37	3475.75	5109.14	250.708	467.592	177.561
YDL130W-A	STF1	82.0961	79.4165	141.257	747.834	365.445	602.396	66.2751	64.9578	26.1772	597.973	639.997	760.999
YDL131W	LYS21	152.465	160.057	155.922	187.504	163.545	181.21	160.154	160.156	166.571	87.1231	99.6202	85.2294
YDL132W	CDC53	59.1697	59.8523	63.6586	95.0923	101.108	93.9264	60.3989	60.3125	55.2427	104.173	91.6481	95.2288
YDL133C-A	RPL41B	0	0	0	0	0	0	0	0	0	0	0	0
YDL133W	YDL133W	46.9646	48.056	48.7553	52.0749	58.885	62.5518	48.8036	45.4885	48.3689	49.5748	50.2008	49.9354
YDL134C	PPH21	139.135	136.105	136.806	172.01	172.846	170.557	132.554	135.627	142.31	135.442	140.857	139.039
YDL135C	RDI1	160.502	193.382	157.866	241.371	271.494	257.151	143.294	158.373	174.039	149.061	183.507	182.463
YDL136W	RPL35B	7364.01	7405.96	8021.64	4180.89	4449.58	3826.26	7018.27	7429.78	7944.96	427.715	702.619	459.479
YDL137W	ARF2	783.226	709.223	783.323	840.034	919.178	888.185	538.123	628.45	690.34	717.531	742.417	772.907
YDL138W	RGT2	16.8947	14.2638	16.7817	24.9019	23.1158	25.2254	14.863	14.5249	12.9315	28.091	24.686	21.6978
YDL139C	SCM3	18.2845	23.2263	22.9923	31.0527	30.8747	27.5089	17.1533	22.3327	24.6742	14.6442	22.8526	20.2191
YDL140C	RPO21	66.7112	68.7183	71.5721	81.2047	78.5532	83.5994	81.3621	83.9478	72.23	84.5986	80.9447	74.6155
YDL141W	BPL1	35.6217	36.7688	37.0987	39.9352	36.6014	37.8449	35.4076	32.6775	30.9861	32.5085	31.5168	32.5064
YDL142C	CRD1	25.4608	25.0472	30.5916	33.1822	39.7739	37.5785	22.4622	23.2597	29.4294	43.296	38.9271	44.939
YDL143W	CCT4	229.297	231.922	221.13	281.987	253.706	256.767	217.204	219.838	207.392	221.009	226.473	200.629
YDL144C	YDL144C	54.3313	38.9229	48.501	84.889	109.165	80.6793	38.8341	44.2751	56.2908	71.7143	81.8875	83.4763
YDL145C	COP1	134.816	139.014	131.991	122.119	111.258	120.647	140.722	131.959	119.924	100.316	92.0353	94.4019
YDL146W	LDB17	26.2111	25.2243	23.0997	31.8453	38.9296	39.4533	22.6958	19.9578	19.0616	29.6204	25.7136	30.8942
YDL147W	RPN5	232.804	240.034	230.305	349.065	377.363	376.636	216.303	238.118	216.952	473.377	433.304	436.261
YDL148C	NOP14	68.4918	85.9678	74.0959	64.0307	42.7991	53.27	79.5591	75.9686	69.6247	16.7335	27.2714	8.54047
YDL149W	ATG9	10.13	7.93109	8.51383	15.2868	21.7905	21.1478	7.04272	7.83612	7.07983	28.1045	22.8121	27.3983
YDL150W	RPC53	75.6594	78.7622	72.967	86.1183	66.165	73.1591	78.0095	73.7409	74.7088	24.6971	39.4432	20.9029
YDL151C	BUD30	0.31995	0	0.767762	0	0	0	0.344527	0.369582	0.395377	0	0	0
YDL152W	YDL152W	1.00179	2.35252	0	2.85364	1.02841	2.4249	0	0	1.25451	0	0	0
YDL153C	SAS10	101.3	119.532	104.43	75.7424	52.4801	70.5492	111.142	106.271	93.0828	17.6824	29.6476	10.7982
YDL154W	MSH5	9.60326	12.0077	10.7526	10.419	12.9268	12.5151	8.59419	10.2019	8.21557	8.63175	8.8255	9.15438
YDL155W	CLB3	54.7605	58.0512	61.7024	46.8175	50.5213	52.093	62.1802	55.1239	56.829	44.1949	43.7198	41.0467
YDL156W	YDL156W	15.2594	20.4396	19.56	14.6678	15.0189	16.0937	18.9909	16.986	17.4083	9.96244	14.413	14.4548
YDL157C	YDL157C	268.024	220.011	206.602	172.282	156.448	179.373	180.812	234.954	240.764	79.6168	108.086	88.8031
YDL158C	YDL158C	17.9106	15.0921	4.60114	7.99025	15.1587	6.67181	8.40305	6.94887	18.0862	2.78816	14.3516	2.96411
YDL159C-B	YDL159C-B	0	0	0	0	0	0	0	0	0	0	0	0
YDL159W	STE7	30.1015	26.9555	34.8442	31.1991	35.5547	37.6166	26.065	25.2598	27.957	40.4306	41.5583	39.8952
YDL159W-A	YDL159W-A	0	0	0	0	0	0	0	0	0	0	0	0
YDL160C	DHH1	40.6404	55.8578	49.1976	57.2002	52.4157	59.6451	51.7917	44.6909	42.6076	54.9313	45.1332	43.1196
YDL160C-A	YDL160C-A	104.904	95.0388	160.363	136.143	123.838	45.9861	72.5851	107.125	102.232	92.6063	36.8514	106.646
YDL161W	ENT1	89.0776	84.6349	97.0299	109.31	108.933	106.895	77.8803	80.6306	79.9233	107.664	99.8979	91.3913
YDL162C	YDL162C	2.17023	0	1.35923	0	0	0	0	0	0	1.62483	0	0
YDL163W	YDL163W	0	0	0	0	0	0	0	0	0	3.0065	0	0
YDL164C	CDC9	41.937	40.906	39.5255	33.5639	29.8949	35.1327	40.6497	43.7207	38.2424	31.4382	29.0024	29.2532
YDL165W	CDC36	116.51	108.069	114.787	127.049	143.592	140.26	91.7876	110.549	106.491	100.301	119.575	97.3942
YDL166C	FAP7	116.369	132.925	138.753	106.112	87.1105	103.344	110.574	120.006	129.297	40.3262	53.9023	37.3829
YDL167C	NRP1	51.9357	62.1436	52.488	62.4272	39.4725	53.1048	58.1024	52.6616	51.8033	19.6275	26.6254	11.8434
YDL168W	SFA1	95.6124	87.9511	93.8162	142.254	130.864	131.149	94.857	95.6587	89.0185	179.568	176.297	178.679
YDL169C	UGX2	9.63643	7.37778	10.6118	34.2874	56.3154	50.5719	8.70861	13.2866	15.5356	78.5178	77.699	77.3459
YDL170W	UGA3	21.457	20.1566	19.2897	32.8298	35.1046	39.3485	19.5862	18.417	17.4425	46.7914	51.2082	36.0012
YDL171C	GLT1	30.4157	36.5564	33.024	32.9706	29.5457	30.9564	33.6098	30.9774	26.2296	21.4173	20.0618	21.3006
YDL172C	YDL172C	1.43701	2.16857	0.58138	1.29524	1.44764	0.555295	2.62167	2.25762	0.594555	0.645733	0.639143	0.660526
YDL173W	PAR32	143.764	120.625	145.536	193.032	214.637	193.081	136.655	136.764	143.732	186.313	192.676	168.322
YDL174C	DLD1	58.9405	52.2266	55.2681	122.932	132.279	140.722	50.2021	53.7885	53.3237	75.4859	74.0934	71.9671
YDL175C	AIR2	31.9324	27.4316	32.262	32.1507	39.6196	32.1623	25.1016	30.3861	29.725	32.1372	29.1226	33.0827
YDL176W	YDL176W	15.9325	18.0165	17.1689	20.3545	21.0672	22.0625	16.2056	16.9472	15.0562	16.7153	17.2398	14.7297
YDL177C	YDL177C	44.188	57.5932	40.2478	61.9897	72.2264	59.3644	36.3791	33.7914	49.1253	49.2139	59.0553	48.0353
YDL178W	DLD2	66.4632	68.1289	62.3168	76.1552	80.9467	82.8945	55.0708	65.5316	68.4511	61.2166	68.1311	58.2187
YDL179W	PCL9	55.2249	51.6886	58.5106	47.6159	46.3462	62.1449	45.4226	47.02	50.5729	51.959	45.4771	44.3976
YDL180W	YDL180W	30.3437	29.7793	29.3174	35.64	41.7275	38.9455	34.9096	36.0025	32.9019	67.5426	66.276	64.6036
YDL181W	INH1	78.8011	83.2098	95.6671	283.602	340.162	270.452	91.2583	131.583	173.724	421.672	518.285	583.798
YDL182W	LYS20	346.93	318.899	329.689	274.426	225.499	254.697	272.629	275.838	248.093	126.43	178.72	126.91
YDL183C	YDL183C	13.0892	13.3863	12.1198	26.4199	22.1111	27.1211	14.3772	16.2152	17.129	17.2167	18.7863	18.341
YDL184C	RPL41A	0	0	0	0	0	0	0	0	0	0	0	0
YDL185C-A	YDL185C-A	0	0	0	0	0	0	0	0	0	0	0	0
YDL185W	VMA1	231.485	262.074	248.538	327.53	303.614	331.883	253.173	247.437	222.986	289.649	271.835	272.351
YDL186W	YDL186W	0.350448	0.192351	0	0.227029	0.174751	0.195087	0.18562	0	0.64651	1.08134	0.843146	0
YDL187C	YDL187C	1.4151	0	1.79523	2.06857	1.47587	3.48336	1.63859	0	1.78016	0	2.22282	2.27
YDL188C	PPH22	89.6467	88.8907	91.7926	84.7643	91.3336	101.229	88.9381	94.5346	79.5566	101.381	97.8919	95.1655
YDL189W	RBS1	77.8039	79.8682	78.5917	74.4695	72.8648	76.4468	79.2417	80.111	74.9559	60.9283	65.395	55.5727
YDL190C	UFD2	35.6506	35.1077	35.3945	49.7493	48.6835	52.7193	38.9404	34.6388	33.7522	53.492	47.0667	50.0885
YDL191W	RPL35A	2206.26	1532.45	1658.49	1121.72	1159.37	1100.17	1420.57	1401.62	2526.83	573.518	908.769	558.202
YDL192W	ARF1	1516.19	1656.42	1472.25	1007.77	1009.06	968.128	1326.32	1396.32	1491.06	679.509	766.316	699.221
YDL193W	NUS1	54.5687	60.6528	64.3143	88.3917	87.4423	89.1442	45.3698	47.9709	46.7345	70.4708	71.3261	82.039
YDL194W	SNF3	7.96229	8.66643	8.09346	9.70455	12.7154	11.0804	9.63587	9.7819	8.44225	10.5244	7.12887	10.4649
YDL195W	SEC31	80.3914	85.8029	87.6783	86.7792	85.6681	89.1492	107.374	102.142	87.0309	155.462	136.681	149.185
YDL196W	YDL196W	0	1.68835	0	0	2.95175	0	0	0	1.78016	4.34285	0	4.53999
YDL197C	ASF2	36.2342	32.5242	37.5235	31.9094	40.9411	34.0218	33.0023	39.525	38.1614	66.1642	67.8715	72.3701
YDL198C	GGC1	87.1538	83.185	85.6834	64.262	66.197	64.3429	77.5382	84.2469	87.8605	46.4952	42.2958	37.7688
YDL199C	YDL199C	7.85112	5.33005	6.67431	11.7562	16.9823	14.8918	6.84915	6.31679	5.08448	19.7871	15.713	24.0992
YDL200C	MGT1	42.731	56.704	48.5047	78.078	95.1267	101.897	26.4967	37.0019	45.3435	60.1382	66.7787	63.0907
YDL201W	TRM8	126.791	132.988	126.994	119.344	84.2305	97.3591	135.487	128.846	125.14	29.8377	44.7086	27.2101
YDL202W	MRPL11	87.2827	76.8054	91.0325	94.7958	102.173	98.4062	69.9756	78.4262	89.3373	70.429	73.0073	64.4336
YDL203C	ACK1	23.4362	28.2847	28.4876	32.0617	32.1636	32.8489	27.7734	29.1755	26.7646	30.4667	26.2157	24.444
YDL204W	RTN2	22.3239	15.2846	22.1417	111.961	162.589	154.645	17.9136	19.6266	18.9242	285.028	212.64	304.524
YDL205C	HEM3	81.034	76.1622	71.8415	74.9022	67.2076	62.998	76.38	72.864	70.4564	37.7511	45.4239	37.1223
YDL206W	YDL206W	17.4535	15.9279	17.4335	23.5812	31.1723	29.4561	14.0325	16.2771	13.9014	30.3553	27.4643	34.5414
YDL207W	GLE1	58.1228	60.9258	60.5086	53.9437	58.5703	60.7664	58.3476	55.2243	56.8665	65.2672	57.9076	60.1412
YDL208W	NHP2	922.753	932.348	910.417	473.124	431.821	438.59	813.332	823.282	898.478	122.855	203.801	118.682
YDL209C	CWC2	31.5262	34.0221	30.7202	34.5032	32.7046	34.0153	26.7235	31.6762	35.1673	26.3554	26.1557	25.6609
YDL210W	UGA4	2.23821	2.50388	2.55291	2.76949	3.90958	4.83626	2.62641	2.80456	3.15844	3.89453	3.93529	3.95314
YDL211C	YDL211C	20.7486	21.6272	24.0872	9.6798	12.5763	13.44	21.223	20.4654	19.3497	8.99845	9.43048	9.16726
YDL212W	SHR3	377.233	417.278	383.041	310.578	302.18	272.022	354.498	349.405	390.551	161.021	180.882	169.28
YDL213C	NOP6	238.28	258.97	255.154	117.192	97.5523	105.233	194.23	217.93	229.819	47.5193	51.2584	29.6878
YDL214C	PRR2	1.92737	2.78625	2.32743	3.47713	5.53107	4.74796	2.46146	2.80694	2.68868	6.37842	5.07057	7.54154
YDL215C	GDH2	37.1607	34.0141	38.9179	59.2786	63.298	65.2732	32.7904	34.7943	34.6613	74.9134	69.1988	74.701
YDL216C	RRI1	11.5701	11.6811	13.5266	15.6536	19.3043	13.9695	11.9479	12.2409	11.9878	15.1795	12.6664	17.1196
YDL217C	TIM22	71.1587	63.9883	82.7653	76.5939	64.7383	72.4593	65.1365	64.6486	68.7331	57.6914	69.6747	49.0282
YDL218W	YDL218W	6.48743	4.73262	6.14137	11.9015	12.3523	11.5069	4.56548	5.69525	5.66786	7.05262	8.06546	7.47401
YDL219W	DTD1	132.582	139.744	134.832	110.309	123.336	122.14	109.706	128.084	124.482	91.3576	72.7631	76.3817
YDL220C	CDC13	8.40029	8.20616	8.84983	9.98062	10.94	9.69138	9.17096	7.3085	7.84484	10.245	9.02775	8.46611
YDL221W	YDL221W	0	0.396677	0	0.943276	0	0	0	0.411643	0	0.461957	1.36263	1.42213
YDL222C	FMP45	6.87533	2.94553	5.48506	172.682	211.936	207.848	5.05185	7.59685	6.06088	268.395	265.565	319.834
YDL223C	HBT1	11.0413	9.36639	10.5144	49.6842	54.8741	67.1306	12.0095	14.6747	11.1378	87.1211	62.8706	87.6895
YDL224C	WHI4	51.2209	57.0805	54.2896	59.3621	63.8003	64.5534	59.2831	57.4333	52.8511	71.6748	68.4314	62.7719
YDL225W	SHS1	74.6683	72.2584	75.1919	86.0131	83.2664	87.2626	65.8724	72.7705	64.7093	63.2991	65.0282	65.3489
YDL226C	GCS1	190.613	168.833	195.093	161.512	165.773	148.478	162.749	175.225	165.805	122.032	146.123	127.825
YDL227C	HO	94.0482	97.6689	92.7003	5.45336	4.31365	6.13084	67.1642	73.04	71.9676	1.96573	1.29655	2.52702
YDL228C	YDL228C	0	0.44449	0	0	0	0	0	0	0.329874	0	0.332088	0
YDL229W	SSB1	1894.37	2065.1	1910.49	924.189	626.796	720.781	2091.28	1921.32	1719.03	169.34	266.201	110.653
YDL230W	PTP1	33.5124	29.4802	31.7297	40.9271	54.0543	52.0238	23.2272	31.3023	26.4005	54.5323	59.7014	59.0962
YDL231C	BRE4	34.6367	37.0786	34.8336	33.1241	29.2433	30.9546	34.6432	37.215	33.9388	33.5735	30.2082	26.8021
YDL232W	OST4	1642.99	4967.6	5768.65	2713.79	2266.2	6103.86	5994.73	0	4192.6	2308.52	1118.76	4436.65
YDL233W	YDL233W	13.4865	13.5161	16.0985	21.8022	27.7955	26.746	14.4271	18.9907	15.0155	26.3747	25.193	24.8882
YDL234C	GYP7	25.9901	23.5363	27.3609	42.8203	50.5437	46.5493	24.6024	26.8724	26.2923	59.5837	52.3374	58.2779
YDL235C	YPD1	132.396	164.366	152.354	182.153	187.315	202.758	115.938	149.29	149.495	150.697	152.703	156.068
YDL236W	PHO13	183.774	180.232	200.505	149.357	154.246	158.118	159.269	161.901	165.937	113.975	122.981	95.5292
YDL237W	AIM6	84.3649	82.1876	77.7669	118.696	116.314	124.773	67.9163	71.6569	65.0979	131.464	112.056	109.881
YDL238C	GUD1	8.59008	6.58267	10.0188	18.2002	25.7857	23.109	5.57412	8.51829	6.82057	22.5998	22.2222	25.6568
YDL239C	ADY3	9.26638	10.3929	11.0819	15.8173	21.9668	19.1001	8.94572	9.44519	7.29894	19.5997	17.1979	22.5726
YDL240C-A	YDL240C-A	0	0	0	0	0	0	0	0	0	0	0	0
YDL240W	LRG1	27.0973	25.1981	24.2459	15.6245	16.0504	18.1554	26.0206	24.3671	23.2754	14.4884	15.0506	14.1354
YDL241W	YDL241W	30.4617	31.2159	45.0498	10.8047	4.87699	16.0841	29.1268	31.676	26.209	2.8085	7.10062	4.32512
YDL242W	YDL242W	0	0	0	1.60167	1.15003	1.35769	0	0	0	3.35022	3.40542	1.72932
YDL243C	AAD4	16.4263	15.6413	21.7738	23.5479	21.4065	28.3486	15.1599	15.8218	14.4598	25.5597	26.2504	28.7654
YDL244W	THI13	1.63538	1.64413	1.54652	3.36881	2.38865	4.34309	1.65479	1.76897	2.14222	3.50647	3.1007	4.50634
YDL245C	HXT15	0.102592	0.0371335	0	0.523689	0.203924	0.187589	0.0715856	0	0.0838173	0.245495	0.158765	0.0424145
YDL246C	SOR2	5.14327	3.67689	5.20779	6.14151	6.88846	6.22607	6.06079	7.16719	7.66751	6.92024	6.58418	8.62319
YDL247W	MPH2	1.75968	2.1825	1.44092	1.68288	2.24815	2.6984	1.47908	1.64945	1.65556	2.32726	1.6018	3.03566
YDL247W-A	YDL247W-A	0	0	0	0	0	0	0	0	0	0	0	0
YDL248W	COS7	30.3154	28.5393	31.1577	30.1563	41.2262	40.7888	30.0205	33.9156	29.5845	48.1974	40.1664	48.4945
YDR001C	NTH1	57.1345	53.1812	61.7296	234.467	285.779	279.836	52.2293	57.7702	57.6012	338.244	297.224	359.951
YDR002W	YRB1	865.885	875.092	850.095	698.531	669.461	702.019	701.071	810.976	820.08	534.958	620.943	543.788
YDR003W	RCR2	82.1542	69.6223	81.4481	92.9572	113.283	113.265	64.6144	71.927	80.8504	159.976	173.373	200.482
YDR003W-A	YDR003W-A	428.898	0	0	354.066	582.238	533.722	0	637.015	0	607.158	1783.71	780.459
YDR004W	RAD57	41.7402	37.6379	36.9076	48.3339	56.254	55.2368	36.5645	41.2338	41.4196	47.9961	51.0324	55.1837
YDR005C	MAF1	56.7814	52.7897	54.8602	57.8746	66.3114	73.379	46.3625	48.9794	51.0731	58.0702	55.6708	59.8822
YDR006C	SOK1	33.4507	36.9803	34.9461	59.909	59.1683	71.2703	39.9944	37.3025	32.8459	70.4131	74.5315	55.1242
YDR007W	TRP1	114.275	100.864	109.544	142.498	137.513	137.299	101.599	104.624	99.7605	164.109	179.814	166.822
YDR008C	YDR008C	1.14714	2.7117	4.32172	0	2.36828	1.39826	0	0	1.43902	3.4554	0	1.78578
YDR009W	GAL3	3.26344	2.30923	4.77897	7.56239	9.3553	9.75172	3.97506	5.43396	3.90728	10.3739	10.4199	13.5804
YDR010C	YDR010C	0	0	0	0	0	0	0	0	0	2.09891	0	0
YDR011W	SNQ2	101.238	94.3055	116.988	71.7568	78.8216	93.8775	96.6195	97.7449	85.5528	122.282	123.009	120.785
YDR012W	RPL4B	1583.35	1616.24	1572.33	977.339	844.965	865.12	1724.65	1549.05	1560.73	190.938	300.032	161.174
YDR013W	PSF1	64.1355	67.7558	66.6998	56.4751	61.1091	56.0657	62.4687	60.8706	57.1265	41.1805	52.5035	49.673
YDR014W	RAD61	10.1874	9.84425	10.9419	15.1462	14.8333	15.0743	10.5896	9.21481	8.24854	13.9008	11.6108	12.1692
YDR014W-A	HED1	1.83623	4.14875	1.11283	16.0951	23.569	21.2367	1.00308	1.61888	1.13903	19.6985	23.1285	23.9373
YDR015C	YDR015C	0	0	0	0	0	0	0	0	0	0	0	0
YDR016C	DAD1	157.712	170.879	161.679	150.982	191.574	139.688	101.207	105.984	190.803	133.383	98.5391	103.906
YDR017C	KCS1	33.7832	40.4667	35.5515	34.909	29.9839	32.6835	39.4513	37.647	35.6	24.0699	24.8734	21.3642
YDR018C	YDR018C	2.24244	2.21167	3.40166	9.45378	10.3602	11.7769	1.57146	2.15896	2.35853	13.0474	11.1716	16.7172
YDR019C	GCV1	82.9492	89.7206	81.1949	384.265	401.47	412.342	77.3213	83.2116	79.3411	724.137	641.966	707.315
YDR020C	DAS2	32.3791	28.5994	34.1705	22.354	16.4064	17.9066	36.7388	27.9897	36.4774	13.3521	8.50928	8.0772
YDR021W	FAL1	30.1012	35.499	29.5031	32.0147	21.5699	27.8684	29.5632	35.1519	29.7121	10.4865	16.2776	7.1495
YDR022C	CIS1	39.4707	30.4447	38.7535	80.0694	82.1906	93.4414	17.7193	28.6859	24.1889	85.8876	89.7424	93.1906
YDR023W	SES1	509.429	577.96	522.481	374.788	323.841	348.341	552.782	536.72	474.2	126.877	140.431	112.435
YDR024W	FYV1	0	0	0	0	0.468752	0	0.508925	0.547652	0	0	0	0
YDR025W	RPS11A	5214.21	5332.1	5203.81	3242.29	2816.11	2849.55	5070.17	5136.35	5125.26	444.587	668.574	373.398
YDR026C	YDR026C	33.5754	33.978	37.8145	40.8494	41.3392	43.5435	36.9183	35.6056	30.4844	28.6207	33.0087	31.9452
YDR027C	VPS54	28.4275	27.4697	31.0931	28.4117	34.8289	33.0761	26.2573	26.5263	24.1191	34.2294	27.8183	34.4613
YDR028C	REG1	54.8469	56.4754	58.8163	80.0239	81.9311	85.9133	60.631	53.2883	50.0474	84.4998	71.9379	76.3735
YDR029W	YDR029W	0	0	0	0	1.75859	0	0	0	0	0	0	0
YDR030C	RAD28	8.31637	9.21015	9.51318	17.2453	11.4269	17.7556	8.87857	7.98992	8.36763	16.004	17.7244	14.8285
YDR031W	MIC14	65.1161	48.2266	50.9531	102.731	135.493	138.22	53.5047	69.3982	58.962	154.619	173.195	188.032
YDR032C	PST2	357.072	304.674	373.527	1130.26	1156.33	1124.8	249.059	293.754	312.653	1091.28	1103.62	1138.3
YDR033W	MRH1	991.505	1097.67	1068.92	941.21	888.055	1039.65	1136.35	1003.04	1098.88	901.928	734.832	755.158
YDR034C	LYS14	24.819	23.838	24.6974	36.9366	30.846	32.1391	26.1565	27.2976	23.0943	31.7802	30.5055	30.8435
YDR034C-A	YDR034C-A	0	0	0	0	0	0	0	0	0	0	28.071	0
YDR034C-C	YDR034C-C	1.52644e-06	6.90999e-07	7.50162e-07	9.53096e-07	1.26932e-06	1.84843e-06	9.25533e-07	1.32316e-06	2.62343e-06	1.57304e-06	6.99221e-07	9.52294e-07
YDR034C-D	YDR034C-D	25.2756	25.6461	24.7955	29.7315	35.2965	33.7929	20.2433	19.108	17.4107	21.764	17.9727	20.4872
YDR034W-B	YDR034W-B	0	0	0	421.435	428.57	412.781	0	54.0781	0	532.529	642.186	541.915
YDR035W	ARO3	149.085	153.509	148.74	161.22	145.96	163.488	128.97	139.936	131.408	103.542	105.851	94.2558
YDR036C	EHD3	60.6615	64.2136	61.8588	82.4699	85.2157	83.8853	54.436	61.7488	58.0693	73.5453	77.0201	68.5197
YDR037W	KRS1	648.085	716.004	651.181	538.251	419.436	480.517	694.011	694.588	627.344	255.405	344.814	187.256
YDR038C	ENA5	35.0337	36.9073	35.3622	54.0855	48.7722	57.6856	37.6154	35.9939	30.7531	49.6204	43.3805	39.5449
YDR039C	ENA2	34.9469	38.0105	37.1564	60.3492	56.6712	65.8219	38.9555	36.1206	31.9283	55.2154	48.1552	44.2751
YDR040C	ENA1	36.9755	40.6014	38.8361	75.8139	77.1859	87.5482	40.8553	39.2161	33.3822	68.5701	60.5306	57.0756
YDR041W	RSM10	140.129	118.455	133.577	161.205	165.654	164.161	97.5649	99.572	116.177	97.1661	100.335	102.22
YDR042C	YDR042C	6.8854	5.99131	3.5861	2.36919	4.19675	4.40843	4.50273	10.0013	5.91517	0.383476	3.38377	3.94245
YDR043C	NRG1	28.1851	31.1241	32.7542	28.9101	42.8246	43.921	20.6157	21.8122	27.2684	66.3944	84.3222	113.639
YDR044W	HEM13	86.6026	97.4066	114.455	57.3961	63.5335	59.834	76.5597	73.3257	82.9055	38.9276	35.754	36.0923
YDR045C	RPC11	130.264	169.371	133.732	103.985	109.931	88.4817	114.121	121.583	113.796	77.6596	62.2541	70.0774
YDR046C	BAP3	116.812	106.27	105.373	103.477	102.849	111.734	124.583	110.501	105.164	68.919	70.7763	67.9965
YDR047W	HEM12	149.645	150.099	154.172	126.317	124.445	126.3	115.53	120.232	133.39	80.7253	83.3108	79.3031
YDR048C	YDR048C	0	0	2.13676	7.41231	1.75859	4.13703	0	0	0	5.18049	5.32518	2.73897
YDR049W	VMS1	33.0347	32.5637	33.1041	42.9517	38.682	41.8062	32.9709	33.1871	30.5202	34.8348	36.0789	30.138
YDR050C	TPI1	8054.23	7301.62	7729.17	5263.38	5480.08	4997.05	5003.45	5813.18	5809.45	3804.23	4446.99	4558.47
YDR051C	DET1	69.7811	74.448	67.4488	83.5795	93.6013	85.9077	68.1356	73.899	73.2722	70.7869	69.0239	76.2563
YDR052C	DBF4	46.6227	47.0736	45.1065	44.1323	46.5243	48.3489	46.7167	47.4443	42.7322	43.5073	38.3267	39.036
YDR053W	YDR053W	0	0	0	0	0	0	0	0	0	0	0	0
YDR054C	CDC34	108.142	101.192	105.729	135.675	143.145	137.121	105.067	102.799	110.843	160.145	152.344	134.86
YDR055W	PST1	151.842	123.055	152.057	470.915	464.814	527.993	140.57	126.588	135.542	328.709	266.338	264.691
YDR056C	YDR056C	164.855	154.128	152.581	140.921	148.104	160.189	127.111	122.112	137.963	109.918	120.578	114.936
YDR057W	YOS9	30.9691	28.6222	31.5981	39.1733	42.4786	42.3929	29.4797	26.6383	27.2513	36.3153	36.2409	30.1125
YDR058C	TGL2	22.0431	23.0459	22.1372	50.2113	60.9702	56.668	20.3294	24.5497	28.9503	57.7242	57.8155	61.2684
YDR059C	UBC5	67.3932	60.8308	61.7898	108.846	125.861	118.522	40.1661	48.7394	55.1735	108.189	145.017	140.174
YDR060W	MAK21	82.6339	99.9259	88.8464	79.5743	46.3891	61.9503	104.338	92.6743	82.3219	17.5082	25.987	7.88513
YDR061W	YDR061W	35.6582	33.3154	37.8327	48.7182	53.7438	52.4922	26.8631	32.1009	34.471	37.5214	37.1653	34.8296
YDR062W	LCB2	132.913	147.474	136.714	156.26	135.556	152.443	148.024	138.672	128.439	109.84	104.948	95.6419
YDR063W	AIM7	186.8	161.308	208.799	245.764	280.798	240.601	154.787	161.6	184.301	229.239	275.271	275.104
YDR064W	RPS13	5798.82	6464.32	6018.61	2975.11	2719.95	2876.32	5636.17	5409.51	5849.68	448.459	788.194	381.797
YDR065W	RRG1	22.7059	25.3011	22.0416	49.5051	48.1651	46.2275	21.5228	25.8116	21.8896	33.7712	41.2507	31.3629
YDR066C	RTR2	10.2562	10.7248	11.9242	18.8882	26.7742	23.2722	11.0328	12.837	13.0543	16.778	16.4593	17.6528
YDR067C	OCA6	47.5738	46.0937	48.5564	56.4857	66.4277	70.3039	39.016	40.1105	41.1134	60.2662	58.3264	58.1541
YDR068W	DOS2	103.923	100.606	107.359	117.529	142.618	124.564	76.054	82.6717	87.9359	92.0444	87.9782	80.6148
YDR069C	DOA4	18.105	16.7526	17.8858	29.4982	33.2443	33.7316	14.8415	17.6197	13.4569	31.4389	26.9727	30.1355
YDR070C	FMP16	17.689	3.07128	9.92818	219.17	400.33	259.547	18.1064	23.485	22.4512	847.814	875.142	1337.56
YDR071C	PAA1	441.564	416.509	404.855	387.628	431.757	420.872	397.981	452.571	452.185	482.751	514.091	479.829
YDR072C	IPT1	104.744	99.6367	109.59	75.2544	66.5603	75.1076	90.2971	91.3798	83.4314	57.4628	69.5672	50.5566
YDR073W	SNF11	63.5715	67.299	60.6585	47.1183	58.0232	60.6419	44.1438	55.2801	55.9781	43.5364	43.5895	42.6056
YDR074W	TPS2	81.6767	69.0375	89.9266	143.488	227.788	200.933	77.5985	84.4887	88.9535	174.74	133.523	251.907
YDR075W	PPH3	44.7457	50.1442	50.4849	44.5857	38.7034	52.4219	46.1559	42.3468	42.8075	25.2028	37.1922	24.5304
YDR076W	RAD55	7.8576	7.43593	8.90244	5.43633	4.52631	6.72442	8.90837	7.13887	8.37215	3.74862	2.42795	3.23438
YDR077W	SED1	1144.98	1114.75	1499.83	5194.44	5704.92	5527.97	1897.19	1728.24	1891.91	2996.27	2920.12	3405.33
YDR078C	SHU2	31.1331	30.3309	35.078	19.7314	20.7478	18.3393	21.6396	30.5308	27.1111	24.9263	24.0715	29.2053
YDR079C-A	TFB5	154.799	129.538	174.488	157.339	108.152	106.438	95.8101	119.351	108.664	108.356	200.919	141.704
YDR079W	PET100	94.3837	90.1639	137.857	139.263	205.898	166.433	93.5768	110.872	88.5549	150.198	141.038	145.855
YDR080W	VPS41	16.3268	19.4691	18.1396	29.6888	31.8095	32.6286	18.0816	18.4533	16.8362	24.3654	23.2721	20.5305
YDR081C	PDC2	26.2828	28.5602	26.9664	30.5505	27.8854	30.9153	28.7011	28.1559	25.2501	32.2256	29.6074	25.4637
YDR082W	STN1	22.4608	25.1226	25.2097	26.4411	30.4853	31.1651	20.9162	21.4355	24.3672	29.4916	32.2963	30.6594
YDR083W	RRP8	87.158	107.352	94.7796	62.0714	42.2095	53.831	106.251	101.503	90.6879	18.7265	24.8145	11.7942
YDR084C	TVP23	105.901	89.3854	102.45	132.365	140.85	145.515	84.749	71.5549	91.0514	121.824	108.632	85.612
YDR085C	AFR1	10.523	8.614	10.8523	29.97	44.4535	41.6165	9.13906	11.3934	12.4405	39.6811	36.4868	56.3064
YDR086C	SSS1	729.766	626.138	756.585	437.089	452.686	482.854	609.994	592.336	701.021	270.695	442.217	278.921
YDR087C	RRP1	117.033	138.885	117.42	70.67	54.5762	65.9658	120.179	135.482	133.964	19.9997	29.9714	13.104
YDR088C	SLU7	35.1448	34.425	31.442	38.5157	39.6567	37.7998	26.0165	28.1799	31.4563	34.5797	40.7249	34.9504
YDR089W	YDR089W	22.0049	28.2018	25.536	22.6578	25.4858	32.7046	21.0422	22.5992	19.9766	23.5459	22.3102	25.2034
YDR090C	YDR090C	42.8487	47.6833	48.6087	54.6354	53.7782	55.2884	37.0056	44.6965	45.3391	62.1323	60.3076	49.5367
YDR091C	RLI1	141.236	167.15	146.483	136.131	104.35	120.492	163.905	155.316	151.565	46.7623	55.4927	31.1182
YDR092W	UBC13	311.438	267.946	319.133	359.317	363.429	364.126	208.633	245.923	271.016	292.273	314.286	311.361
YDR093W	DNF2	28.8826	29.3893	32.4538	27.6183	25.3347	28.3377	31.3497	28.0623	24.809	19.6871	19.6812	18.7415
YDR094W	YDR094W	22.5595	37.2365	49.8549	16.8356	16.1285	21.0447	23.9147	17.2281	39.9799	9.18074	29.304	23.9098
YDR095C	YDR095C	0	0	0	0	0	0	0	0	0	0	0	0
YDR096W	GIS1	22.0086	21.2414	21.3128	16.5641	27.2064	25.6041	24.2745	22.6891	21.0408	21.4089	18.2265	26.7566
YDR097C	MSH6	27.199	28.9253	30.1699	18.0465	12.7267	17.6457	26.6906	25.9352	23.3393	10.2337	11.368	9.13009
YDR098C	GRX3	206.119	208.715	189.894	232.464	244.484	240.184	157.181	182.592	192.093	132.618	145.072	122.037
YDR098C-A	YDR098C-A	2.73289e-06	1.57265e-06	1.97145e-06	1.13455e-06	1.00397e-06	1.28282e-06	2.20129e-06	2.13592e-06	2.48992e-06	1.75268e-06	4.21515e-06	1.75341e-06
YDR098C-B	YDR098C-B	47.0234	52.4035	48.8463	89.0219	76.321	76.0964	42.1082	46.7066	42.8505	51.1546	54.6245	48.9743
YDR099W	BMH2	506.161	508.458	524.865	668.552	714.842	740.456	440.978	488.561	498.854	882.863	772.176	843.389
YDR100W	TVP15	114.521	100.996	114.774	229.624	264.239	229.379	87.3667	88.4029	110.514	219.903	179.562	219.905
YDR101C	ARX1	123.41	142.299	117.558	108.565	61.9955	89.0324	138.954	128.919	122.931	25.0363	42.8529	14.3845
YDR102C	YDR102C	5.48479	1.6338	5.21034	3.99942	4.28302	8.42683	4.75506	6.94762	1.72418	6.29673	2.14669	0
YDR103W	STE5	29.6568	31.355	30.6366	41.665	39.7495	44.2197	28.2322	28.7372	25.7443	41.6585	39.4788	38.4722
YDR104C	SPO71	8.29075	8.53906	9.62261	13.6337	14.6668	16.9843	8.25662	10.5822	8.97319	16.5277	17.0881	13.9536
YDR105C	TMS1	48.9277	48.5834	50.9029	62.369	74.1246	70.5801	41.4747	45.8288	41.4941	59.2337	51.5831	59.7754
YDR106W	ARP10	2.19515	2.77862	2.60263	1.31149	1.51531	3.19317	3.21745	3.82419	2.90681	0.832078	1.01344	1.50418
YDR107C	TMN2	18.3209	19.869	20.5425	17.558	17.7001	19.1453	17.3923	14.7545	15.3051	20.1061	17.5511	18.9116
YDR108W	GSG1	24.2927	23.0828	25.7071	25.1429	26.8309	26.1278	22.0778	22.3731	20.6911	22.873	19.9447	23.4576
YDR109C	YDR109C	21.7526	21.9414	22.782	31.5481	29.8982	32.4198	22.0584	20.421	20.3177	28.7011	27.4616	27.3202
YDR110W	FOB1	30.8426	36.9642	32.7331	35.774	31.4706	33.2362	30.8472	31.0248	30.0699	19.7638	21.9568	16.7471
YDR111C	ALT2	43.9864	46.7047	44.8709	15.503	15.4845	16.4227	43.26	41.7356	41.0176	14.3681	16.587	17.4196
YDR112W	IRC2	0	0	0	0	0	0	0	0	0	0	0	2.96411
YDR113C	PDS1	43.429	42.8471	43.9789	25.6207	35.1802	30.4817	32.0846	34.6789	42.531	21.2929	21.5148	21.3846
YDR114C	YDR114C	1.92545	4.6465	2.48306	0	6.14126	0	0	0	2.4331	0	0	0
YDR115W	YDR115W	266.266	253.531	265.893	335.837	321.651	328.76	179.739	223.575	215.585	192.368	238.643	276.687
YDR116C	MRPL1	75.2576	68.9164	81.2552	89.7968	102.506	101.455	57.7872	63.9073	72.7061	66.3434	73.9804	78.4369
YDR117C	TMA64	46.6363	54.4081	57.6873	49.6119	54.4734	52.1459	48.5259	52.2787	53.1967	48.4474	49.6688	47.6231
YDR118W	APC4	11.8373	13.7842	13.1627	13.9749	16.3726	15.5745	13.1637	13.7304	12.1556	12.3904	12.9986	16.9402
YDR118W-A	YDR118W-A	0	456.361	0	0	0	0	0	0	963.523	0	0	0
YDR119W	VBA4	67.887	83.6607	72.4823	75.4346	64.7037	71.3262	74.0054	67.5826	65.8277	34.2002	35.8088	33.3416
YDR119W-A	YDR119W-A	0	0	14.2635	0	24.8802	38.6632	0	0	26.4134	77.6601	0	56.6625
YDR120C	TRM1	97.8715	112.21	102.411	74.1534	49.1748	68.13	102.071	106.722	96.6173	23.4982	35.4932	14.5819
YDR121W	DPB4	69.3068	68.5006	82.3513	53.3796	61.9543	62.4118	63.5221	64.1848	76.4061	31.5587	43.8915	34.8952
YDR122W	KIN1	34.7853	29.5378	35.7448	49.4401	57.344	58.469	33.0579	31.1857	30.0205	74.2113	63.8245	76.6707
YDR123C	INO2	27.536	30.6613	25.5418	37.2432	33.6925	38.5434	27.3182	28.1774	29.1405	51.0211	56.0701	51.3772
YDR124W	YDR124W	4.61431	5.19996	3.8043	3.60509	3.34297	3.5631	3.68829	5.04757	3.77887	3.75746	4.15498	2.64917
YDR125C	ECM18	9.08532	11.0616	7.10142	13.0112	17.2664	16.5295	11.986	12.2998	10.2594	19.7638	18.1911	19.0703
YDR126W	SWF1	15.0256	14.8244	16.4543	17.6384	15.6266	14.8652	15.4206	14.537	13.7176	11.9948	16.5567	11.4004
YDR127W	ARO1	36.2032	41.4638	40.0147	54.4703	46.5286	51.2789	43.7643	40.9805	33.8794	29.2189	30.4346	26.0599
YDR128W	MTC5	23.9535	24.171	23.9772	30.9018	28.8812	31.4542	25.2545	26.6078	21.8565	31.9982	32.1561	28.7865
YDR129C	SAC6	158.993	161.254	165.244	240.643	244.687	239.136	138.677	137.047	129.088	236.803	204.126	225.451
YDR130C	FIN1	37.3128	34.4773	29.3502	37.301	41.4205	41.3813	28.2679	33.0009	31.8494	30.6576	31.7507	37.0586
YDR131C	YDR131C	16.2433	18.4011	17.5444	24.755	31.8711	29.5023	14.9519	18.706	17.5044	24.9747	23.6598	24.7153
YDR132C	YDR132C	13.4995	13.5814	12.7158	9.27239	9.9362	13.1079	10.6432	11.0969	9.88076	11.6119	12.0216	11.7314
YDR133C	YDR133C	448.665	440.716	452.457	322.463	449.325	397.716	434.754	401.344	638.952	175.675	132.562	141.982
YDR134C	YDR134C	955.871	874.726	986.839	578.815	904.706	739.263	1104.35	967.766	1266.64	280.423	246.973	228.545
YDR135C	YCF1	43.6582	47.6949	46.7843	51.9441	45.6052	53.3932	38.431	36.0802	31.2895	42.0891	42.3126	41.1197
YDR136C	VPS61	0	0	0	0.436714	0	0	0	1.14384	0	0	0	0.875241
YDR137W	RGP1	31.1864	36.2934	32.2373	33.7882	34.7148	34.597	32.8372	29.6595	28.4438	26.1285	27.5056	27.448
YDR138W	HPR1	31.2693	28.498	29.0731	31.8999	28.2211	31.6831	31.2693	31.1286	28.5861	24.4343	25.6716	22.6714
YDR139C	RUB1	500.693	578.282	573.203	539.086	720.374	510.373	360.321	460.342	553.685	521.742	487.781	498.77
YDR140W	MTQ2	59.2121	64.8969	57.1873	75.5861	75.2514	71.705	38.0678	46.5259	45.7848	53.847	66.9195	54.4779
YDR141C	DOP1	16.0574	19.047	18.2992	26.1217	24.162	27.6752	18.3552	17.4756	14.8402	26.9082	24.2803	25.5818
YDR142C	PEX7	27.0951	25.7751	24.101	23.5711	30.4792	29.8836	24.0122	25.5329	24.0711	35.4614	32.5766	30.6567
YDR143C	SAN1	49.5839	44.9948	49.1177	50.4683	46.6836	47.9381	53.7339	51.9794	48.0849	38.8115	42.5094	37.9103
YDR144C	MKC7	81.7413	85.2253	83.8421	55.7865	45.0345	46.3698	90.103	73.813	68.5637	23.9602	28.4699	23.5232
YDR145W	TAF12	71.5101	74.9991	79.9126	66.7207	68.3355	65.8945	68.931	70.8658	64.4885	68.9489	59.1097	66.4109
YDR146C	SWI5	47.5094	48.1942	50.5567	27.6316	31.4841	34.1065	56.2145	49.0992	50.3854	34.693	25.1482	30.387
YDR147W	EKI1	30.8674	35.1317	33.4698	33.6003	35.3826	33.9686	29.8629	30.9052	26.8441	30.5277	29.8839	28.1113
YDR148C	KGD2	87.8835	84.4719	94.329	111.335	112.729	115.445	82.4487	79.4896	82.8662	120.235	98.8145	110.511
YDR149C	YDR149C	0	0	0	0	0	0	0	0	0	0	0	0
YDR150W	NUM1	17.8433	18.3168	17.8923	21.0321	17.7899	21.4968	20.3446	19.0786	17.3438	27.199	25.2717	24.2481
YDR151C	CTH1	76.5761	84.9701	84.9246	54.7377	76.2803	61.7738	98.2697	110.406	107.577	206.93	207.149	212.225
YDR152W	GIR2	213.739	219.075	210.808	180.035	173.817	164.837	182.772	195.164	201.446	127.856	151.272	132.465
YDR153C	ENT5	54.55	53.114	57.9738	68.594	76.9548	78.6281	62.2274	65.5735	60.2449	66.5117	69.6899	61.9947
YDR154C	YDR154C	4332.35	3531.51	3765.39	4970.66	5710.63	4674.43	4611.09	5111.97	5678.34	5766.06	6716.78	6325.36
YDR155C	CPR1	5267.98	3897.68	4812.27	6352.92	6982.76	5531.17	5571.08	6203.79	6946.92	6604.89	8526.42	8076.18
YDR156W	RPA14	86.9719	101.57	82.1406	85.8477	102.409	136.038	107.033	82.2164	130.988	134.037	174.582	80.5538
YDR157W	YDR157W	2.26649	1.74877	0	0	4.61126	1.7993	1.69153	1.83206	1.88571	1.08207	1.08586	2.21236
YDR158W	HOM2	450.453	431.254	424.659	337.758	318.458	321.447	431.958	435.588	428.842	206.524	251.573	221.706
YDR159W	SAC3	21.6096	24.0209	22.0418	26.8193	22.9028	27.4906	26.2815	23.4999	21.7556	27.4432	25.9595	24.0317
YDR160W	SSY1	19.5028	21.215	21.4392	23.0584	24.5484	24.5947	19.4614	21.7492	18.905	26.6566	24.2186	25.6146
YDR161W	YDR161W	122.1	142.004	131.674	87.4319	63.0748	82.2136	118.213	121.296	118.761	32.1109	49.6791	24.8261
YDR162C	NBP2	54.1971	49.3774	50.3489	71.0167	75.0296	80.4248	37.2542	47.9722	50.9754	62.8183	67.146	69.114
YDR163W	CWC15	57.8855	57.0994	66.0632	63.828	91.1693	77.4939	46.7794	50.2532	51.9547	57.2154	75.4775	62.7112
YDR164C	SEC1	32.8075	37.5139	35.399	51.2594	51.7934	53.1136	35.3471	34.0638	32.3097	34.9605	36.3232	31.5942
YDR165W	TRM82	97.12	120.996	96.9383	91.543	60.0066	77.3509	104.072	101.043	90.7009	22.5227	30.8641	11.9713
YDR166C	SEC5	22.0422	21.8971	23.1523	26.9711	27.3924	31.149	20.598	21.0366	20.057	30.128	31.7155	31.1509
YDR167W	TAF10	127.244	126.29	128.988	117.24	128.344	113.522	109.842	118.072	119.065	82.8342	97.3629	83.3476
YDR168W	CDC37	104.661	100.885	100.119	168.518	184.235	172.528	95.8557	92.4255	94.9293	180.562	149.652	172.576
YDR169C	STB3	42.2803	35.3577	37.6896	55.5995	56.9892	65.5089	43.3262	40.3157	38.0207	61.3564	61.7875	65.7905
YDR169C-A	YDR169C-A	0	56.4502	0	0	0	0	0	0	0	0	0	0
YDR170C	SEC7	33.0478	36.7436	35.2499	31.9183	28.7966	32.2513	39.3699	37.2946	29.8246	32.305	30.254	29.5683
YDR170W-A	YDR170W-A	8.33547	7.58426	7.31315	11.5769	10.936	12.3671	6.98594	6.5302	7.85838	14.711	13.1304	9.66619
YDR171W	HSP42	106.66	67.6909	109.537	263.771	496.368	335.684	394.126	486.995	517.13	6534.82	5983.36	7207.54
YDR172W	SUP35	193.391	212.677	208.409	211.468	172.229	194.536	211.153	204.739	189.633	115.341	126.578	97.9285
YDR173C	ARG82	20.6058	24.1171	23.1772	37.9269	48.525	45.2827	16.2431	24.4451	22.7233	24.5986	28.5866	38.1769
YDR174W	HMO1	363.791	322.579	322.145	414.152	409.741	390.658	287.531	332.172	307.047	376.391	378.202	345.267
YDR175C	RSM24	83.7386	81.1054	83.6936	94.5428	89.5467	89.9637	70.4349	81.1165	72.0662	65.5132	74.6411	59.97
YDR176W	NGG1	47.5567	49.258	54.1431	42.7402	47.4972	46.049	47.5387	46.234	50.6378	44.5532	43.8381	43.5758
YDR177W	UBC1	206.51	197.281	230.964	244.686	263.55	253.706	185.822	211.431	214.328	194.665	220.691	206.914
YDR178W	SDH4	83.7695	70.2054	68.9691	135.624	173.21	160.052	66.6932	75.8183	92.4342	280.67	250.938	282.602
YDR179C	CSN9	44.0694	47.7107	44.5133	38.9998	40.2059	41.9425	41.1263	38.3135	47.8393	27.0854	21.9112	23.9373
YDR179W-A	YDR179W-A	16.1937	20.1894	20.4178	22.8494	18.9768	20.8936	18.9136	18.5361	18.0331	15.6908	18.4031	16.364
YDR180W	SCC2	9.79478	12.4186	10.8008	13.3328	9.99679	12.1476	10.9977	10.7288	9.94042	10.034	11.7856	9.64882
YDR181C	SAS4	32.1993	31.6881	32.939	34.7008	39.7653	40.4774	31.3367	30.76	29.0724	33.7095	33.014	30.2486
YDR182W	CDC1	65.6973	70.628	68.149	74.0715	81.0966	83.8271	67.1489	62.7895	64.9693	76.7392	72.3016	78.8056
YDR182W-A	YDR182W-A	0	0	0	15.4365	11.5904	0	0	0	12.3568	29.1529	0	17.6605
YDR183C-A	YDR183C-A	60.8917	48.1741	57.4002	88.9731	36.0172	40.5678	56.4932	112.089	54.8603	11.2446	58.2342	31.7281
YDR183W	PLP1	40.3538	34.7226	42.2222	54.5722	65.1726	69.0061	36.7824	36.9813	45.9704	63.6647	61.6464	55.8876
YDR184C	ATC1	69.8288	72.8437	60.4832	81.7743	77.2879	69.6493	76.5651	79.712	77.5505	32.1551	48.6119	18.9571
YDR185C	UPS3	26.3319	15.784	17.8679	14.3311	12.6565	11.0289	24.4959	20.699	21.1144	17.4676	19.5767	17.418
YDR186C	YDR186C	44.7832	46.074	49.165	74.5419	71.751	82.7837	42.9718	41.7149	43.3991	70.5	68.0698	69.6802
YDR187C	YDR187C	0.402827	0	0	0	0	0	0	0	0	0	0.524282	0
YDR188W	CCT6	240.123	217.078	227.621	282.739	272.971	262.896	233.671	235.536	234.007	283.351	305.897	263.967
YDR189W	SLY1	78.0684	82.7971	74.7151	86.0816	76.7155	81.7587	74.324	73.7272	73.1855	64.671	65.8458	62.5161
YDR190C	RVB1	167.159	166.468	162.259	162.522	149.551	158.724	155.165	150.251	145.016	85.299	95.185	77.4016
YDR191W	HST4	20.0219	18.8543	22.3317	20.7009	25.6825	23.9817	20.1487	21.4024	19.0592	24.7877	23.2701	22.7211
YDR192C	NUP42	22.5747	21.6529	22.4223	30.6442	33.5408	38.5075	22.3902	22.6276	22.8595	26.9938	28.58	30.1157
YDR193W	YDR193W	0	0	0	0	0	0.920311	0	0	0	1.10866	1.11335	1.13363
YDR194C	MSS116	121.744	127.019	124.65	146.496	140.225	147.945	90.5692	95.7007	92.2805	107.964	102.864	87.678
YDR194W-A	YDR194W-A	0	0	0	0	0	0	0	0	0	0	0	0
YDR195W	REF2	33.8837	37.2125	33.8927	31.3254	33.0222	35.6637	31.6282	35.2598	33.3153	37.8654	41.4507	43.0875
YDR196C	CAB5	99.9909	113.356	107.236	116.739	146.205	128.291	81.6753	100.822	109.229	124.698	144.59	152.957
YDR197W	CBS2	33.5533	36.4665	32.5019	47.556	60.9817	56.7933	27.2359	32.9111	32.8599	30.8297	33.3031	36.8449
YDR198C	RKM2	29.9597	29.6625	30.8368	33.8087	31.5429	35.0605	26.7485	29.2287	30.0974	24.1718	26.6295	19.9585
YDR199W	YDR199W	0	0	0	0	0	0	0	0	0	0	1.50604	0
YDR200C	VPS64	26.5892	26.2404	28.8024	32.775	36.6792	36.4563	27.947	27.7494	27.0588	48.448	36.8404	44.6498
YDR201W	SPC19	66.098	74.5394	73.0797	58.6855	73.5932	81.1901	56.7067	63.0552	71.0354	54.6806	61.5608	60.7935
YDR202C	RAV2	39.8417	38.1767	45.5952	62.8595	79.6517	77.5773	33.5216	43.1666	46.4572	77.1076	76.4668	85.1352
YDR203W	YDR203W	0	0	0	2.38182	0	0	0	0	8.13527	0	0	0
YDR204W	COQ4	32.333	30.7937	34.4922	81.8543	90.1571	83.4746	28.295	34.1616	31.3198	111.099	104.2	121.223
YDR205W	MSC2	23.5514	24.6377	23.7705	32.9946	30.2384	34.7274	23.9587	24.659	22.8813	40.8995	37.0948	36.9605
YDR206W	EBS1	47.6096	53.5541	52.1458	55.3577	42.6292	51.2747	56.1879	50.8979	50.7038	43.9977	43.3397	36.9054
YDR207C	UME6	25.7324	27.8718	26.7228	29.335	30.2395	31.8855	33.0145	30.3475	25.8383	23.8497	21.9298	23.64
YDR208W	MSS4	46.7419	49.6214	47.8914	64.9349	64.8261	66.9692	51.4088	48.5485	51.6504	67.2353	58.0212	63.4442
YDR209C	YDR209C	0	0	0	0	0	0	0	0	0	0	0	0
YDR210C-C	YDR210C-C	3.11898e-06	1.1371e-06	9.4809e-07	7.98368e-06	1.04596e-06	1.00892e-06	2.93501e-06	1.24362e-06	2.01152e-06	5.05117e-06	1.5757e-06	1.37266e-06
YDR210C-D	YDR210C-D	46.5632	53.2844	45.6028	91.1989	75.0754	74.0053	41.8165	42.8018	37.3529	52.544	53.7322	47.9946
YDR210W	YDR210W	451.075	400.582	503.603	367.555	276.897	306.808	384.313	374.432	362.222	312.637	379.643	334.939
YDR210W-A	YDR210W-A	1.63992e-07	1.45701e-07	6.08516e-08	5.49395e-08	2.42398e-07	9.98656e-08	1.08622e-07	4.54915e-08	3.25321e-07	7.03869e-08	9.34941e-08	8.08162e-08
YDR210W-B	YDR210W-B	35.3738	32.8756	34.1896	44.1807	39.5761	46.4105	24.7721	26.5279	19.7552	26.6254	24.5155	24.1522
YDR211W	GCD6	88.3219	95.4087	90.1334	113.592	92.0294	102.539	90.5245	91.2311	87.7422	58.8699	62.9799	56.203
YDR212W	TCP1	166.295	168.695	171.325	215.262	209.702	216.66	184.185	186.86	176.192	222.247	207.26	196
YDR213W	UPC2	8.27518	10.9314	12.8257	10.9202	9.16022	10.7304	11.1118	8.86175	8.09542	13.2811	12.2913	10.9207
YDR214W	AHA1	196.646	164.89	183.539	845.033	1068.91	871.866	426.028	424.298	441.538	2556.23	2410.65	2657.69
YDR215C	YDR215C	0.86386	0	0	0	0	0	0	0	0	0	0	0
YDR216W	ADR1	9.60588	9.55338	8.88808	14.2751	21.0515	22.5606	17.6382	17.1475	16.9381	19.9856	20.0789	22.854
YDR217C	RAD9	20.3188	20.6559	19.8501	24.2697	18.4829	22.872	20.6946	20.8204	19.2257	21.1648	20.4495	18.5276
YDR218C	SPR28	0.588541	0	0	0.879919	0.683068	0.432211	0.309027	0.330161	0.48131	0.236736	0.229944	0.612892
YDR219C	MFB1	35.8272	39.8767	39.1796	33.1972	40.0009	40.9864	34.792	42.3341	38.0078	37.3885	30.0963	39.7096
YDR220C	YDR220C	0	0	0	0	0	0	2.55344	0	0	0	0	0
YDR221W	GTB1	27.0104	27.7249	29.3562	38.8732	37.1863	41.3342	33.5109	30.3076	27.8638	49.7892	48.6064	43.7733
YDR222W	YDR222W	54.0769	52.7429	41.1311	32.3423	40.4004	39.9845	73.1695	92.9548	102.934	78.8961	98.6661	69.0852
YDR223W	CRF1	0.952614	1.41315	1.93828	3.65639	4.39211	4.47659	1.99818	1.84336	1.6991	5.10375	4.55039	5.3953
YDR224C	HTB1	2618.36	2644.68	2523.38	1101.44	1015.57	945.088	2369.89	2602.66	2728.47	1379.52	1421.77	1379.58
YDR225W	HTA1	1362.85	1328.06	1421.58	368.185	405.006	442.486	1124.57	1188.9	1485.28	508.505	605.662	573.616
YDR226W	ADK1	1520.46	1422.88	1413.77	1145.34	1100.65	1101.41	1183.76	1190.28	1248.8	493.359	519.536	551.014
YDR227W	SIR4	18.7494	21.521	18.6691	23.0017	20.6648	24.7365	22.5003	21.6395	20.3357	23.5884	22.077	21.667
YDR228C	PCF11	37.0562	44.3662	38.0197	43.8256	42.2608	40.1898	39.1021	38.1824	39.623	35.8137	35.1534	37.5116
YDR229W	IVY1	45.6964	39.5477	47.1662	54.9233	62.177	60.9712	35.4861	39.0166	41.0377	40.2856	39.1862	47.1149
YDR230W	YDR230W	0	0	0	0	0	0	1.35325	0	0	0	0	0
YDR231C	COX20	47.0809	37.1813	50.3466	43.3314	82.4071	77.0203	32.8525	38.1805	40.9826	102.98	93.7429	107.799
YDR232W	HEM1	80.395	86.2005	83.9028	100.423	87.6974	100.862	93.7942	76.5453	77.0099	91.6754	101.881	75.1586
YDR233C	RTN1	715.705	755.877	742.913	706.046	646.433	683.148	800.28	718.058	753.776	435.787	470.557	433.682
YDR234W	LYS4	58.2894	66.0163	64.0205	50.8905	34.3774	43.0129	71.138	71.1797	63.4509	19.6512	25.277	17.2402
YDR235W	PRP42	43.9127	43.7962	43.043	43.3725	44.0764	47.0789	39.3569	43.4759	42.7218	38.0165	34.4902	37.4713
YDR236C	FMN1	61.2565	65.9627	56.627	95.2879	118.141	115.981	49.1565	56.4185	70.3174	92.5759	110.756	96.3257
YDR237W	MRPL7	81.8735	74.8259	81.6504	99.3814	94.8707	95.2234	76.3132	64.9323	76.8328	64.1844	67.1802	64.8762
YDR238C	SEC26	86.2222	99.471	95.3775	102.154	92.8346	101.947	102.274	93.6275	86.1894	78.9452	70.3853	73.4574
YDR239C	YDR239C	17.35	18.9504	18.379	19.2178	16.9062	20.6068	19.2874	19.5978	17.6389	17.5722	15.4138	15.864
YDR240C	SNU56	20.6242	22.424	23.0417	29.0659	27.6104	27.6636	23.7451	24.6343	24.3896	22.1341	25.837	21.6214
YDR241W	BUD26	0	0	0	0	2.51346	2.91507	0	0	0	0	0	0
YDR242W	AMD2	8.74345	8.64741	8.44712	17.7867	20.2071	19.9719	9.07967	9.53712	11.3258	22.3854	24.9385	20.2918
YDR243C	PRP28	17.5548	18.2031	17.5637	22.4768	17.7057	19.4492	17.5454	18.1492	16.5347	19.5767	17.8491	13.3952
YDR244W	PEX5	27.6178	31.7792	33.133	30.5939	34.6865	36.5535	28.2662	29.2386	27.5609	37.6895	31.3409	34.8218
YDR245W	MNN10	163.385	167.543	169.117	124.555	118.48	123.121	148.297	149.259	158.01	84.3076	90.6742	81.0623
YDR246W	TRS23	51.9851	51.0486	60.5347	73.8079	89.8595	72.2944	60.8824	51.9488	56.2496	89.2186	84.4461	89.8822
YDR246W-A	YDR246W-A	20.4746	37.6618	0	16.5193	0	0	0	0	13.2067	46.5961	0	75.55
YDR247W	VHS1	18.8335	15.3205	18.9738	8.44653	10.5464	8.51939	16.5244	14.7917	17.6992	16.2014	14.7017	20.6229
YDR248C	YDR248C	78.7078	62.0293	87.5248	93.1183	106.438	106.855	48.2338	49.524	69.1909	71.3402	81.1475	88.1188
YDR249C	YDR249C	20.3285	23.5659	19.4666	20.4768	22.1888	24.3599	14.5839	18.7032	18.9972	20.5925	23.0808	22.6894
YDR250C	YDR250C	0	0	0	0	0	0	0	0	0	0	4.47028	0
YDR251W	PAM1	50.9579	52.6682	54.3724	53.0255	61.1896	59.5726	53.0061	53.0288	53.9935	79.1761	64.4043	77.8439
YDR252W	BTT1	31.3198	41.4427	36.8469	44.2956	32.7692	47.0997	38.8509	43.8914	34.7738	26.1547	33.6443	42.4446
YDR253C	MET32	10.4435	5.45804	10.5776	13.3963	17.3357	18.1818	8.79192	11.319	8.87428	7.58579	14.8952	11.6873
YDR254W	CHL4	22.0043	22.3016	22.9979	18.9634	20.2952	22.7438	18.3364	19.5872	21.4351	21.5696	15.4475	23.7821
YDR255C	RMD5	14.3094	10.4263	15.1267	21.3745	25.4273	24.7875	11.1932	12.6232	12.3481	28.784	24.4111	35.6455
YDR256C	CTA1	5.06812	3.92231	4.06742	3.92441	3.58791	3.03631	6.27491	4.59659	5.27135	2.02613	2.68118	3.24506
YDR257C	RKM4	43.3462	48.752	45.9482	58.253	57.6369	56.1149	44.5423	49.6545	44.8713	47.8268	43.3128	41.6163
YDR258C	HSP78	52.6649	48.017	56.6888	184.53	301.467	243.953	247.366	249.811	268.853	2250.62	1806.14	2274.44
YDR259C	YAP6	13.9428	10.5836	14.1526	35.3741	32.7486	41.4843	14.3122	13.9156	14.0998	19.7285	19.8304	20.7005
YDR260C	SWM1	50.3826	44.5883	53.8855	47.9682	51.4717	59.3644	36.3791	41.5152	41.9612	48.1202	58.2463	44.8143
YDR261C	EXG2	61.7256	57.1593	59.3986	84.7772	83.8808	85.6615	60.4139	61.3454	57.0097	67.8496	61.4677	72.7125
YDR261C-C	YDR261C-C	1.13219e-06	2.26477e-05	5.3643e-07	5.06938e-06	2.06118e-07	2.23316e-07	7.77502e-07	3.96357e-07	6.23959e-07	1.31208e-06	3.93392e-07	4.47709e-07
YDR261C-D	YDR261C-D	91.9904	119.404	100.06	170.151	185.869	158.058	117.114	100.904	84.8632	108.897	126.838	107.524
YDR261W-A	YDR261W-A	3.98646e-07	1.19744e-07	3.58782e-07	5.78162e-07	5.48827e-07	4.5545e-07	1.11245e-07	1.94617e-07	2.42793e-07	3.8516e-07	6.33155e-07	4.62759e-07
YDR261W-B	YDR261W-B	19.2742	22.988	21.0032	27.1174	25.979	31.2973	15.759	18.1571	14.9455	18.2635	15.7313	15.905
YDR262W	YDR262W	101.561	101.259	109.195	102.962	114.236	135.821	89.3237	109.824	117.397	131.986	169.027	158.348
YDR263C	DIN7	11.8157	14.7491	13.7025	7.01495	7.74019	7.40529	10.59	10.5595	10.6049	9.84753	7.53883	8.99872
YDR264C	AKR1	105.096	106.629	116.795	115.922	113.714	122.763	77.5793	74.6724	65.3313	105.775	102.694	94.539
YDR265W	PEX10	30.7234	27.5001	33.6605	37.8022	49.0623	46.0473	27.5028	27.9089	32.3648	35.9937	44.4346	44.4081
YDR266C	YDR266C	45.8594	49.9875	48.9487	68.1145	67.3874	67.6619	50.1864	50.3332	49.3423	54.515	51.2134	52.2655
YDR267C	CIA1	68.9059	65.8267	70.6063	67.7952	56.8889	56.908	66.1322	73.0077	66.4693	42.7466	51.9472	44.0361
YDR268W	MSW1	27.5571	24.6724	27.6343	46.1857	42.6607	41.6956	24.031	24.7912	23.1799	35.7745	31.9067	32.9136
YDR269C	YDR269C	0	0	0	0	0	0	0	0	0	0	0	2.44307
YDR270W	CCC2	36.288	33.8721	39.105	26.1269	27.6748	32.8593	17.3597	17.6806	17.4546	24.6333	24.8045	23.8099
YDR271C	YDR271C	0	0	0	0	0	0	0	0	1.19132	0	0	0
YDR272W	GLO2	93.6222	94.1657	100.587	203.612	242.475	219.348	82.8527	94.9032	93.9054	272.149	264.642	311.932
YDR273W	DON1	9.51032	9.7312	11.5122	11.9179	14.556	12.8701	10.1358	13.2402	11.0907	11.8344	13.3293	14.188
YDR274C	YDR274C	0	0	0	0	0	0	0	0	0	0	0	0
YDR275W	BSC2	38.9493	43.8982	49.6268	42.5616	57.0061	51.8008	36.4344	51.4166	46.5902	52.2174	56.0054	66.9909
YDR276C	PMP3	2193.57	1888.57	1684.83	1633.76	1741.04	2044.72	1182.97	1464.18	1666.51	2373.66	1954.18	2344.07
YDR277C	MTH1	9.31244	8.81247	10.3263	11.5875	16.2912	15.937	19.8924	15.9121	18.5703	5.74041	6.80154	7.25314
YDR278C	YDR278C	0	0	0	0	0	0	0	0	0	0	0	0
YDR279W	RNH202	53.9565	60.9923	61.8235	44.1748	41.0136	42.279	51.142	56.7903	55.5944	36.7194	40.768	33.3986
YDR280W	RRP45	84.353	89.2121	79.6879	71.9672	79.5106	77.7324	79.634	78.1072	82.3323	49.8383	57.2481	45.3393
YDR281C	PHM6	11.689	4.01037	6.41029	2.47077	5.27578	12.4111	15.6094	10.7392	12.6336	2.59024	0	0
YDR282C	YDR282C	21.5432	17.4651	18.4301	29.6003	38.4194	32.2214	16.8404	19.6904	19.5438	29.4673	31.8191	37.8256
YDR283C	GCN2	15.1598	17.3129	14.5437	17.7569	15.8157	17.6663	15.934	15.5372	14.2701	14.7339	15.4619	16.1754
YDR284C	DPP1	120.806	110.452	123.968	126.05	139.965	134.73	97.3452	111.761	106.57	99.2262	100.412	101.888
YDR285W	ZIP1	8.67644	8.7439	8.82021	16.3611	18.0145	18.1965	8.57741	10.2185	7.7769	13.8505	15.5699	15.9051
YDR286C	YDR286C	60.7508	80.6369	63.492	117.649	125.747	132.181	44.6479	74.7194	77.7908	99.3751	90.026	95.3656
YDR287W	INM2	36.9647	44.0187	45.9164	77.5762	99.8809	90.4488	31.8972	37.7855	36.2739	83.4198	83.1015	81.1468
YDR288W	NSE3	36.5807	40.2361	41.8631	37.1252	46.1068	38.7294	37.6822	39.0826	45.1461	34.8104	35.9751	43.6416
YDR289C	RTT103	39.6339	41.4559	42.035	47.145	60.5262	53.8164	34.8627	36.9623	40.9615	36.8742	39.3093	38.0521
YDR290W	YDR290W	0	0	0	0	0	0	0	0	0	0	0	0
YDR291W	HRQ1	15.2489	17.9631	15.5259	22.0874	21.2651	23.4237	16.1725	15.8637	14.5444	19.8989	18.9716	17.731
YDR292C	SRP101	103.547	109.736	105.049	94.4371	91.3632	93.5767	95.2638	93.3465	92.0864	67.2548	69.2768	59.5445
YDR293C	SSD1	62.179	61.5037	65.0915	85.777	89.811	95.8263	65.5037	59.4927	56.8367	134.345	116.383	136.068
YDR294C	DPL1	66.9077	65.9239	69.1136	104.985	107.19	112.336	63.6101	55.7981	58.0754	88.3836	80.3836	80.369
YDR295C	HDA2	24.8745	25.0986	27.6236	36.9862	37.3864	37.1187	24.6853	24.3605	25.0331	29.2219	30.2683	26.3703
YDR296W	MHR1	110.887	92.9203	119.842	146.628	151.632	133.699	101.209	100.535	99.1604	77.8584	101.989	88.9866
YDR297W	SUR2	82.3221	91.2964	99.2159	62.219	67.3861	73.5823	85.9268	86.73	79.3758	47.1592	59.308	50.378
YDR298C	ATP5	197.084	217.264	208.311	198.117	216.846	201.041	197.173	232.343	240.16	197.244	198.602	200.094
YDR299W	BFR2	84.8852	94.6959	89.7716	89.7259	61.3655	76.8933	94.8993	95.3459	83.8654	22.9838	39.0478	10.5874
YDR300C	PRO1	106.683	105.126	104.941	73.9973	65.9914	71.838	94.1571	95.4992	90.3235	32.5205	40.5291	26.7983
YDR301W	CFT1	18.5072	20.1985	20.4016	20.6071	20.358	21.9992	18.2608	20.1139	17.1748	19.4676	19.6822	17.4735
YDR302W	GPI11	86.8967	78.4062	80.6115	72.806	86.1224	81.1878	72.0509	67.1249	71.6475	59.9085	54.8269	48.3131
YDR303C	RSC3	41.7903	45.6298	42.1483	49.7119	51.5708	52.5874	41.6028	38.9411	37.7415	51.3382	45.972	46.5274
YDR304C	CPR5	458.63	454.98	454.808	599.335	670.702	645.281	344.417	409.141	411.109	554.187	592.919	605.757
YDR305C	HNT2	54.1068	60.482	54.7167	56.3546	69.1234	62.6967	42.2221	40.9378	45.8176	48.4868	55.7783	46.8857
YDR306C	YDR306C	30.3737	31.4785	31.7098	35.6189	41.3854	41.1343	25.2304	31.8493	35.2821	40.1459	42.9954	43.2703
YDR307W	YDR307W	32.8088	31.2253	27.9055	39.5134	46.1033	44.5871	28.3065	29.2029	29.8206	43.7837	40.4092	45.7575
YDR308C	SRB7	82.6935	93.5121	96.6382	106.012	107.772	105.784	73.6709	94.5964	86.6742	78.3981	86.6028	87.6188
YDR309C	GIC2	143.89	148.353	155.35	137.558	121.595	131.716	132.271	141.475	152.223	69.0496	94.9494	61.402
YDR310C	SUM1	45.113	48.1124	48.3217	59.1189	53.7523	57.1506	50.2397	44.1158	43.5356	37.292	34.8824	34.6137
YDR311W	TFB1	29.3035	30.123	30.1911	32.4521	33.385	33.4509	20.3228	19.6534	18.8909	21.3609	19.0727	20.1034
YDR312W	SSF2	58.0201	63.3351	62.0049	65.0559	52.3807	64.5344	47.6609	52.4254	49.716	32.0552	36.3822	24.9036
YDR313C	PIB1	36.9342	32.0785	35.6613	34.3889	41.9903	42.9334	31.6608	36.7052	38.2201	85.1917	85.207	98.8492
YDR314C	RAD34	6.49942	6.69489	6.61852	10.9448	11.9984	12.3354	7.47097	6.76737	5.17477	14.844	13.515	15.5959
YDR315C	IPK1	27.6161	23.9043	28.4777	40.2044	44.4717	46.9553	19.616	23.7048	20.8823	41.1322	57.9089	48.8196
YDR316W	OMS1	32.9474	32.6232	31.5919	46.9166	49.6775	52.8638	28.8452	29.5635	29.9454	39.1528	34.8084	32.8773
YDR316W-A	YDR316W-A	8.67823e-07	4.71223e-07	3.62587e-07	3.8057e-07	6.0381e-07	9.22637e-07	4.71797e-07	6.69837e-07	1.09965e-06	8.75773e-07	1.00774e-06	6.47013e-07
YDR316W-B	YDR316W-B	56.7012	64.8812	59.6237	105.061	91.0553	93.1272	57.9026	66.6562	49.1453	60.0508	70.239	62.1595
YDR317W	HIM1	5.54544	5.49218	4.28053	9.43591	11.8368	10.8886	6.88445	8.14777	8.04019	9.37596	11.5921	10.8433
YDR318W	MCM21	25.2819	27.4617	28.0489	24.3286	32.5409	28.0543	22.2764	29.2309	28.2911	20.8346	21.364	20.9704
YDR319C	YDR319C	51.4714	47.1318	44.5878	60.0217	60.2192	59.9079	26.0448	33.519	31.3261	53.6818	51.6846	49.9818
YDR320C	SWA2	24.3153	27.7169	27.7797	40.5365	40.6906	43.3781	29.7202	28.1413	24.171	37.1321	35.285	34.4617
YDR320C-A	DAD4	379.961	371.343	445.913	224.771	324.456	230.615	296.14	298.378	353.159	238.382	234.405	360.701
YDR320W-B	YDR320W-B	0	0	0	0	107.629	100.905	0	0	0	0	0	0
YDR321W	ASP1	165.072	197.675	175.522	106.434	73.8874	93.2813	183.816	168.283	156.724	30.8924	34.5219	28.5949
YDR322C-A	TIM11	237.544	218.62	303.131	365.169	396.883	385.45	220.242	241.785	315.091	369.062	365.624	376.882
YDR322W	MRPL35	83.3197	76.3764	76.6504	96.0807	103.147	105.331	65.9156	74.0766	69.102	57.4386	58.903	53.6596
YDR323C	PEP7	12.6703	14.5209	15.5466	18.4447	20.5771	18.5553	13.7565	15.2933	12.7077	21.2744	19.0364	23.6699
YDR324C	UTP4	68.8519	77.1925	68.9444	78.2656	47.2874	66.7274	83.6054	77.4692	66.2793	22.7185	29.9065	12.663
YDR325W	YCG1	15.8242	18.5788	17.5535	22.5935	18.3793	19.6522	15.2775	15.844	14.8549	12.9498	12.9004	11.5741
YDR326C	YSP2	21.3479	23.5952	22.882	23.714	20.4751	27.0294	22.7703	20.4037	17.5599	27.0869	26.6833	22.6241
YDR327W	YDR327W	0	0	0	0	0	0	0	0	0	0	0	0
YDR328C	SKP1	314.304	297.857	338.82	385.445	386.016	348.182	253.407	292.671	316.523	332.37	335.097	357.145
YDR329C	PEX3	58.7552	56.819	64.258	70.4157	79.9569	80.2968	54.0253	55.7068	55.3454	77.2444	72.8346	74.2582
YDR330W	UBX5	43.3069	39.7225	48.2686	75.9069	79.306	86.7718	39.0437	46.5121	43.3324	107.189	109.989	107.433
YDR331W	GPI8	61.1652	62.5392	52.4525	52.1958	53.4633	51.5962	63.5105	56.4343	57.4356	58.0287	54.2231	52.1927
YDR332W	IRC3	16.5478	16.1725	16.7576	22.1851	24.0092	25.0937	17.4065	18.4614	15.9358	21.7957	26.3506	23.8829
YDR333C	YDR333C	52.3278	51.8661	54.4232	54.8819	52.0163	49.5387	56.1182	57.4953	51.1908	58.0013	56.5342	50.441
YDR334W	SWR1	25.1012	24.8406	26.0801	31.519	31.204	31.8931	26.4801	26.2979	23.8963	31.2482	28.8037	25.4464
YDR335W	MSN5	39.7809	41.1284	40.4856	56.7044	61.0961	62.8079	40.345	40.8488	37.4025	61.0945	51.7793	56.9976
YDR336W	YDR336W	35.9424	38.3787	36.6587	44.6789	50.2236	37.8306	27.3052	36.2903	35.9037	27.8917	32.1959	33.0866
YDR337W	MRPS28	73.8683	67.0899	74.0962	91.4873	99.6436	96.8325	60.4917	63.1934	67.8098	60.2927	69.97	60.585
YDR338C	YDR338C	15.3055	15.6018	15.0073	17.4331	16.5963	18.4105	15.4867	16.0522	15.7771	20.5483	19.1117	18.7141
YDR339C	FCF1	184.497	183.921	178.388	165.962	161.247	159.173	149.037	181.497	188.972	91.3497	123.572	76.5495
YDR340W	YDR340W	0	0	0	0	0	0	0	0	0	0	0	0
YDR341C	YDR341C	221.747	254.558	237.455	171.28	155.014	167.071	250.119	233.095	220.401	86.7062	89.2638	79.3944
YDR342C	HXT7	33.1959	37.9446	26.5088	167.987	213.991	198.301	47.6476	41.4228	63.5856	33.0114	23.9382	37.6347
YDR343C	HXT6	30.3413	33.7381	24.8299	145.004	188.661	173.174	43.3085	36.8652	55.8465	28.6613	20.7044	33.2517
YDR344C	YDR344C	6.36304	3.30259	3.53288	2.37507	4.09325	2.71174	5.11097	2.757	3.59806	0.799216	0	2.44951
YDR345C	HXT3	602.07	552.683	662.877	237.267	147.669	277.006	573.944	550.726	517.299	135.009	225.605	102.049
YDR346C	SVF1	200.042	215.552	200.682	145.744	112.323	128.377	192.266	201.389	185.285	87.0829	100.259	70.5801
YDR347W	MRP1	103.124	86.3164	101.894	109.959	131.875	141.91	90.5907	87.9093	87.3586	92.0984	93.503	77.329
YDR348C	YDR348C	66.2103	67.6258	65.8637	51.6652	54.0322	56.033	63.7285	64.3136	58.4078	48.1655	45.5567	44.7435
YDR349C	YPS7	73.1675	73.1377	76.1856	84.3376	74.2461	82.6316	74.6587	69.2762	65.5357	73.9608	71.8847	69.3915
YDR350C	ATP22	24.4469	23.5748	28.6334	36.0814	42.9855	48.3827	22.1984	26.0791	27.1538	44.3439	40.3953	39.7745
YDR351W	SBE2	26.1894	27.0399	26.196	44.6469	37.9224	43.5421	30.659	31.3288	27.1174	40.6002	34.787	29.1034
YDR352W	YDR352W	39.2129	42.278	40.2601	39.9816	40.7913	37.3975	29.98	42.9585	36.8411	30.6789	39.9841	32.6304
YDR353W	TRR1	589.528	535.179	607.159	551.961	539.06	538.515	488.029	514.961	495.598	487.593	515.375	491.682
YDR354C-A	YDR354C-A	0	0	0	0	0	0	0	0	0	0	0	0
YDR354W	TRP4	86.6113	83.6537	82.6132	88.7176	88.1656	84.093	76.6412	84.8807	87.971	61.5961	68.761	68.4199
YDR355C	YDR355C	0	0	0	0	0	0	0	0	0	0	0	0
YDR356W	SPC110	19.6306	22.4073	21.5369	17.5997	16.6686	18.0503	19.6611	22.0034	19.0114	16.9718	16.1359	16.8131
YDR357C	CNL1	99.5853	119.068	119.289	226.22	272.358	271.394	98.6056	127.781	130.779	180.574	226.631	252.315
YDR358W	GGA1	25.477	22.8378	31.2323	44.8546	62.7023	57.88	16.6748	21.0084	21.8335	58.0351	52.5496	71.5133
YDR359C	EAF1	18.7017	18.9373	19.2439	32.1121	31.6231	31.4805	22.6664	20.0031	17.8415	23.0828	23.117	19.6396
YDR360W	OPI7	0	0	0	0	0	0	0	0	0	0	0	0
YDR361C	BCP1	154.038	176.867	164.128	85.0431	58.7299	74.7163	144.98	148.353	147.356	34.9296	45.4489	25.7103
YDR362C	TFC6	27.1172	24.8311	26.534	28.8352	28.9436	30.6816	24.0095	23.5697	24.5018	31.996	30.3097	29.3719
YDR363W	ESC2	22.3629	22.9104	22.5994	26.7191	31.5862	26.5509	21.433	20.3957	22.9753	29.2076	30.7567	29.5884
YDR363W-A	SEM1	1026.35	948.697	1004.96	1343.07	1741.61	1315.36	731.259	747.997	826.415	1218.52	1583.57	1468.74
YDR364C	CDC40	35.873	36.3105	33.9402	42.7951	45.3746	48.6235	32.755	33.7867	35.9842	32.3051	33.9805	27.2176
YDR365C	ESF1	152.81	174.563	150.405	115.27	117.856	119.302	191.607	194.933	187.423	121.942	166.116	139.273
YDR365W-A	YDR365W-A	2.52327e-07	4.90307e-07	3.20174e-07	5.68169e-07	2.54851e-07	3.14301e-06	3.37928e-07	6.31322e-07	4.93241e-07	3.73276e-07	3.95969e-07	1.91107e-07
YDR365W-B	YDR365W-B	107.475	118.455	123.935	178	181.307	203.801	102.899	111.855	92.7317	132.912	116.163	133.467
YDR366C	YDR366C	13.8935	3.57726	5.71809	7.54698	11.7848	10.1234	5.19031	3.74899	7.70822	11.0866	17.8136	10.2027
YDR367W	KEI1	88.3164	91.5302	91.0206	84.7879	92.0576	93.1601	68.8974	83.2872	78.8859	68.4173	65.3705	59.3711
YDR368W	YPR1	120.968	115.388	110.286	185.887	192.294	199.895	90.1436	92.8956	86.1386	173.625	169.495	170.534
YDR369C	XRS2	9.42724	7.57663	8.36281	15.7295	18.0876	19.1202	7.63496	7.65036	6.68557	18.3403	16.201	17.1363
YDR370C	YDR370C	55.0158	57.6654	58.2784	49.6594	45.47	51.4192	44.9847	57.3144	54.9367	38.7886	42.9861	36.2392
YDR371C-A	YDR371C-A	0	0	0	0	0	0	0	0	0	0	4333.2	0
YDR371W	CTS2	36.9972	33.9969	33.9464	46.6057	47.0115	49.7302	32.4884	30.1872	31.4552	40.5456	38.3547	43.7522
YDR372C	VPS74	157.557	172.829	166.124	154.331	149.167	159.705	143.588	151.394	149.139	123.3	119.2	119.033
YDR373W	FRQ1	174.72	172.071	186.038	276.877	292.433	307.107	163.467	168.144	188.977	257.798	271.973	291.893
YDR374C	YDR374C	0.151552	0.165963	0.358879	0.391392	0.151027	0.840899	0.160114	0.171225	0.372485	0.185752	1.0851	0.767997
YDR374W-A	YDR374W-A	137.645	124.06	134.522	188.581	200.828	245.22	111.67	112.602	121.868	136.437	121.813	214.3
YDR375C	BCS1	53.5876	49.4126	52.4515	62.9154	68.3184	61.0278	41.1813	45.9904	43.8719	40.9121	44.4148	43.159
YDR376W	ARH1	37.339	35.3128	39.9597	52.8082	57.66	57.1018	33.5331	33.0049	35.5497	56.7992	56.8281	51.4975
YDR377W	ATP17	167.085	152.147	157.695	215.883	263.823	233.089	159.267	235.947	181.71	289.462	401.086	357.985
YDR378C	LSM6	896.215	744.007	897.664	609.215	669.983	598.093	675.178	888.53	863.848	408.319	511.997	471.095
YDR379C-A	YDR379C-A	143.962	100.024	130.103	392.899	399.996	429.467	70.6083	46.5484	67.6544	336.798	332.854	354.818
YDR379W	RGA2	23.0793	23.788	25.5809	30.2619	34.2816	34.2669	24.3629	23.4757	22.6106	35.339	33.4603	34.6246
YDR380W	ARO10	12.9255	24.4755	13.5059	395.531	499.65	371.988	17.6453	26.5891	24.0466	349.929	319.386	300.66
YDR381C-A	YDR381C-A	77.7611	72.9572	76.4963	143.989	138.322	179.706	51.6241	77.7691	79.3161	117.778	155.67	131.605
YDR381W	YRA1	595.987	567.935	602.954	329.756	325.96	307.846	506.603	546.865	535.198	215.935	235.794	213.693
YDR382W	RPP2B	5775.03	6001.78	5867.42	2219.01	1958.05	1860.22	5812.27	5820.8	6135.79	331.628	551.7	313.158
YDR383C	NKP1	34.3817	33.2747	35.6531	41.3739	49.6281	40.517	34.4892	32.1228	40.1655	23.8736	36.3338	25.4722
YDR384C	ATO3	156.053	156.365	156.089	132.631	92.3958	117.767	127.906	129.313	126.797	31.0621	41.578	32.3032
YDR385W	EFT2	1247.29	1348.43	1278.51	965.567	767.785	837.225	1472.26	1370.34	1225.54	297.842	365.901	271.983
YDR386W	MUS81	21.9629	18.5407	20.584	23.3166	27.9802	27.2334	17.9955	19.0793	18.0615	23.0556	23.1762	24.3537
YDR387C	YDR387C	23.2948	22.7846	27.5706	28.8392	32.6739	32.4924	20.1995	19.8841	19.9501	35.8646	29.5789	33.4323
YDR388W	RVS167	149.009	142.364	155.248	245.685	274.22	270.615	130.742	121.696	128.244	250.208	242.485	217.511
YDR389W	SAC7	41.9193	44.6071	43.6964	47.8526	43.7155	49.8922	38.3828	44.1413	38.7453	44.5544	40.259	40.9819
YDR390C	UBA2	54.1158	60.379	52.8706	53.5204	49.6733	52.1981	48.9657	47.2118	52.9808	37.5331	33.4584	31.1946
YDR391C	YDR391C	70.5401	60.263	72.4745	122.041	138.665	137.544	41.6702	56.2435	55.856	148.905	140.687	148.082
YDR392W	SPT3	49.6606	45.1581	54.0134	58.3234	69.373	62.9517	44.8142	44.9228	48.4659	50.6278	56.6816	52.4216
YDR393W	SHE9	28.2807	25.3373	24.0709	31.1722	34.6915	33.6671	23.3984	28.2941	26.2028	24.2144	29.1928	25.2503
YDR394W	RPT3	251.198	219.301	236.976	360.061	397.567	352.804	226.058	230.311	234.817	393.674	412.649	380.79
YDR395W	SXM1	61.2382	72.3229	64.6107	79.6106	61.5601	71.7845	70.8435	65.1181	59.9768	35.241	41.7429	28.8358
YDR396W	YDR396W	0	0	1.05234	0	0	0	0	0	0	0	0	0
YDR397C	NCB2	181.85	182.938	189.354	153.214	160.683	159.488	135.96	138.992	164.028	93.7234	122.51	80.7587
YDR398W	UTP5	91.4075	108.629	95.9827	107.25	65.8969	90.5095	97.9755	97.4733	91.1764	28.0534	52.7455	16.418
YDR399W	HPT1	572.3	665.577	592.233	304.645	180.771	231.056	603.366	595.862	585.612	159.324	233.4	83.511
YDR400W	URH1	56.2572	58.9028	53.819	54.4063	52.8977	51.538	42.1971	44.2242	45.7899	36.4991	43.8749	43.8544
YDR401W	YDR401W	1.35989	3.41616	2.45118	1.35311	0.68177	2.32349	0.733785	0.787467	2.10189	0.881567	0.433058	1.3576
YDR402C	DIT2	1.06353	1.06746	0.963346	1.98738	2.2776	2.06812	1.97238	2.56465	2.60786	2.94781	2.86122	5.39607
YDR403W	DIT1	2.19489	1.74863	2.58282	4.67145	4.21804	4.89946	3.83086	4.1729	5.20114	6.2236	8.3987	8.08585
YDR404C	RPB7	145.598	133.411	132.826	111.428	132.796	133.581	129.889	130.065	134.281	133.193	129.203	119.891
YDR405W	MRP20	100.395	72.9199	90.9243	89.5613	113.958	98.7317	66.9611	85.7861	85.5808	65.3017	86.8267	83.4085
YDR406W	PDR15	32.2013	25.339	38.6825	30.0892	31.2544	45.1494	16.4359	18.681	15.1923	19.8428	19.613	23.9724
YDR406W-A	YDR406W-A	0	0	0	0	4.9286	5.46714	0	0	0	0	0	7.78217
YDR407C	TRS120	25.5612	27.7577	29.1003	32.2587	30.8366	32.9827	25.8381	28.0848	24.2343	32.5384	30.39	29.2423
YDR408C	ADE8	144.807	144.278	139.731	124.273	127.022	121.397	78.6237	87.9018	102.075	92.4726	119.474	104.186
YDR409W	SIZ1	18.0948	17.9448	18.5595	25.5436	25.2414	27.2998	16.707	16.3605	16.4194	27.1764	26.5559	24.6493
YDR410C	STE14	94.4052	99.1327	89.9611	108.602	112.882	113.791	67.5611	75.3518	80.0543	77.9018	81.2	74.4484
YDR411C	DFM1	71.0823	71.1939	73.1626	67.9402	78.5083	73.6996	48.6865	46.5399	56.3271	45.8707	44.9266	48.1058
YDR412W	RRP17	140.342	154.185	161.017	106.7	89.1286	87.8583	137.655	159.417	141.445	46.5416	56.8372	37.1522
YDR413C	YDR413C	1.30544	1.45548	2.35058	1.29641	0	1.85529	0.703353	1.8865	3.63039	0	0.413755	0.432863
YDR414C	ERD1	48.3792	51.0388	43.7247	32.4484	27.9762	33.866	42.5169	45.1717	48.6931	22.0425	24.5533	21.6007
YDR415C	YDR415C	35.564	34.0294	34.8537	48.7902	45.2511	52.4842	27.489	31.0601	32.9151	34.7536	37.3091	37.5576
YDR416W	SYF1	19.4097	20.7912	20.9445	23.278	20.2422	23.0719	19.7107	21.9038	19.407	21.1134	21.4587	20.8355
YDR417C	YDR417C	0.951928	0	0	1.35059	0	0	1.07877	2.34637	1.19132	0	0	2.88341
YDR418W	RPL12B	3177.87	3452	3159.32	1845.93	1835.51	1755.67	3160.23	3369.83	3415.98	318.088	547.659	317.209
YDR419W	RAD30	22.9257	24.8732	21.362	29.1458	30.3717	33.1351	22.4	22.7742	21.8212	25.1385	26.2582	22.3428
YDR420W	HKR1	17.8007	17.8731	18.5578	24.5083	18.7482	22.9988	21.4039	19.9645	18.1644	19.4824	20.4801	15.7565
YDR421W	ARO80	13.7534	13.9858	16.0284	24.2161	26.1822	27.8581	12.8046	14.2566	13.1267	30.2886	26.4272	29.0055
YDR422C	SIP1	21.8711	26.6389	25.3368	31.9357	32.5023	35.0534	24.0282	24.0949	22.0751	39.3238	33.7079	35.8078
YDR423C	CAD1	42.2966	32.8076	48.3161	52.7481	56.4503	57.5697	26.4698	31.1564	36.5638	45.536	52.773	53.1704
YDR424C	DYN2	300.221	259.489	309.404	277.2	298.173	270.69	230.046	238.478	311.064	298.069	264.581	304.683
YDR425W	SNX41	18.6543	19.7776	21.6436	25.9565	30.9526	32.3373	18.7432	20.0802	17.9254	32.7523	30.421	36.3755
YDR426C	YDR426C	0	0	0	0	3.70735	1.0905	1.02411	0	0	0	2.68286	0
YDR427W	RPN9	211.34	212.427	193.422	311.388	351.256	333.676	189.34	211.046	210.416	400.827	375.505	356.539
YDR428C	BNA7	45.4443	55.0311	44.1841	62.755	70.4106	69.542	31.747	35.9342	34.2137	38.052	42.6829	36.5747
YDR429C	TIF35	476.956	493.808	461.515	366.248	346.038	350.223	471.355	424.237	477.574	197.567	243.125	159.26
YDR430C	CYM1	37.2386	37.539	38.1018	63.1568	63.436	67.2181	37.0216	38.0658	32.7868	46.7685	46.5768	44.4433
YDR431W	YDR431W	0	0	0	0	0	0	0	0	0	0	0	0
YDR432W	NPL3	321.903	289.707	295.092	331.991	361.676	348.952	337.765	313.236	298.933	307.954	329.606	255.801
YDR433W	YDR433W	82.5971	57.2037	58.4286	80.5727	94.3189	75.0161	76.9584	72.3093	74.9195	43.9495	60.9782	44.296
YDR434W	GPI17	74.4124	71.2215	70.9178	86.1094	79.9943	91.4167	62.8044	63.9475	61.0749	74.3232	73.55	66.4448
YDR435C	PPM1	42.614	41.7886	45.8472	69.7965	67.7782	69.4257	40.7449	39.9959	38.329	87.9226	75.535	85.7193
YDR436W	PPZ2	19.8775	17.3309	18.3488	26.7162	32.4387	31.9977	20.3285	17.3613	16.7465	37.3293	30.9054	38.2627
YDR437W	GPI19	11.1571	6.78717	12.0798	3.62434	11.9747	11.6246	7.29415	7.09473	8.17681	8.30097	11.0557	14.1321
YDR438W	THI74	19.1464	17.4529	22.056	21.751	20.8017	21.1451	18.0601	19.4328	19.4891	21.9548	23.8209	19.4962
YDR439W	LRS4	25.4497	29.4686	26.7669	31.2754	34.3379	38.984	26.1435	26.0826	27.8123	32.9334	33.5858	29.7981
YDR440W	DOT1	32.5553	37.3583	37.9766	27.8718	27.2794	30.1064	32.1003	32.0788	33.3664	17.3629	21.0714	17.7535
YDR441C	APT2	47.143	66.1473	67.223	34.2681	33.8415	38.1175	55.12	69.5001	67.7552	39.2844	43.2973	32.0477
YDR442W	YDR442W	0	0	0.997553	0	0	0.964138	0	0	1.00733	0	0	0
YDR443C	SSN2	8.30062	9.44978	9.04167	16.3348	16.2004	16.7425	9.20635	8.83025	7.61058	17.2434	14.5674	14.0869
YDR444W	YDR444W	30.0664	29.8483	30.5478	22.3993	21.8519	23.3843	27.1112	25.9578	28.0985	13.4735	14.6402	14.8511
YDR445C	YDR445C	0	0	0	0	0	0	0	0	0	0	0	0
YDR446W	ECM11	0.46329	0.845819	0.91444	0.797974	2.61646	2.22874	0.489623	0.349084	0.379594	0.189439	0.368927	0.978951
YDR447C	RPS17B	2983.11	3338.48	2931.88	1526.3	1476.85	1493.72	2802.4	2805.79	3105.6	206.198	296.868	155.226
YDR448W	ADA2	25.2544	31.1146	27.4185	34.5382	30.6927	32.3025	29.9997	27.0452	27.1335	27.4713	30.9039	28.6887
YDR449C	UTP6	67.0881	78.4666	63.124	80.3949	63.1101	81.5572	66.8888	77.3162	65.5755	22.3758	33.413	13.7423
YDR450W	RPS18A	5501.11	6016.03	5529.86	2796.02	2649.47	2670.32	5447.2	5489.38	5521.55	535.446	757.369	509.529
YDR451C	YHP1	46.9971	44.636	46.0512	56.4533	51.7446	52.6448	42.1665	41.2683	41.3684	35.5272	37.782	33.4727
YDR452W	PPN1	131.101	126.654	131.13	120.608	125.606	132.514	108.137	108.283	107.383	140.052	132.109	129.849
YDR453C	TSA2	29.2145	17.2981	38.0083	335.388	365.032	432.24	12.7044	23.6659	15.742	403.871	479.737	554.525
YDR454C	GUK1	631.781	676.211	649.97	346.847	334.067	350.944	545.569	579.97	576.337	151.629	210.466	193.684
YDR455C	YDR455C	0	0	0	0	0	0	0	0	0	0	0	0
YDR456W	NHX1	66.5029	67.8345	62.1904	57.3409	56.9311	62.0661	49.5528	48.4811	44.3711	40.0745	36.3586	39.1753
YDR457W	TOM1	17.4179	19.0595	18.54	21.7995	18.7438	21.5359	19.835	19.9381	17.495	19.533	18.0664	17.7592
YDR458C	HEH2	43.0235	42.6818	45.0564	44.5192	48.6798	54.1084	44.8537	41.4089	38.3433	42.5521	44.1538	43.3538
YDR459C	PFA5	36.2546	31.2669	38.0243	37.7015	38.263	37.4887	34.1493	35.5897	34.7516	33.9162	33.5782	35.5353
YDR460W	TFB3	45.2585	48.8145	47.9305	54.6144	60.3986	63.5771	39.7643	47.3112	46.1156	57.5759	59.6397	56.3857
YDR461C-A	YDR461C-A	141.392	128.582	178.867	300.947	416.263	350.644	55.8347	119.727	146.046	292.066	375.885	549.638
YDR461W	MFA1	2464.49	993.521	6922.38	5427.58	2266.2	3051.93	0	2436.25	0	0	0	0
YDR462W	MRPL28	80.6949	76.6202	94.6813	95.7945	145.018	123.384	64.5259	77.8853	84.9141	73.5279	91.4493	90.6319
YDR463W	STP1	43.2086	43.0694	47.0963	60.4477	66.8505	72.8512	46.8171	46.1275	43.5471	68.5038	65.6788	64.7552
YDR464C-A	YDR464C-A	0	0	0	0	0	0	0	0	0	0	0	0
YDR464W	SPP41	21.5691	25.2839	23.9455	27.0221	23.0199	25.4001	26.2004	24.7277	21.9841	23.9724	24.9568	16.6609
YDR465C	RMT2	99.6085	124.331	104.964	74.9784	49.637	64.8224	103.279	107.236	100.82	21.6909	43.0958	16.2422
YDR466W	PKH3	24.6822	26.0615	28.0233	37.8331	34.3196	40.7565	25.8789	25.3755	24.1953	41.0234	38.6585	40.9769
YDR467C	YDR467C	1.46117	5.23684	0	4.28197	3.05324	0	5.08472	3.72001	1.83894	0	0	0
YDR468C	TLG1	98.8259	91.3739	95.3577	129.981	135.307	137.575	71.4858	77.416	90.7669	88.6994	95.1959	91.0515
YDR469W	SDC1	123.347	120.737	126.035	119.353	104.565	120.695	94.823	104.581	111.125	80.7146	95.479	74.3632
YDR470C	UGO1	31.5298	31.8631	33.9489	40.6016	43.87	46.1317	28.6408	31.6535	30.1069	30.8055	31.5584	34.1307
YDR471W	RPL27B	2135.84	2170.43	2149.66	1538.49	1454.92	1375.34	1980.27	2170.23	2266.57	221.827	409.708	191.629
YDR472W	TRS31	56.3532	57.9159	58.9023	72.0779	68.7157	59.3891	44.5651	46.7117	52.5972	40.5246	49.3212	38.2413
YDR473C	PRP3	27.5657	26.8939	33.0794	36.0373	37.4203	38.9366	27.1926	30.2043	24.1891	32.1138	30.8747	29.6746
YDR475C	JIP4	18.699	18.2287	20.538	32.2322	44.176	37.5587	18.3875	20.6879	19.5697	38.4829	34.6175	45.2534
YDR476C	YDR476C	122.981	89.4082	134.554	98.529	84.5667	89.8787	76.461	81.0624	86.1568	100.444	134.307	127.026
YDR477W	SNF1	61.5629	63.6641	65.4499	67.1401	75.013	77.1219	68.5826	60.7523	58.1313	82.2279	67.5728	73.6674
YDR478W	SNM1	22.8729	20.3568	25.2186	31.4017	27.795	28.3498	22.294	23.5566	29.0051	12.9134	26.0962	23.7313
YDR479C	PEX29	30.5878	25.1253	30.3605	29.6202	40.312	35.9585	25.102	27.1988	25.8534	38.0271	37.3616	42.1441
YDR480W	DIG2	29.8416	29.8003	29.4044	23.5363	27.4193	27.6966	22.8195	27.0915	28.4644	21.1021	28.0477	26.965
YDR481C	PHO8	57.7442	51.7995	55.3883	97.001	101.119	96.0993	56.0988	52.1293	46.4068	112.514	100.615	107.624
[truncated: 5,131 more rows]
