# Supplementary figures and images for: Cytoplasmic protein misfolding titrates Hsp70 to activate nuclear Hsf1
Source: eLife journal article supplement (doi:10.7554/elife.47791), 2019-09-25

Fig. 3-figure supplement 1

A

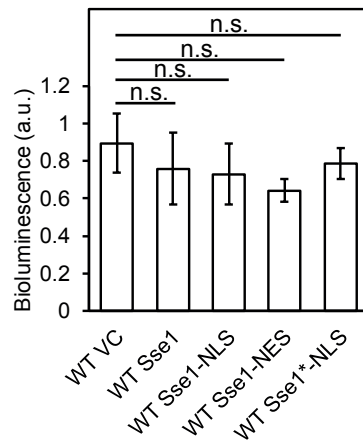

B

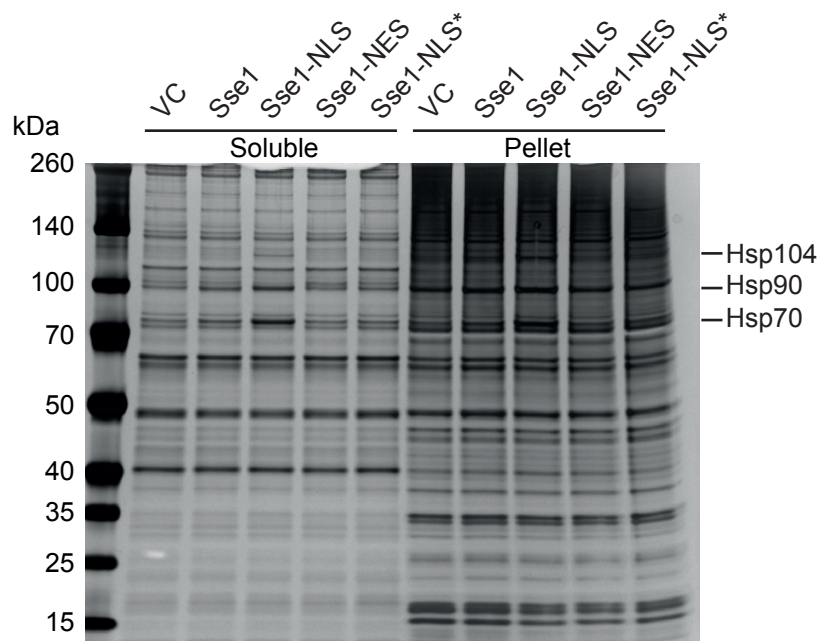

Supplement: supp [file elife-47791-supp-v1.zip]

Fig. 1-figure supplement 1

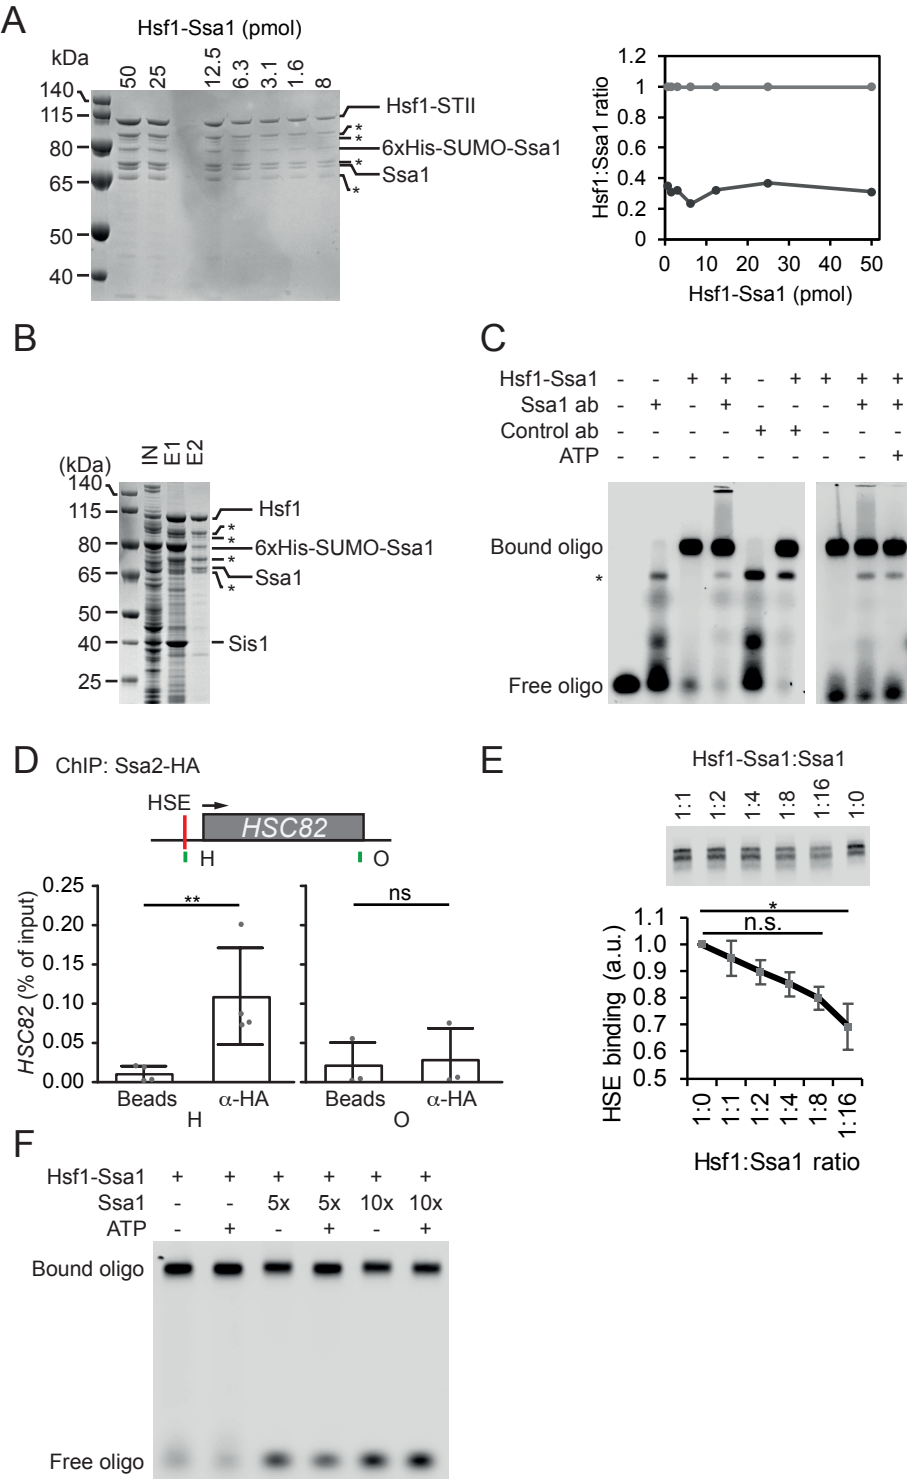

Supplement: supp [file elife-47791-supp-v1.zip]

Fig. 6-figure supplement 1

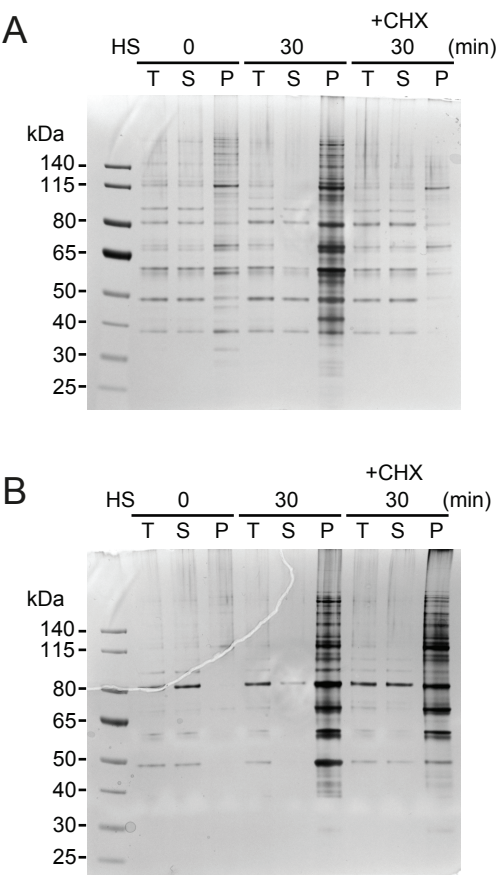

Supplement: supp [file elife-47791-supp-v1.zip]

Fig. 1-figure supplement 2

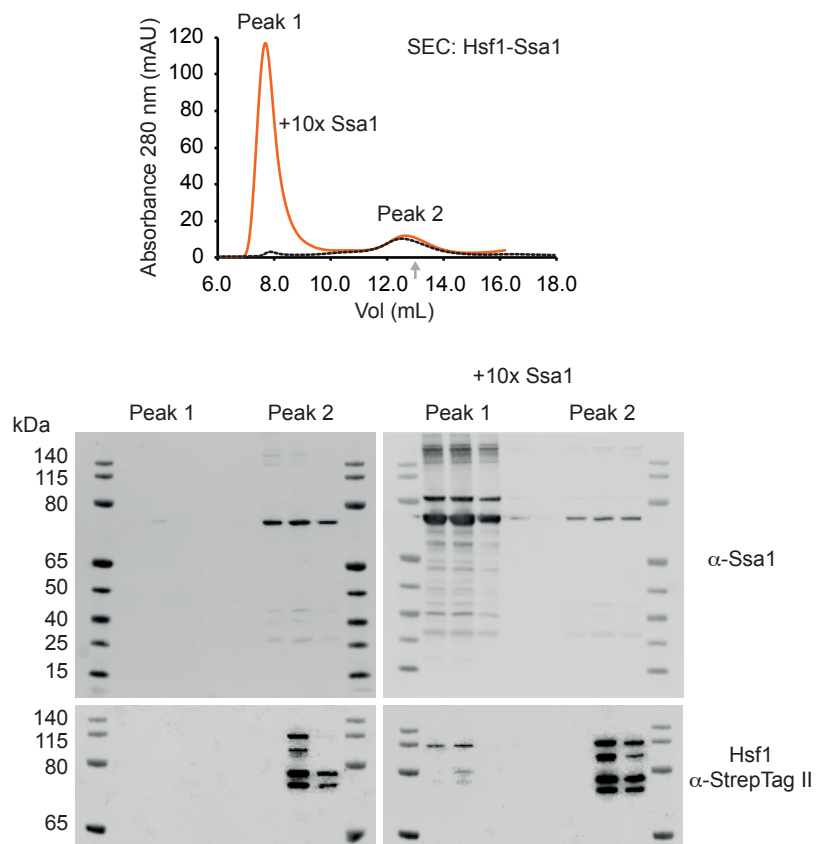

Supplement: supp [file elife-47791-supp-v1.zip]

Fig. 4-figure supplement 2

A

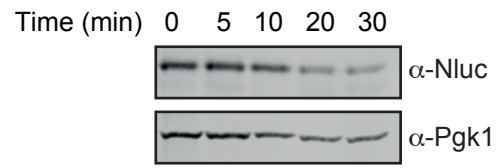

B

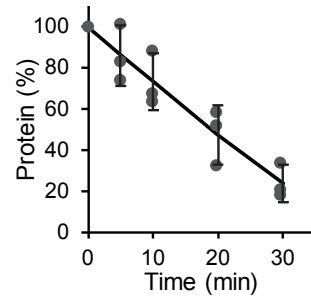

Supplement: supp [file elife-47791-supp-v1.zip]

Fig. 5-figure supplement 2

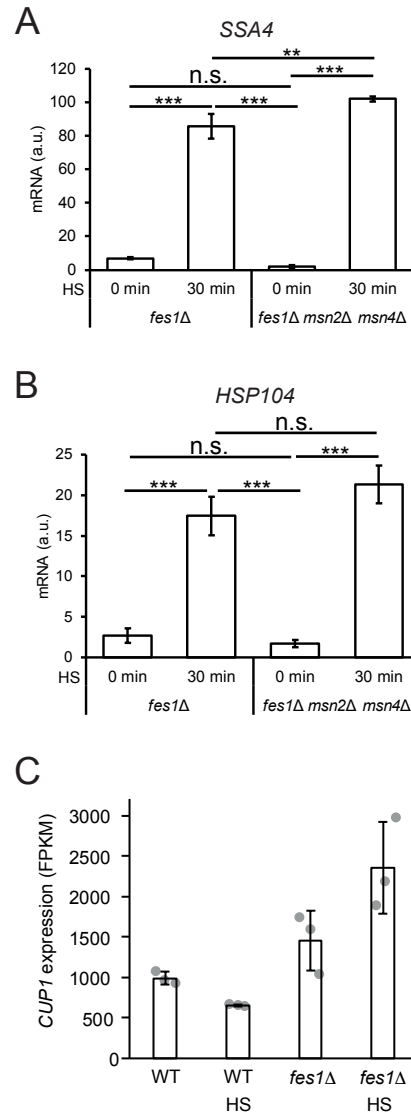

Supplement: supp [file elife-47791-supp-v1.zip]

Fig. 4-figure supplement 1

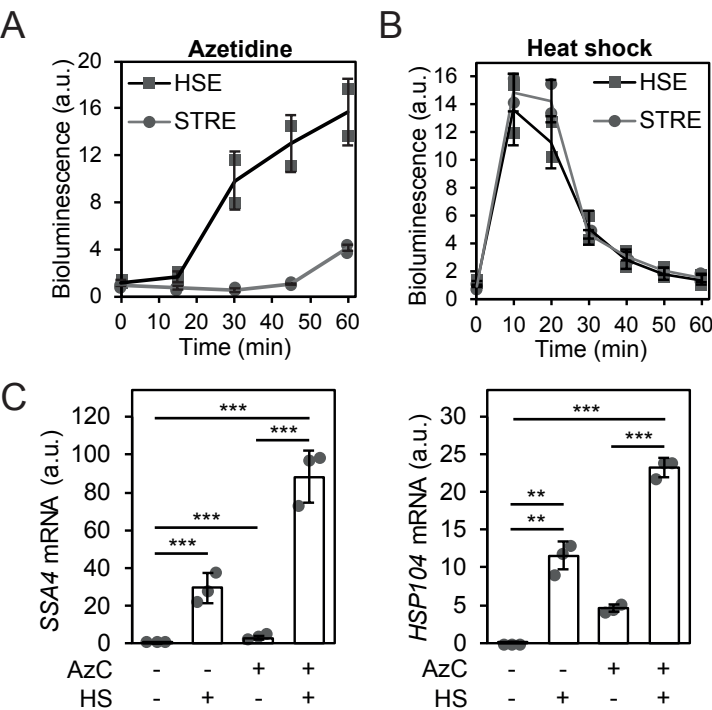

Supplement: supp [file elife-47791-supp-v1.zip]

Fig. 5-figure supplement 1

A

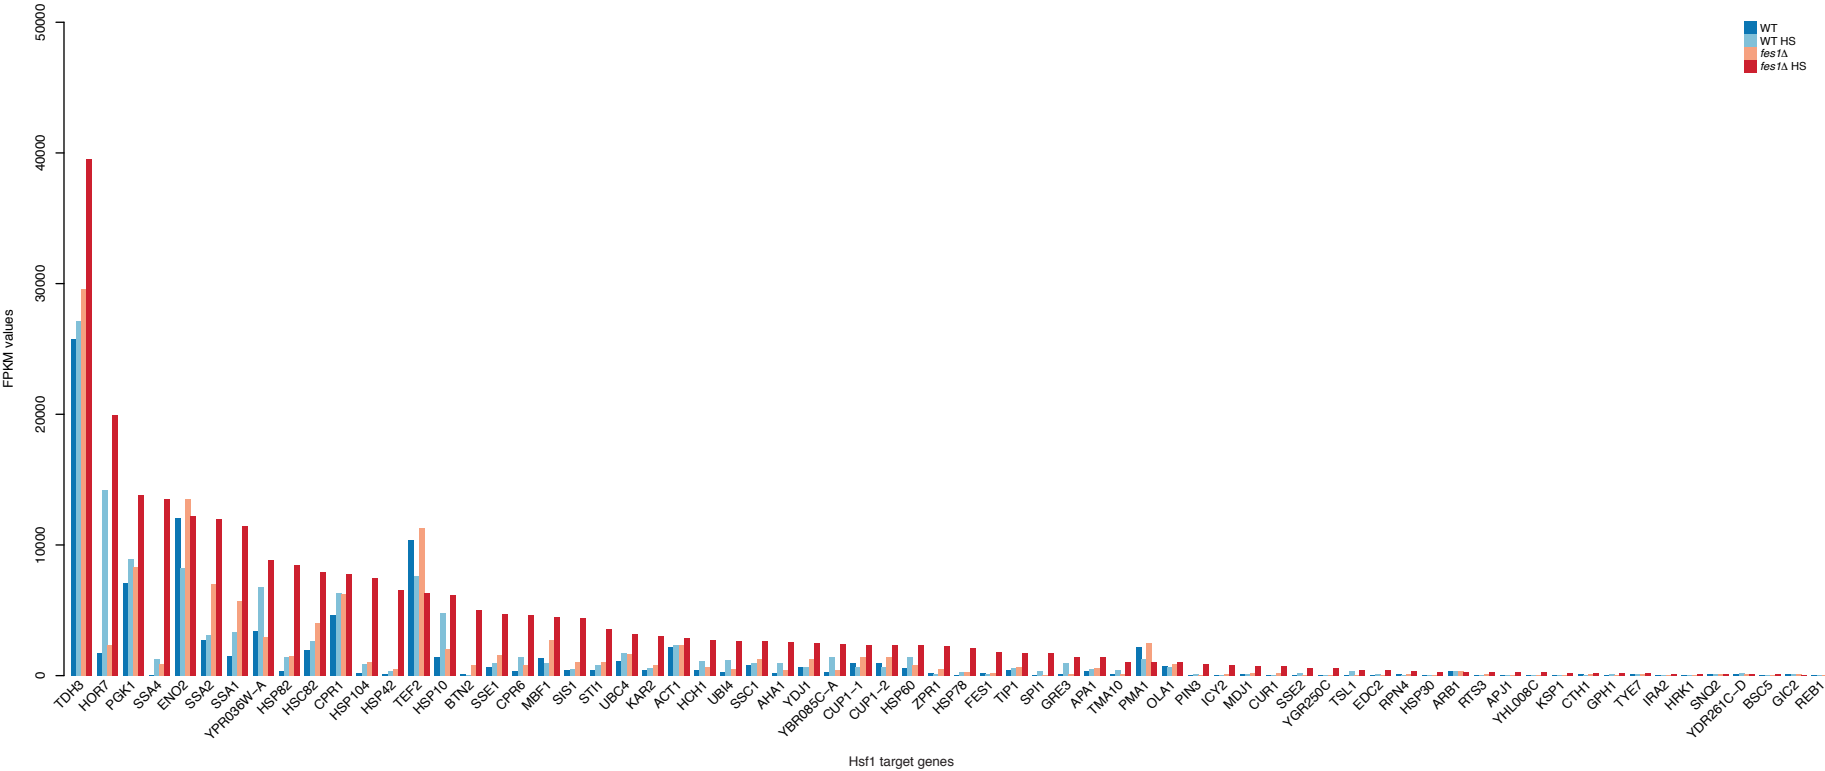

B

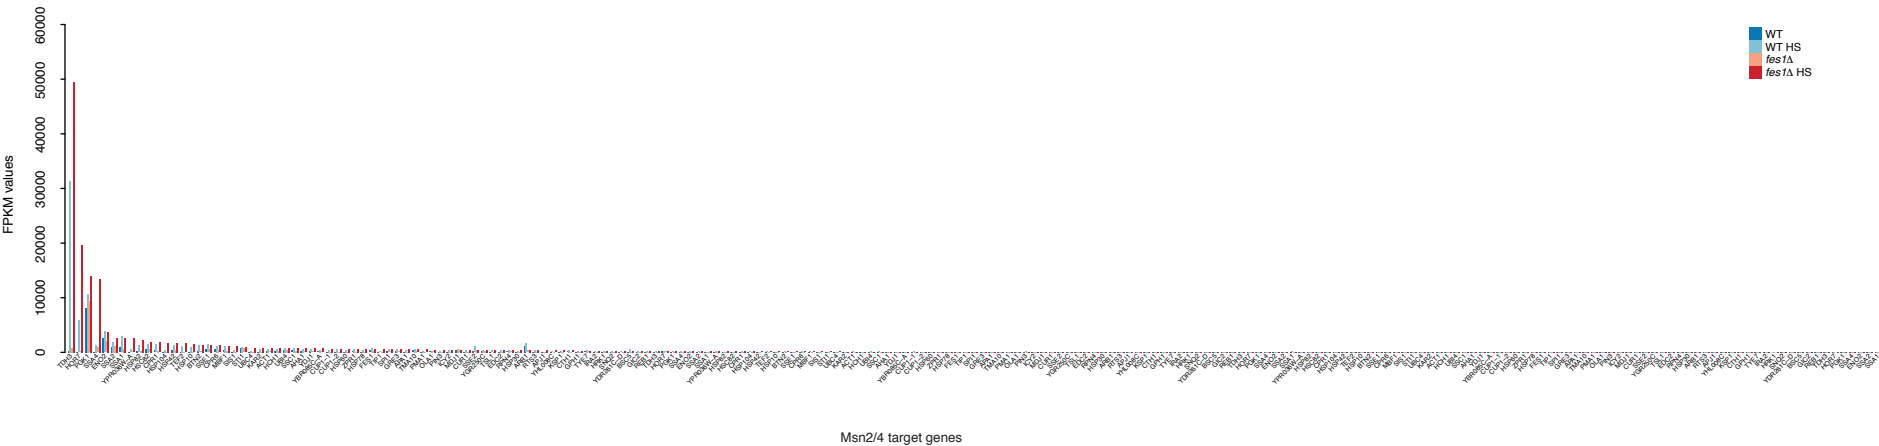

Supplement: supp [file elife-47791-supp-v1.zip]

Fig. 5-figure supplement 3

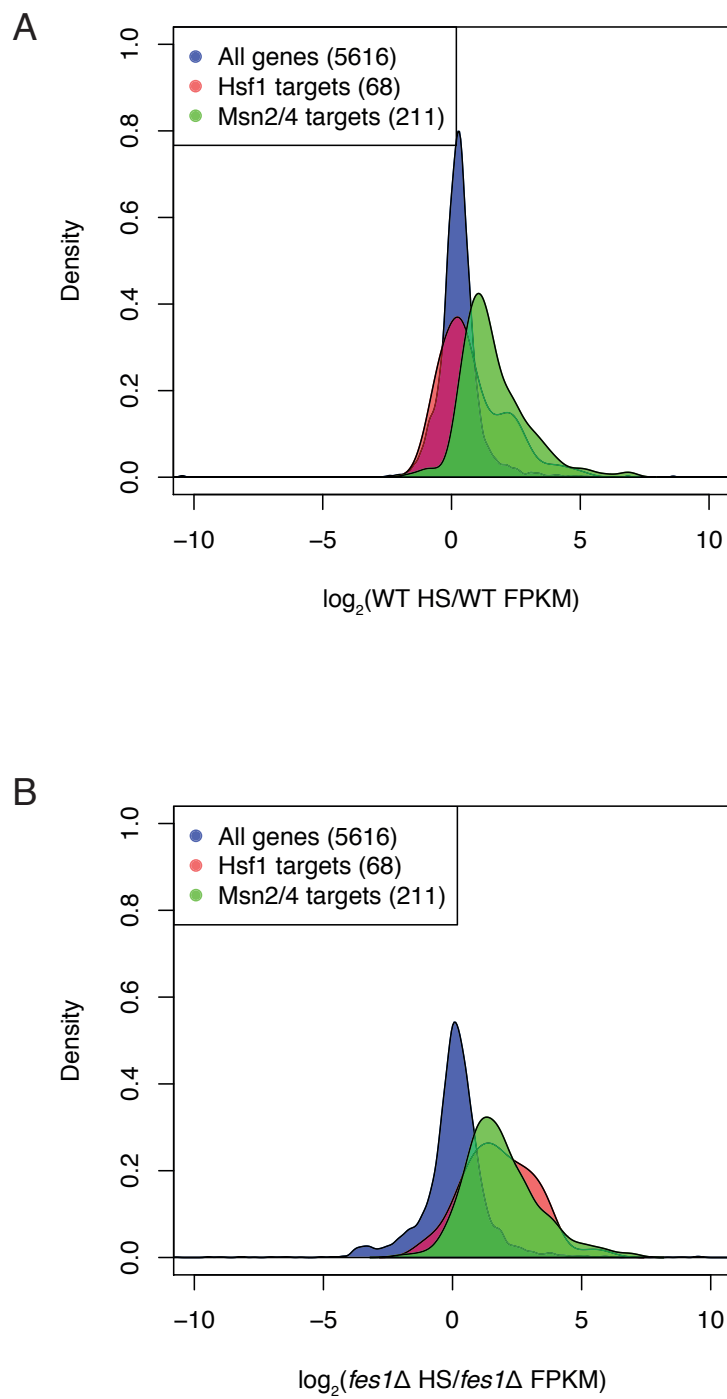

Supplement: supp [file elife-47791-supp-v1.zip]

Fig. 5-figure supplement 4

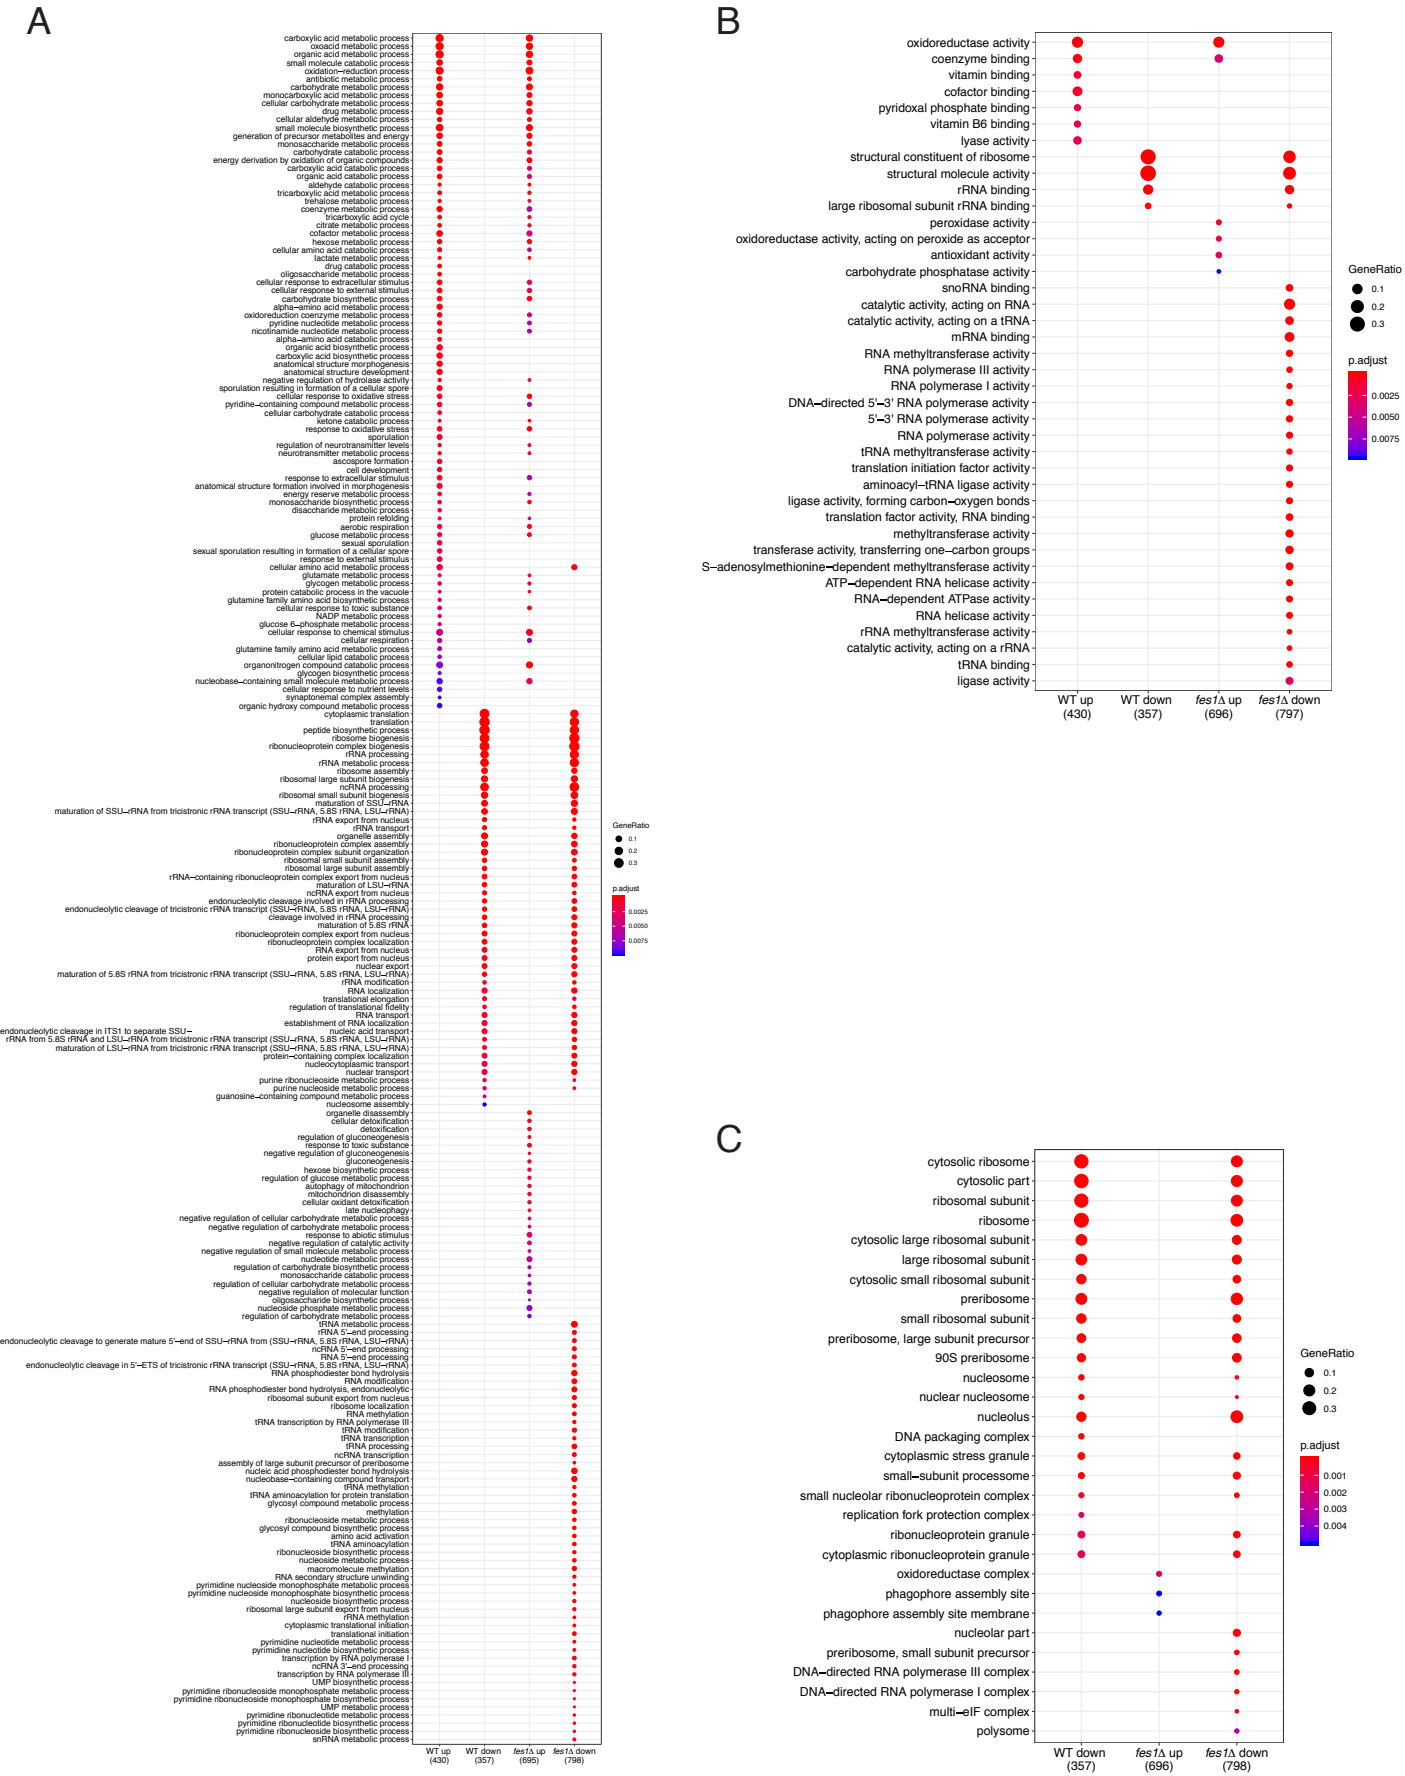

Supplement: supp [file elife-47791-supp-v1.zip]
